# Supplementary material for: Comparison of the composition and function of gut microbes between adult and juvenile Cipangopaludina chinensis in the rice snail system
Source: PeerJ. 2022 Mar 8;10:e13042. doi: 10.7717/peerj.13042 (PMC8916024; doi:10.7717/peerj.13042)
Supplement: Supplemental Information 2 [file peerj-10-13042-s002.xls]

## Sheet: VENN analysis
OTU	Adult	Juvenile	Sediment	Taxonomy
Otu000001	7207	7438	164	k__Bacteria;p__Proteobacteria;c__Gammaproteobacteria;o__Aeromonadales;f__Aeromonadaceae;g__Aeromonas
Otu000002	3373	4681	3984	k__Bacteria;p__Verrucomicrobia;c__Verrucomicrobiae;o__Verrucomicrobiales;f__Rubritaleaceae;g__Luteolibacter;s__
Otu000003	5631	4174	113	k__Bacteria;p__Proteobacteria;c__Gammaproteobacteria;o__Aeromonadales;f__Aeromonadaceae;g__Aeromonas
Otu000004	5251	4401	105	k__Bacteria;p__Proteobacteria;c__Gammaproteobacteria;o__Aeromonadales;f__Aeromonadaceae
Otu000005	4394	3918	120	k__Bacteria;p__Proteobacteria;c__Gammaproteobacteria;o__Aeromonadales;f__Aeromonadaceae
Otu000006	1812	1221	977	k__Bacteria;p__Verrucomicrobia;c__Verrucomicrobiae;o__Verrucomicrobiales;f__Rubritaleaceae;g__Luteolibacter;s__
Otu000007	1043	3158	30	k__Bacteria;p__Proteobacteria;c__Gammaproteobacteria;o__Aeromonadales;f__Aeromonadaceae;g__Aeromonas
Otu000008	1863	1693	22	k__Bacteria;p__Proteobacteria;c__Gammaproteobacteria;o__Aeromonadales;f__Aeromonadaceae;g__Aeromonas
Otu000009	2542	986	23	k__Bacteria;p__Fusobacteria;c__Fusobacteriia;o__Fusobacteriales;f__Fusobacteriaceae;g__Cetobacterium;s__
Otu000010	693	1153	943	k__Bacteria;p__Verrucomicrobia;c__Verrucomicrobiae;o__Verrucomicrobiales;f__Rubritaleaceae;g__Luteolibacter
Otu000011	1818	1382	18	k__Bacteria;p__Proteobacteria;c__Gammaproteobacteria;o__Aeromonadales;f__Aeromonadaceae;g__Aeromonas
Otu000012	715	1554	48	k__Bacteria;p__Proteobacteria;c__Gammaproteobacteria
Otu000013	140	205	1190	k__Bacteria;p__Proteobacteria;c__Gammaproteobacteria;o__Betaproteobacteriales;f__Rhodocyclaceae;g__Dechloromonas;s__
Otu000014	423	406	791	k__Bacteria;p__Proteobacteria;c__Gammaproteobacteria;o__Steroidobacterales;f__Steroidobacteraceae;g__;s__
Otu000015	1432	555	22	k__Bacteria;p__Cyanobacteria;c__Oxyphotobacteria;o__Chloroplast
Otu000016	138	1793	22	k__Bacteria;p__Cyanobacteria;c__Oxyphotobacteria;o__Nostocales;f__Phormidiaceae;g__Planktothrix_NIVA-CYA_15;s__
Otu000017	339	1466	15	k__Bacteria;p__Proteobacteria;c__Gammaproteobacteria;o__Aeromonadales;f__Aeromonadaceae;g__Aeromonas
Otu000018	706	764	144	k__Bacteria;p__Bacteroidetes;c__Bacteroidia;o__Flavobacteriales;f__Flavobacteriaceae;g__Flavobacterium
Otu000019	1559	23	8	k__Bacteria
Otu000020	229	1304	29	k__Bacteria;p__Firmicutes;c__Clostridia;o__Clostridiales;f__Peptostreptococcaceae;g__Proteocatella;s__
Otu000021	1057	479	5	k__Bacteria;p__Fusobacteria;c__Fusobacteriia;o__Fusobacteriales;f__Fusobacteriaceae;g__Cetobacterium
Otu000022	155	151	725	k__Bacteria;p__Chloroflexi;c__Anaerolineae;o__Anaerolineales;f__Anaerolineaceae;g__;s__
Otu000023	765	562	10	k__Bacteria;p__Proteobacteria;c__Gammaproteobacteria
Otu000024	538	341	253	k__Bacteria;p__Verrucomicrobia;c__Verrucomicrobiae;o__Verrucomicrobiales;f__Rubritaleaceae;g__Luteolibacter;s__
Otu000025	588	580	20	k__Bacteria;p__Proteobacteria;c__Gammaproteobacteria;o__Aeromonadales;f__Aeromonadaceae
Otu000026	146	138	521	k__Bacteria;p__Chloroflexi;c__Anaerolineae;o__Anaerolineales;f__Anaerolineaceae;g__;s__
Otu000027	81	98	543	k__Bacteria;p__Acidobacteria;c__Subgroup_17
Otu000028	451	495	5	k__Bacteria;p__Proteobacteria;c__Gammaproteobacteria;o__Aeromonadales;f__Aeromonadaceae;g__Aeromonas
Otu000029	410	508	16	k__Bacteria;p__Fusobacteria;c__Fusobacteriia;o__Fusobacteriales;f__Fusobacteriaceae;g__Cetobacterium;s__
Otu000030	163	166	349	k__Bacteria;p__Proteobacteria;c__Gammaproteobacteria;o__Betaproteobacteriales;f__Burkholderiaceae;g__;s__
Otu000031	64	73	449	k__Bacteria;p__Proteobacteria;c__Gammaproteobacteria;o__Betaproteobacteriales;f__B1-7BS;g__;s__
Otu000032	36	198	391	k__Bacteria;p__Bacteroidetes;c__Bacteroidia;o__Flavobacteriales;f__Flavobacteriaceae;g__Flavobacterium
Otu000033	156	155	319	k__Bacteria;p__Verrucomicrobia;c__Verrucomicrobiae;o__Verrucomicrobiales;f__Rubritaleaceae;g__Luteolibacter;s__
Otu000034	562	259	7	k__Bacteria;p__Bacteroidetes;c__Bacteroidia;o__Bacteroidales;f__Bacteroidaceae;g__Bacteroides;s__Bacteroides_luti
Otu000035	219	141	263	k__Bacteria;p__Proteobacteria;c__Gammaproteobacteria;o__Betaproteobacteriales;f__SC-I-84;g__;s__
Otu000036	255	472	26	k__Bacteria;p__Proteobacteria;c__Gammaproteobacteria;o__Pseudomonadales;f__Pseudomonadaceae;g__Pseudomonas
Otu000037	43	48	402	k__Bacteria;p__Rokubacteria;c__NC10;o__Rokubacteriales;f__;g__;s__
Otu000038	151	306	166	k__Bacteria;p__Proteobacteria;c__Gammaproteobacteria;o__Pseudomonadales;f__Pseudomonadaceae;g__Pseudomonas;s__Pseudomonas_peli
Otu000039	118	121	273	k__Bacteria;p__Chloroflexi;c__Anaerolineae;o__Caldilineales;f__Caldilineaceae;g__;s__
Otu000040	122	558	8	k__Bacteria;p__Proteobacteria;c__Gammaproteobacteria;o__Aeromonadales;f__Aeromonadaceae;g__Aeromonas
Otu000041	401	251	3	k__Bacteria;p__Proteobacteria;c__Gammaproteobacteria;o__Aeromonadales;f__Aeromonadaceae;g__Aeromonas
Otu000042	129	147	223	k__Bacteria;p__Verrucomicrobia;c__Verrucomicrobiae;o__Verrucomicrobiales;f__Rubritaleaceae;g__Luteolibacter;s__
Otu000043	47	77	311	k__Bacteria;p__Acidobacteria;c__Subgroup_6;o__;f__;g__;s__
Otu000044	220	202	131	k__Bacteria;p__Verrucomicrobia;c__Verrucomicrobiae;o__Verrucomicrobiales;f__Rubritaleaceae;g__Luteolibacter;s__
Otu000045	375	239	7	k__Bacteria;p__Proteobacteria;c__Gammaproteobacteria;o__Aeromonadales;f__Aeromonadaceae
Otu000046	299	305	6	k__Bacteria;p__Proteobacteria;c__Gammaproteobacteria;o__Aeromonadales
Otu000047	516	57	8	k__Bacteria;p__Cyanobacteria;c__Oxyphotobacteria;o__Chloroplast
Otu000048	20	258	183	k__Bacteria;p__Planctomycetes;c__Phycisphaerae;o__Tepidisphaerales;f__WD2101_soil_group;g__;s__
Otu000049	79	80	231	k__Bacteria;p__Proteobacteria;c__Gammaproteobacteria;o__Betaproteobacteriales;f__Burkholderiaceae;g__;s__
Otu000050	281	209	31	k__Bacteria;p__Planctomycetes;c__Planctomycetacia;o__Isosphaerales;f__Isosphaeraceae;g__;s__
Otu000051	287	245	5	k__Bacteria;p__Proteobacteria;c__Gammaproteobacteria;o__Aeromonadales;f__Aeromonadaceae;g__Aeromonas;s__
Otu000052	199	157	103	k__Bacteria;p__Planctomycetes;c__Planctomycetacia;o__Gemmatales;f__Gemmataceae;g__;s__
Otu000053	9	20	273	k__Bacteria;p__Rokubacteria;c__NC10;o__Rokubacteriales;f__;g__;s__
Otu000054	89	39	192	k__Bacteria;p__Proteobacteria;c__Deltaproteobacteria;o__NB1-j;f__;g__;s__
Otu000055	168	205	37	k__Bacteria;p__Planctomycetes;c__Planctomycetacia;o__Isosphaerales;f__Isosphaeraceae
Otu000056	209	213	7	k__Bacteria;p__Proteobacteria;c__Gammaproteobacteria
Otu000057	103	102	137	k__Bacteria;p__Proteobacteria;c__Gammaproteobacteria;o__Betaproteobacteriales;f__Burkholderiaceae;g__;s__
Otu000058	290	135	2	k__Bacteria;p__Fusobacteria;c__Fusobacteriia;o__Fusobacteriales;f__Fusobacteriaceae
Otu000059	233	183	4	k__Bacteria;p__Proteobacteria;c__Gammaproteobacteria;o__Aeromonadales;f__Aeromonadaceae;g__Aeromonas
Otu000060	53	67	179	k__Bacteria;p__Rokubacteria;c__NC10;o__Methylomirabilales;f__Methylomirabilaceae;g__Sh765B-TzT-35;s__
Otu000061	117	291	3	k__Bacteria;p__Bacteroidetes;c__Bacteroidia;o__Bacteroidales;f__Barnesiellaceae;g__;s__
Otu000062	11	26	225	k__Bacteria;p__Chloroflexi;c__Anaerolineae;o__Anaerolineales;f__Anaerolineaceae;g__;s__
Otu000063	12	20	226	k__Bacteria;p__Acidobacteria;c__Subgroup_6;o__;f__;g__;s__
Otu000064	104	94	126	k__Bacteria;p__Proteobacteria;c__Gammaproteobacteria;o__Betaproteobacteriales;f__Burkholderiaceae
Otu000065	54	73	162	k__Bacteria;p__Verrucomicrobia;c__Verrucomicrobiae;o__Verrucomicrobiales;f__Rubritaleaceae;g__Luteolibacter;s__
Otu000066	348	45	2	k__Bacteria;p__Tenericutes;c__Mollicutes
Otu000067	11	26	212	k__Bacteria;p__Rokubacteria;c__NC10;o__Methylomirabilales;f__Methylomirabilaceae;g__Sh765B-TzT-35;s__
Otu000068	7	12	222	k__Bacteria;p__Rokubacteria;c__NC10;o__Rokubacteriales;f__;g__;s__
Otu000069	359	23	2	k__Bacteria;p__Tenericutes;c__Mollicutes;o__Mycoplasmatales;f__Mycoplasmataceae;g__Mycoplasma
Otu000070	23	39	191	k__Bacteria;p__Proteobacteria;c__Gammaproteobacteria;o__Betaproteobacteriales;f__Rhodocyclaceae
Otu000071	110	122	85	k__Bacteria;p__Verrucomicrobia;c__Verrucomicrobiae;o__Pedosphaerales;f__Pedosphaeraceae;g__;s__
Otu000072	56	86	139	k__Bacteria;p__Proteobacteria;c__Alphaproteobacteria;o__Rhizobiales;f__Rhizobiales_Incertae_Sedis;g__;s__
Otu000073	87	86	119	k__Bacteria;p__Verrucomicrobia;c__Verrucomicrobiae;o__Verrucomicrobiales;f__Verrucomicrobiaceae;g__;s__
Otu000074	18	44	184	k__Bacteria;p__Proteobacteria;c__Gammaproteobacteria;o__Betaproteobacteriales;f__Rhodocyclaceae
Otu000075	65	50	149	k__Bacteria;p__Proteobacteria;c__Gammaproteobacteria;o__Betaproteobacteriales;f__Burkholderiaceae;g__;s__
Otu000076	34	50	166	k__Bacteria;p__Acidobacteria;c__Subgroup_6;o__;f__;g__;s__
Otu000077	111	57	111	k__Bacteria;p__Planctomycetes;c__Planctomycetacia;o__Pirellulales;f__Pirellulaceae;g__;s__
Otu000078	56	166	73	k__Bacteria;p__Actinobacteria;c__Actinobacteria;o__PeM15;f__;g__;s__
Otu000079	96	50	117	k__Bacteria;p__Proteobacteria;c__Gammaproteobacteria;o__Betaproteobacteriales;f__B1-7BS;g__;s__
Otu000080	84	62	116	k__Bacteria;p__Proteobacteria;c__Gammaproteobacteria;o__Betaproteobacteriales;f__SC-I-84;g__;s__
Otu000081	6	5	192	k__Bacteria
Otu000082	145	86	59	k__Bacteria;p__Verrucomicrobia;c__Verrucomicrobiae;o__Verrucomicrobiales;f__Rubritaleaceae;g__Luteolibacter;s__
Otu000083	10	16	181	k__Bacteria;p__Proteobacteria;c__Deltaproteobacteria;o__Sva0485;f__;g__;s__
Otu000084	142	49	80	k__Bacteria;p__Planctomycetes;c__Planctomycetacia;o__Pirellulales;f__Pirellulaceae;g__Candidatus_Anammoximicrobium;s__
Otu000085	10	78	141	k__Bacteria;p__Bacteroidetes;c__Bacteroidia;o__Flavobacteriales;f__Flavobacteriaceae;g__Flavobacterium
Otu000086	216	95	1	k__Bacteria;p__Cyanobacteria;c__Oxyphotobacteria;o__Chloroplast
Otu000087	146	163	2	k__Bacteria;p__Proteobacteria;c__Gammaproteobacteria;o__Aeromonadales
Otu000088	75	64	100	k__Bacteria;p__Proteobacteria;c__Gammaproteobacteria;o__Betaproteobacteriales;f__SC-I-84;g__;s__
Otu000089	77	198	17	k__Bacteria;p__Bacteroidetes;c__Bacteroidia;o__Flavobacteriales;f__Flavobacteriaceae;g__Flavobacterium
Otu000090	34	50	130	k__Bacteria;p__Proteobacteria;c__Gammaproteobacteria;o__Steroidobacterales;f__Steroidobacteraceae;g__;s__
Otu000091	7	8	168	k__Bacteria;p__Acidobacteria;c__Subgroup_17;o__;f__;g__;s__
Otu000092	149	138	2	k__Bacteria;p__Proteobacteria;c__Gammaproteobacteria;o__Aeromonadales;f__Aeromonadaceae;g__Aeromonas
Otu000093	10	9	163	k__Bacteria;p__Proteobacteria;c__Deltaproteobacteria;o__NB1-j;f__;g__;s__
Otu000094	9	13	160	k__Bacteria;p__Rokubacteria;c__NC10;o__Rokubacteriales;f__;g__;s__
Otu000095	69	54	99	k__Bacteria;p__Proteobacteria;c__Gammaproteobacteria;o__Betaproteobacteriales
Otu000096	29	15	145	k__Bacteria;p__Proteobacteria;c__Deltaproteobacteria;o__NB1-j;f__;g__;s__
Otu000097	66	84	81	k__Bacteria;p__Actinobacteria;c__Actinobacteria
Otu000098	48	158	43	k__Bacteria;p__Planctomycetes;c__Phycisphaerae;o__Tepidisphaerales;f__WD2101_soil_group;g__;s__
Otu000099	40	48	113	k__Bacteria;p__Proteobacteria;c__Alphaproteobacteria;o__Rhodobacterales;f__Rhodobacteraceae
Otu000100	42	86	88	k__Bacteria;p__Actinobacteria;c__Actinobacteria;o__PeM15;f__;g__;s__
Otu000101	7	13	152	k__Bacteria;p__Gemmatimonadetes;c__Gemmatimonadetes;o__Gemmatimonadales;f__Gemmatimonadaceae;g__;s__
Otu000102	128	112	17	k__Bacteria;p__Verrucomicrobia;c__Verrucomicrobiae;o__Verrucomicrobiales;f__Rubritaleaceae;g__Luteolibacter;s__
Otu000103	29	41	118	k__Bacteria;p__Proteobacteria;c__Alphaproteobacteria;o__Rhodospirillales;f__Rhodopirillaceae;g__Defluviicoccus;s__
Otu000104	14	18	141	k__Bacteria;p__Acidobacteria;c__Subgroup_6;o__;f__;g__;s__
Otu000105	107	142	9	k__Bacteria;p__Bacteroidetes;c__Bacteroidia;o__Flavobacteriales;f__Flavobacteriaceae;g__Flavobacterium
Otu000106	22	28	126	k__Bacteria;p__Proteobacteria;c__Alphaproteobacteria;o__Azospirillales
Otu000107	65	71	73	k__Bacteria;p__Proteobacteria;c__Alphaproteobacteria;o__Acetobacterales;f__Acetobacteraceae;g__Roseomonas
Otu000109	146	106	2	k__Bacteria;p__Proteobacteria;c__Gammaproteobacteria;o__Aeromonadales
Otu000110	47	49	92	k__Bacteria;p__Proteobacteria;c__Alphaproteobacteria;o__Rhizobiales
Otu000111	47	59	86	k__Bacteria;p__Proteobacteria;c__Gammaproteobacteria;o__Steroidobacterales;f__Steroidobacteraceae;g__;s__
Otu000112	18	16	128	k__Bacteria;p__Proteobacteria;c__Alphaproteobacteria;o__Dongiales;f__Dongiaceae;g__Dongia;s__
Otu000113	43	76	76	k__Bacteria;p__BRC1;c__soil_bacterium_WWH121;o__;f__;g__;s__
Otu000114	51	63	79	k__Bacteria;p__Proteobacteria;c__Gammaproteobacteria;o__Betaproteobacteriales;f__Burkholderiaceae;g__;s__
Otu000115	81	75	54	k__Bacteria;p__Verrucomicrobia;c__Verrucomicrobiae;o__Verrucomicrobiales;f__Verrucomicrobiaceae;g__;s__
Otu000116	51	49	84	k__Bacteria;p__Proteobacteria;c__Gammaproteobacteria;o__Betaproteobacteriales;f__SC-I-84;g__;s__
Otu000117	15	10	125	k__Bacteria;p__Acidobacteria;c__Subgroup_6;o__;f__;g__;s__
Otu000118	112	35	52	k__Bacteria;p__Planctomycetes;c__Planctomycetacia;o__Pirellulales;f__Pirellulaceae;g__Candidatus_Anammoximicrobium;s__
Otu000119	113	53	40	k__Bacteria;p__Verrucomicrobia;c__Verrucomicrobiae;o__Verrucomicrobiales;f__Rubritaleaceae;g__Luteolibacter
Otu000120	8	16	125	k__Bacteria;p__Proteobacteria;c__Gammaproteobacteria;o__Betaproteobacteriales;f__TRA3-20;g__;s__
Otu000121	38	32	97	k__Bacteria;p__Nitrospirae;c__Thermodesulfovibrionia;o__;f__;g__;s__
Otu000122	183	46	2	k__Bacteria
Otu000123	35	19	107	k__Bacteria;p__Planctomycetes;c__Planctomycetacia;o__Planctomycetales;f__Rubinisphaeraceae;g__SH-PL14;s__
Otu000124	12	22	117	k__Bacteria;p__Proteobacteria;c__Deltaproteobacteria;o__MBNT15
Otu000125	11	14	122	k__Bacteria;p__Acidobacteria;c__Subgroup_6;o__;f__;g__;s__
Otu000126	23	41	98	k__Bacteria;p__Proteobacteria;c__Gammaproteobacteria;o__Betaproteobacteriales;f__Burkholderiaceae;g__Rivibacter;s__
Otu000127	20	178	17	k__Bacteria;p__Proteobacteria;c__Gammaproteobacteria;o__Xanthomonadales;f__Xanthomonadaceae;g__Silanimonas;s__
Otu000128	20	36	101	k__Bacteria;p__Nitrospirae;c__Thermodesulfovibrionia;o__;f__;g__;s__
Otu000129	24	30	103	k__Bacteria;p__Nitrospirae;c__Thermodesulfovibrionia;o__;f__;g__;s__
Otu000130	67	51	64	k__Bacteria;p__Proteobacteria;c__Gammaproteobacteria;o__Betaproteobacteriales;f__Rhodocyclaceae
Otu000131	68	69	51	k__Bacteria;p__Planctomycetes;c__Planctomycetacia;o__Isosphaerales;f__Isosphaeraceae;g__;s__
Otu000133	7	183	17	k__Bacteria;p__Bacteroidetes;c__Bacteroidia;o__Bacteroidales;f__Rikenellaceae;g__Acetobacteroides;s__
Otu000134	37	35	87	k__Bacteria;p__Proteobacteria;c__Gammaproteobacteria;o__Steroidobacterales;f__Steroidobacteraceae;g__;s__
Otu000135	9	17	113	k__Bacteria;p__Proteobacteria;c__Gammaproteobacteria;o__Betaproteobacteriales;f__SC-I-84;g__;s__
Otu000136	13	14	112	k__Bacteria;p__Proteobacteria;c__Gammaproteobacteria;o__Betaproteobacteriales;f__B1-7BS;g__;s__
Otu000137	25	32	93	k__Bacteria;p__Proteobacteria;c__Alphaproteobacteria;o__Rhodospirillales;f__Rhodopirillaceae;g__Defluviicoccus;s__
Otu000138	8	10	116	k__Bacteria;p__Proteobacteria;c__Deltaproteobacteria;o__MBNT15
Otu000139	21	19	102	k__Bacteria;p__Proteobacteria;c__Gammaproteobacteria;o__Betaproteobacteriales;f__Nitrosomonadaceae;g__mle1-7;s__
Otu000140	27	36	89	k__Bacteria;p__Proteobacteria;c__Alphaproteobacteria;o__Rhodobacterales;f__Rhodobacteraceae;g__Tabrizicola;s__
Otu000141	122	74	8	k__Bacteria;p__Proteobacteria;c__Gammaproteobacteria;o__Betaproteobacteriales;f__Rhodocyclaceae;g__Uliginosibacterium
Otu000142	12	20	106	k__Bacteria;p__Nitrospirae;c__Thermodesulfovibrionia;o__;f__;g__;s__
Otu000143	98	63	29	k__Bacteria;p__Planctomycetes;c__Planctomycetacia;o__Pirellulales;f__Pirellulaceae;g__Pirellula;s__
Otu000144	136	46	16	k__Bacteria;p__Cyanobacteria;c__Oxyphotobacteria;o__Chloroplast
Otu000145	17	14	106	k__Bacteria;p__Proteobacteria;c__Deltaproteobacteria;o__Myxococcales;f__bacteriap25;g__;s__
Otu000146	63	75	40	k__Bacteria;p__Verrucomicrobia;c__Verrucomicrobiae;o__Chthoniobacterales;f__Chthoniobacteraceae;g__Chthoniobacter;s__
Otu000147	15	23	99	k__Bacteria;p__Acidobacteria;c__Subgroup_17;o__Acidobacteria_bacterium_RBG_16_70_10;f__;g__;s__
Otu000148	50	59	56	k__Bacteria;p__Gemmatimonadetes;c__Gemmatimonadetes;o__Gemmatimonadales;f__Gemmatimonadaceae;g__;s__
Otu000149	9	179	9	k__Bacteria;p__Bacteroidetes;c__Bacteroidia;o__Chitinophagales;f__Chitinophagaceae;g__Sediminibacterium
Otu000150	4	10	113	k__Bacteria;p__Chloroflexi;c__Anaerolineae;o__Anaerolineales;f__Anaerolineaceae;g__;s__
Otu000151	11	23	100	k__Bacteria;p__Proteobacteria;c__Deltaproteobacteria;o__NB1-j;f__;g__;s__
Otu000152	66	28	64	k__Bacteria;p__Planctomycetes;c__Planctomycetacia;o__Pirellulales;f__Pirellulaceae
Otu000153	33	42	75	k__Bacteria;p__Planctomycetes;c__Planctomycetacia;o__Planctomycetales;f__Rubinisphaeraceae;g__SH-PL14;s__
Otu000154	98	86	9	k__Bacteria;p__Firmicutes;c__Clostridia;o__Clostridiales;f__Peptostreptococcaceae;g__Romboutsia;s__
Otu000155	16	11	103	k__Bacteria;p__Rokubacteria;c__NC10;o__Rokubacteriales;f__;g__;s__
Otu000156	44	24	78	k__Bacteria;p__Proteobacteria;c__Gammaproteobacteria;o__Betaproteobacteriales;f__B1-7BS;g__;s__
Otu000157	36	58	62	k__Bacteria;p__Verrucomicrobia;c__Verrucomicrobiae;o__Verrucomicrobiales;f__Verrucomicrobiaceae;g__;s__
Otu000158	103	38	33	k__Bacteria;p__Proteobacteria;c__Gammaproteobacteria;o__Betaproteobacteriales;f__Rhodocyclaceae;g__Dechloromonas;s__
Otu000159	36	39	73	k__Bacteria;p__Verrucomicrobia;c__Verrucomicrobiae;o__Verrucomicrobiales;f__Verrucomicrobiaceae
Otu000160	46	31	69	k__Bacteria;p__Planctomycetes;c__Planctomycetacia;o__Isosphaerales;f__Isosphaeraceae;g__;s__
Otu000161	16	10	100	k__Bacteria;p__Proteobacteria;c__Deltaproteobacteria;o__MBNT15;f__;g__;s__
Otu000162	92	50	31	k__Bacteria;p__Verrucomicrobia;c__Verrucomicrobiae;o__Verrucomicrobiales;f__Rubritaleaceae;g__Luteolibacter
Otu000163	4	3	110	k__Bacteria;p__Chloroflexi;c__KD4-96;o__;f__;g__;s__
Otu000164	2	5	109	k__Bacteria;p__Acidobacteria;c__Holophagae;o__Subgroup_7;f__;g__;s__
Otu000165	8	21	94	k__Bacteria;p__Rokubacteria;c__NC10;o__Methylomirabilales;f__Methylomirabilaceae;g__Sh765B-TzT-35;s__
Otu000166	16	27	85	k__Bacteria;p__Proteobacteria;c__Deltaproteobacteria;o__NB1-j;f__;g__;s__
Otu000167	2	4	107	k__Bacteria;p__Proteobacteria;c__Deltaproteobacteria;o__Sva0485;f__;g__;s__
Otu000168	17	45	73	k__Bacteria;p__Chloroflexi;c__Anaerolineae;o__Caldilineales;f__Caldilineaceae;g__;s__
Otu000169	79	40	39	k__Bacteria;p__Planctomycetes;c__Planctomycetacia;o__Gemmatales;f__Gemmataceae;g__Gemmata;s__
Otu000170	26	21	81	k__Bacteria;p__Planctomycetes;c__Planctomycetacia;o__Pirellulales;f__Pirellulaceae;g__Pirellula;s__
Otu000171	45	30	64	k__Bacteria;p__Proteobacteria;c__Gammaproteobacteria;o__Betaproteobacteriales;f__Nitrosomonadaceae;g__Ellin6067;s__
Otu000172	22	27	80	k__Bacteria;p__Bacteroidetes;c__Bacteroidia;o__Chitinophagales;f__Chitinophagaceae;g__Dinghuibacter;s__
Otu000173	50	73	34	k__Bacteria;p__Verrucomicrobia;c__Verrucomicrobiae;o__Chthoniobacterales;f__Chthoniobacteraceae;g__Chthoniobacter;s__
Otu000174	19	29	78	k__Bacteria;p__Verrucomicrobia;c__Verrucomicrobiae;o__Chthoniobacterales;f__Xiphinematobacteraceae;g__Candidatus_Xiphinematobacter;s__
Otu000175	41	65	44	k__Bacteria;p__Chloroflexi;c__Anaerolineae;o__Caldilineales;f__Caldilineaceae
Otu000176	1	2	104	k__Bacteria;p__Acidobacteria;c__Subgroup_6;o__;f__;g__;s__
Otu000177	37	32	63	k__Bacteria;p__Proteobacteria;c__Gammaproteobacteria;o__Steroidobacterales;f__Steroidobacteraceae;g__;s__
Otu000178	8	19	88	k__Bacteria;p__Proteobacteria;c__Deltaproteobacteria;o__NB1-j;f__;g__;s__
Otu000179	39	44	54	k__Bacteria;p__Chloroflexi;c__KD4-96;o__;f__;g__;s__
Otu000180	152	15	3	k__Bacteria;p__Cyanobacteria;c__Oxyphotobacteria;o__Chloroplast
Otu000181	21	23	75	k__Bacteria;p__Acidobacteria;c__Subgroup_6;o__;f__;g__;s__
Otu000182	10	12	88	k__Bacteria;p__Verrucomicrobia;c__Verrucomicrobiae;o__Verrucomicrobiales;f__Rubritaleaceae;g__Luteolibacter
Otu000183	38	19	67	k__Bacteria;p__Proteobacteria;c__Deltaproteobacteria;o__NB1-j;f__;g__;s__
Otu000184	18	20	78	k__Bacteria;p__Proteobacteria;c__Deltaproteobacteria;o__Desulfuromonadales;f__Geobacteraceae;g__Geothermobacter
Otu000185	21	26	72	k__Bacteria;p__Acidobacteria;c__Subgroup_6
Otu000186	15	8	86	k__Bacteria;p__Proteobacteria;c__Alphaproteobacteria;o__Azospirillales;f__;g__;s__
Otu000187	92	41	19	k__Bacteria;p__Planctomycetes;c__Planctomycetacia;o__Gemmatales;f__Gemmataceae;g__Gemmata;s__
Otu000188	23	11	79	k__Bacteria;p__Verrucomicrobia;c__Verrucomicrobiae;o__Pedosphaerales;f__Pedosphaeraceae;g__ADurbBin063-1;s__
Otu000189	40	113	6	k__Bacteria;p__Bacteroidetes;c__Bacteroidia;o__Flavobacteriales;f__Flavobacteriaceae;g__Flavobacterium
Otu000190	6	48	64	k__Bacteria;p__Bacteroidetes;c__Bacteroidia;o__Flavobacteriales;f__Flavobacteriaceae;g__Flavobacterium
Otu000192	33	51	46	k__Bacteria;p__Proteobacteria;c__Alphaproteobacteria;o__Rhizobiales;f__Beijerinckiaceae;g__Methylocystis;s__
Otu000193	90	62	4	k__Bacteria;p__Proteobacteria;c__Gammaproteobacteria;o__Betaproteobacteriales;f__Chitinibacteraceae;g__Deefgea;s__Deefgea_chitinilytica
Otu000194	27	25	62	k__Bacteria;p__Patescibacteria;c__Saccharimonadia;o__Saccharimonadales;f__;g__;s__
Otu000195	120	35	1	k__Bacteria;p__Bacteroidetes;c__Bacteroidia;o__Bacteroidales;f__Bacteroidaceae;g__Bacteroides
Otu000196	46	83	16	k__Bacteria;p__Planctomycetes;c__Planctomycetacia;o__Gemmatales;f__Gemmataceae;g__Fimbriiglobus;s__
Otu000197	23	35	58	k__Bacteria;p__Proteobacteria;c__Alphaproteobacteria;o__Rhodobacterales;f__Rhodobacteraceae;g__Gemmobacter;s__
Otu000198	60	92	1	k__Bacteria;p__Bacteroidetes;c__Bacteroidia;o__Bacteroidales;f__Paludibacteraceae;g__Paludibacter;s__
Otu000200	10	13	78	k__Bacteria;p__Proteobacteria;c__Deltaproteobacteria;o__NB1-j;f__;g__;s__
Otu000201	32	55	39	k__Bacteria;p__Bacteroidetes;c__Bacteroidia;o__Flavobacteriales;f__Flavobacteriaceae;g__Flavobacterium
Otu000202	7	9	81	k__Bacteria;p__Nitrospirae;c__Thermodesulfovibrionia;o__;f__;g__;s__
Otu000203	28	51	41	k__Bacteria;p__Verrucomicrobia;c__Verrucomicrobiae;o__Verrucomicrobiales;f__Rubritaleaceae;g__Luteolibacter
Otu000204	4	90	31	k__Bacteria;p__Bacteroidetes;c__Bacteroidia;o__Flavobacteriales;f__Flavobacteriaceae;g__Flavobacterium
Otu000205	68	72	3	k__Bacteria;p__Proteobacteria;c__Gammaproteobacteria;o__Aeromonadales;f__Aeromonadaceae
Otu000206	30	40	45	k__Bacteria;p__BRC1;c__soil_bacterium_WWH121;o__;f__;g__;s__
Otu000207	14	8	73	k__Bacteria;p__Proteobacteria;c__Deltaproteobacteria;o__Myxococcales;f__bacteriap25;g__;s__
Otu000208	79	40	15	k__Bacteria;p__Planctomycetes;c__Planctomycetacia;o__Isosphaerales;f__Isosphaeraceae;g__;s__
Otu000209	6	12	75	k__Bacteria;p__Proteobacteria;c__Gammaproteobacteria;o__Betaproteobacteriales;f__Nitrosomonadaceae;g__MND1;s__
Otu000210	14	16	68	k__Bacteria;p__Proteobacteria;c__Deltaproteobacteria;o__NB1-j;f__;g__;s__
Otu000211	26	12	62	k__Bacteria;p__Acidobacteria;c__Holophagae;o__Subgroup_7;f__;g__;s__
Otu000212	17	14	66	k__Bacteria;p__Verrucomicrobia;c__Verrucomicrobiae;o__Pedosphaerales;f__Pedosphaeraceae;g__ADurbBin063-1;s__
Otu000213	18	28	56	k__Bacteria;p__Bacteroidetes;c__Bacteroidia;o__Chitinophagales;f__Chitinophagaceae;g__;s__
Otu000214	2	5	79	k__Bacteria;p__Dadabacteria;c__Dadabacteriia;o__Dadabacteriales
Otu000216	3	15	72	k__Bacteria;p__Chloroflexi;c__KD4-96;o__;f__;g__;s__
Otu000217	1	30	63	k__Bacteria;p__Planctomycetes;c__vadinHA49;o__;f__;g__;s__
Otu000218	25	56	33	k__Bacteria;p__Planctomycetes;c__Planctomycetacia;o__Isosphaerales;f__Isosphaeraceae;g__;s__
Otu000219	10	21	63	k__Bacteria;p__Proteobacteria;c__Deltaproteobacteria;o__NB1-j;f__;g__;s__
Otu000220	38	28	42	k__Bacteria;p__Proteobacteria;c__Alphaproteobacteria;o__Acetobacterales;f__Acetobacteraceae;g__Roseomonas;s__Roseomonas_sp_16-40
Otu000221	30	19	52	k__Bacteria;p__Planctomycetes;c__Planctomycetacia;o__Pirellulales;f__Pirellulaceae;g__Pirellula;s__
Otu000222	2	3	78	k__Bacteria;p__Acidobacteria;c__Subgroup_6;o__;f__;g__;s__
Otu000223	19	27	53	k__Bacteria;p__Proteobacteria;c__Gammaproteobacteria;o__Betaproteobacteriales;f__Burkholderiaceae;g__;s__
Otu000224	29	25	48	k__Bacteria;p__Proteobacteria;c__Gammaproteobacteria;o__Betaproteobacteriales;f__SC-I-84;g__;s__
Otu000225	14	5	68	k__Bacteria;p__Acidobacteria;c__Subgroup_17;o__;f__;g__;s__
Otu000226	70	20	25	k__Bacteria;p__Planctomycetes;c__Planctomycetacia;o__Pirellulales;f__Pirellulaceae
Otu000227	3	5	74	k__Bacteria;p__Bacteroidetes;c__Bacteroidia;o__Sphingobacteriales;f__Lentimicrobiaceae;g__;s__
Otu000228	44	14	42	k__Bacteria;p__Verrucomicrobia;c__Verrucomicrobiae;o__Verrucomicrobiales;f__Rubritaleaceae;g__Luteolibacter;s__
Otu000229	10	12	64	k__Bacteria;p__Planctomycetes;c__Planctomycetacia;o__Gemmatales;f__Gemmataceae;g__;s__
Otu000230	17	9	61	k__Bacteria;p__Nitrospinae;c__P9X2b3D02;o__;f__;g__;s__
Otu000232	11	7	65	k__Bacteria;p__Verrucomicrobia;c__Verrucomicrobiae;o__Chthoniobacterales;f__Chthoniobacteraceae;g__Candidatus_Udaeobacter;s__
Otu000233	59	33	21	k__Bacteria;p__Proteobacteria;c__Gammaproteobacteria;o__Cellvibrionales;f__Spongiibacteraceae;g__BD1-7_clade;s__
Otu000234	6	18	62	k__Bacteria;p__Bacteroidetes;c__Bacteroidia;o__Chitinophagales;f__Chitinophagaceae
Otu000235	4	1	73	k__Bacteria;p__Nitrospirae;c__Nitrospira;o__Nitrospirales;f__Nitrospiraceae;g__Nitrospira;s__
Otu000236	7	114	2	k__Bacteria;p__Proteobacteria;c__Deltaproteobacteria;o__Oligoflexales;f__Oligoflexaceae
Otu000237	63	24	22	k__Bacteria;p__Planctomycetes;c__Planctomycetacia;o__Gemmatales;f__Gemmataceae;g__Gemmata;s__
Otu000238	4	4	70	k__Bacteria;p__Rokubacteria;c__NC10;o__Rokubacteriales;f__;g__;s__
Otu000239	11	14	60	k__Bacteria;p__Planctomycetes;c__Planctomycetacia;o__Gemmatales;f__Gemmataceae;g__;s__
Otu000240	28	46	30	k__Bacteria;p__Planctomycetes;c__Planctomycetacia;o__Planctomycetales;f__Rubinisphaeraceae;g__;s__
Otu000241	3	4	70	k__Bacteria;p__Planctomycetes;c__Planctomycetacia;o__Gemmatales;f__Gemmataceae;g__Gemmata;s__
Otu000242	8	104	6	k__Bacteria;p__Proteobacteria;c__Gammaproteobacteria;o__Betaproteobacteriales;f__Burkholderiaceae;g__Polynucleobacter
Otu000244	17	32	44	k__Bacteria;p__Patescibacteria;c__Saccharimonadia;o__Saccharimonadales;f__;g__;s__
Otu000245	23	23	45	k__Bacteria;p__Actinobacteria;c__Coriobacteriia;o__OPB41;f__;g__;s__
Otu000246	71	48	1	k__Bacteria;p__Proteobacteria;c__Gammaproteobacteria;o__Aeromonadales;f__Aeromonadaceae
Otu000247	30	23	41	k__Bacteria;p__Proteobacteria;c__Gammaproteobacteria;o__Competibacterales;f__Competibacteraceae;g__Candidatus_Competibacter;s__
Otu000248	29	91	1	k__Bacteria;p__Proteobacteria;c__Gammaproteobacteria;o__Aeromonadales
Otu000249	19	19	50	k__Bacteria;p__Proteobacteria;c__Alphaproteobacteria;o__Rhodospirillales;f__Rhodopirillaceae;g__Defluviicoccus;s__
Otu000250	21	19	48	k__Bacteria;p__Proteobacteria;c__Deltaproteobacteria;o__Desulfarculales;f__Desulfarculaceae;g__Desulfatiglans;s__
Otu000251	5	11	63	k__Bacteria;p__Proteobacteria;c__Deltaproteobacteria;o__MBNT15;f__Deltaproteobacteria_bacterium_CSP1-8;g__;s__
Otu000252	14	13	56	k__Bacteria;p__Proteobacteria;c__Deltaproteobacteria;o__Desulfuromonadales;f__Geobacteraceae;g__Geothermobacter
Otu000253	8	8	62	k__Bacteria;p__Proteobacteria;c__Deltaproteobacteria;o__NB1-j;f__;g__;s__
Otu000254	14	31	44	k__Bacteria;p__Proteobacteria;c__Alphaproteobacteria;o__Rhizobiales;f__Hyphomicrobiaceae;g__Hyphomicrobium;s__
Otu000255	10	14	57	k__Bacteria;p__Planctomycetes;c__Planctomycetacia;o__Gemmatales;f__Gemmataceae
Otu000256	36	36	28	k__Bacteria;p__Actinobacteria;c__Acidimicrobiia;o__Microtrichales;f__Ilumatobacteraceae;g__Ilumatobacter;s__
Otu000257	42	22	32	k__Bacteria;p__Proteobacteria;c__Gammaproteobacteria;o__Betaproteobacteriales;f__Nitrosomonadaceae;g__Ellin6067;s__
Otu000258	20	28	42	k__Bacteria;p__Gemmatimonadetes;c__Gemmatimonadetes;o__Gemmatimonadales;f__Gemmatimonadaceae;g__;s__
Otu000259	57	49	7	k__Bacteria;p__Proteobacteria;c__Gammaproteobacteria;o__Betaproteobacteriales;f__Rhodocyclaceae;g__Niveibacterium;s__beta_proteobacterium_IMCC1729
Otu000260	28	54	22	k__Bacteria;p__Verrucomicrobia;c__Verrucomicrobiae;o__Chthoniobacterales;f__Chthoniobacteraceae;g__LD29;s__
Otu000261	8	21	53	k__Bacteria;p__Bacteroidetes;c__Bacteroidia;o__Bacteroidales;f__Prolixibacteraceae;g__;s__
Otu000262	14	21	49	k__Bacteria;p__Actinobacteria;c__Thermoleophilia;o__Gaiellales;f__Gaiellaceae;g__Gaiella;s__
Otu000263	19	26	43	k__Bacteria;p__Planctomycetes;c__Planctomycetacia;o__Planctomycetales;f__Rubinisphaeraceae;g__SH-PL14;s__
Otu000265	22	19	45	k__Bacteria;p__Proteobacteria;c__Gammaproteobacteria;o__Betaproteobacteriales;f__SC-I-84;g__;s__
Otu000267	21	18	45	k__Bacteria;p__Proteobacteria;c__Gammaproteobacteria;o__Betaproteobacteriales;f__SC-I-84;g__;s__
Otu000268	8	27	47	k__Bacteria;p__Nitrospirae;c__Thermodesulfovibrionia;o__;f__;g__;s__
Otu000269	57	30	16	k__Bacteria;p__Planctomycetes;c__Planctomycetacia;o__Planctomycetales;f__Schlesneriaceae;g__Schlesneria;s__
Otu000270	3	6	63	k__Bacteria;p__Gemmatimonadetes;c__Gemmatimonadetes;o__Gemmatimonadales;f__Gemmatimonadaceae;g__;s__
Otu000271	19	22	43	k__Bacteria;p__Chloroflexi;c__Anaerolineae;o__Caldilineales;f__Caldilineaceae;g__;s__
Otu000272	16	38	35	k__Bacteria;p__Verrucomicrobia;c__Verrucomicrobiae;o__Verrucomicrobiales;f__Rubritaleaceae;g__Luteolibacter;s__
Otu000273	7	13	55	k__Bacteria;p__Bacteroidetes;c__Bacteroidia;o__Bacteroidales;f__Prolixibacteraceae;g__;s__
Otu000274	3	4	63	k__Bacteria;p__Rokubacteria;c__NC10;o__Rokubacteriales;f__;g__;s__
Otu000275	21	9	49	k__Bacteria;p__Proteobacteria;c__Deltaproteobacteria;o__Syntrophobacterales;f__Syntrophaceae;g__;s__
Otu000276	3	11	58	k__Bacteria;p__Proteobacteria;c__Deltaproteobacteria;o__Desulfobacterales;f__Desulfobulbaceae;g__Desulfobulbus;s__
Otu000277	6	5	60	k__Bacteria;p__Chloroflexi;c__Anaerolineae;o__Anaerolineales;f__Anaerolineaceae;g__;s__
Otu000278	12	20	47	k__Bacteria;p__Verrucomicrobia;c__Verrucomicrobiae;o__Chthoniobacterales;f__Chthoniobacteraceae;g__Chthoniobacter;s__
Otu000279	5	11	56	k__Bacteria;p__Proteobacteria;c__Deltaproteobacteria;o__Sva0485;f__;g__;s__
Otu000280	1	7	61	k__Bacteria;p__Acidobacteria;c__Subgroup_6;o__;f__;g__;s__
Otu000281	8	14	53	k__Bacteria;p__Proteobacteria;c__Deltaproteobacteria;o__Myxococcales;f__Sandaracinaceae;g__;s__
Otu000282	30	16	38	k__Bacteria;p__Proteobacteria;c__Deltaproteobacteria;o__Desulfobacterales;f__Desulfobacteraceae;g__Sva0081_sediment_group
Otu000283	8	18	50	k__Bacteria;p__Acidobacteria;c__Subgroup_6;o__;f__;g__;s__
Otu000284	4	13	55	k__Bacteria;p__Acidobacteria;c__Subgroup_6;o__;f__;g__;s__
Otu000285	15	21	43	k__Bacteria;p__Acidobacteria;c__Holophagae;o__Subgroup_7;f__;g__;s__
Otu000286	30	31	27	k__Bacteria;p__Proteobacteria;c__Deltaproteobacteria
Otu000287	19	17	43	k__Bacteria;p__Proteobacteria;c__Deltaproteobacteria;o__Desulfobacterales;f__Desulfobacteraceae;g__Sva0081_sediment_group
Otu000288	22	19	40	k__Bacteria;p__Proteobacteria;c__Gammaproteobacteria;o__Steroidobacterales;f__Steroidobacteraceae;g__;s__
Otu000289	11	9	52	k__Bacteria;p__Actinobacteria;c__MB-A2-108;o__Actinobacteria_bacterium_RBG_19FT_COMBO_70_19;f__;g__;s__
Otu000290	2	1	62	k__Bacteria;p__Acidobacteria;c__Subgroup_6;o__;f__;g__;s__
Otu000291	2	5	59	k__Bacteria;p__Proteobacteria;c__Deltaproteobacteria;o__Desulfovibrionales;f__Desulfomicrobiaceae;g__Desulfomicrobium
Otu000292	1	2	61	k__Bacteria;p__Acidobacteria;c__Subgroup_6;o__;f__;g__;s__
Otu000294	1	1	62	k__Bacteria
Otu000295	24	26	32	k__Bacteria;p__Verrucomicrobia;c__Verrucomicrobiae;o__Verrucomicrobiales;f__Rubritaleaceae
Otu000296	4	4	57	k__Bacteria;p__Proteobacteria;c__Gammaproteobacteria;o__Betaproteobacteriales;f__Nitrosomonadaceae;g__MND1;s__
Otu000297	19	65	12	k__Bacteria;p__Proteobacteria;c__Gammaproteobacteria;o__Betaproteobacteriales;f__Chitinibacteraceae;g__Chitinibacter;s__
Otu000298	10	28	40	k__Bacteria;p__Acidobacteria;c__Subgroup_6;o__;f__;g__;s__
Otu000299	28	33	26	k__Bacteria;p__Verrucomicrobia;c__Verrucomicrobiae;o__Verrucomicrobiales;f__Verrucomicrobiaceae;g__;s__
Otu000300	5	6	55	k__Bacteria;p__Planctomycetes;c__Planctomycetacia;o__Pirellulales;f__Pirellulaceae;g__Pirellula;s__
Otu000301	9	25	41	k__Bacteria;p__Proteobacteria;c__Deltaproteobacteria;o__MBNT15;f__Deltaproteobacteria_bacterium_CSP1-8;g__;s__
Otu000302	41	22	24	k__Bacteria;p__Planctomycetes;c__Planctomycetacia;o__Planctomycetales;f__Rubinisphaeraceae;g__;s__
Otu000303	39	18	27	k__Bacteria;p__Planctomycetes;c__Planctomycetacia;o__Isosphaerales;f__Isosphaeraceae
Otu000304	10	12	49	k__Bacteria;p__Acidobacteria;c__Subgroup_18;o__;f__;g__;s__
Otu000305	42	49	7	k__Bacteria;p__Proteobacteria;c__Gammaproteobacteria;o__Betaproteobacteriales;f__Nitrosomonadaceae;g__;s__
Otu000306	4	13	51	k__Bacteria;p__Planctomycetes;c__Planctomycetacia;o__Gemmatales;f__Gemmataceae;g__Fimbriiglobus;s__
Otu000307	21	14	40	k__Bacteria;p__Proteobacteria;c__Gammaproteobacteria;o__Betaproteobacteriales;f__Nitrosomonadaceae;g__Ellin6067;s__
Otu000308	1	4	57	k__Bacteria;p__Acidobacteria;c__Subgroup_18;o__;f__;g__;s__
Otu000312	17	19	38	k__Bacteria;p__Proteobacteria;c__Gammaproteobacteria;o__Betaproteobacteriales;f__Burkholderiaceae
Otu000313	39	16	27	k__Bacteria;p__Proteobacteria;c__Gammaproteobacteria;o__Competibacterales;f__Competibacteraceae;g__Candidatus_Competibacter;s__
Otu000314	17	17	39	k__Bacteria;p__Chloroflexi;c__Anaerolineae;o__SBR1031;f__;g__;s__
Otu000315	21	7	43	k__Bacteria;p__Planctomycetes;c__Planctomycetacia;o__Pirellulales;f__Pirellulaceae;g__;s__
Otu000316	13	14	43	k__Bacteria;p__Proteobacteria;c__Gammaproteobacteria;o__Betaproteobacteriales;f__Rhodocyclaceae
Otu000317	13	12	44	k__Bacteria;p__Proteobacteria;c__Gammaproteobacteria;o__Betaproteobacteriales;f__Nitrosomonadaceae;g__MND1;s__
Otu000318	38	23	22	k__Bacteria;p__Verrucomicrobia;c__Verrucomicrobiae;o__Verrucomicrobiales;f__Rubritaleaceae;g__Luteolibacter;s__
Otu000319	3	13	49	k__Bacteria;p__Acidobacteria;c__Subgroup_6;o__;f__;g__;s__
Otu000320	3	4	54	k__Bacteria;p__Acidobacteria;c__Subgroup_6;o__;f__;g__;s__
Otu000321	72	12	8	k__Bacteria;p__Planctomycetes;c__Planctomycetacia;o__Planctomycetales;f__;g__;s__
Otu000322	60	22	9	k__Bacteria;p__Planctomycetes;c__Phycisphaerae;o__Tepidisphaerales;f__WD2101_soil_group;g__;s__
Otu000323	48	10	23	k__Bacteria;p__Planctomycetes;c__Planctomycetacia;o__Pirellulales;f__Pirellulaceae;g__Blastopirellula;s__
Otu000324	13	35	29	k__Bacteria;p__Proteobacteria;c__Gammaproteobacteria;o__Steroidobacterales;f__Steroidobacteraceae;g__;s__
Otu000325	22	26	29	k__Bacteria;p__Verrucomicrobia;c__Verrucomicrobiae;o__Verrucomicrobiales;f__Rubritaleaceae;g__Luteolibacter
Otu000326	26	20	30	k__Bacteria;p__Planctomycetes;c__Planctomycetacia;o__Planctomycetales;f__;g__;s__
Otu000327	19	4	44	k__Archaea;p__Euryarchaeota;c__Thermoplasmata;o__Methanomassiliicoccales;f__Methanomassiliicoccaceae;g__;s__
Otu000328	27	16	31	k__Bacteria;p__Proteobacteria;c__Gammaproteobacteria;o__Betaproteobacteriales;f__B1-7BS;g__;s__
Otu000330	21	21	31	k__Bacteria;p__Proteobacteria;c__Gammaproteobacteria;o__Methylococcales;f__Methylomonaceae;g__Crenothrix;s__
Otu000331	4	12	47	k__Bacteria;p__Bacteroidetes;c__Ignavibacteria;o__OPB56
Otu000332	17	20	34	k__Bacteria;p__Chloroflexi;c__Anaerolineae;o__SJA-15;f__;g__;s__
Otu000333	3	6	51	k__Bacteria;p__Acidobacteria;c__Subgroup_6
Otu000334	2	8	50	k__Bacteria;p__Planctomycetes;c__Planctomycetacia;o__Planctomycetales;f__;g__;s__
Otu000335	46	46	1	k__Bacteria;p__Proteobacteria;c__Gammaproteobacteria;o__Aeromonadales;f__Aeromonadaceae;g__Aeromonas
Otu000336	10	4	47	k__Bacteria;p__Proteobacteria;c__Deltaproteobacteria;o__Desulfarculales;f__Desulfarculaceae;g__;s__
Otu000337	34	51	4	k__Bacteria;p__Bacteroidetes;c__Bacteroidia;o__Flavobacteriales;f__Flavobacteriaceae;g__Flavobacterium
Otu000338	38	31	13	k__Bacteria;p__Planctomycetes;c__Planctomycetacia;o__Planctomycetales;f__Rubinisphaeraceae;g__;s__
Otu000339	2	8	48	k__Bacteria;p__Proteobacteria;c__Gammaproteobacteria;o__Betaproteobacteriales;f__SC-I-84;g__;s__
Otu000341	28	34	17	k__Bacteria;p__Proteobacteria;c__Alphaproteobacteria;o__Acetobacterales;f__Acetobacteraceae;g__Roseomonas;s__bacterium_EM0302
Otu000342	9	6	45	k__Bacteria;p__Bacteroidetes;c__Bacteroidia;o__Bacteroidales;f__Marinilabiliaceae;g__Cytophaga_xylanolytica_group;s__
Otu000343	25	24	24	k__Bacteria;p__Proteobacteria;c__Alphaproteobacteria
Otu000344	4	27	35	k__Bacteria;p__Chloroflexi;c__Anaerolineae;o__Caldilineales;f__Caldilineaceae;g__;s__
Otu000345	6	10	44	k__Bacteria;p__Nitrospirae;c__Thermodesulfovibrionia;o__;f__;g__;s__
Otu000346	5	5	47	k__Bacteria;p__Proteobacteria;c__Deltaproteobacteria;o__Myxococcales;f__Archangiaceae;g__Anaeromyxobacter;s__
Otu000347	9	4	45	k__Bacteria;p__Proteobacteria;c__Gammaproteobacteria;o__Betaproteobacteriales;f__SC-I-84;g__;s__
Otu000348	32	21	21	k__Bacteria;p__Actinobacteria;c__Acidimicrobiia;o__Microtrichales;f__Ilumatobacteraceae;g__;s__
Otu000349	73	12	1	k__Bacteria;p__Cyanobacteria;c__Oxyphotobacteria;o__Chloroplast
Otu000350	6	9	43	k__Bacteria;p__Proteobacteria;c__Gammaproteobacteria;o__Betaproteobacteriales;f__Burkholderiaceae
Otu000351	16	44	17	k__Bacteria;p__Proteobacteria;c__Gammaproteobacteria;o__Enterobacteriales;f__Enterobacteriaceae
Otu000352	38	36	8	k__Bacteria;p__Planctomycetes;c__Planctomycetacia;o__Gemmatales;f__Gemmataceae;g__Fimbriiglobus;s__
Otu000353	5	6	45	k__Bacteria;p__Proteobacteria;c__Alphaproteobacteria;o__;f__;g__;s__
Otu000354	10	2	44	k__Bacteria;p__Planctomycetes;c__Planctomycetacia;o__Pirellulales;f__Pirellulaceae;g__Pirellula;s__
Otu000355	19	40	16	k__Bacteria;p__Planctomycetes;c__Planctomycetacia;o__Isosphaerales;f__Isosphaeraceae;g__;s__
Otu000356	10	11	39	k__Bacteria;p__Actinobacteria;c__Thermoleophilia;o__Gaiellales;f__Gaiellaceae;g__Gaiella;s__
Otu000358	1	38	28	k__Bacteria;p__Proteobacteria;c__Gammaproteobacteria;o__Betaproteobacteriales;f__Burkholderiaceae;g__;s__
Otu000359	10	19	34	k__Bacteria;p__Proteobacteria;c__Alphaproteobacteria;o__Rhodobacterales;f__Rhodobacteraceae;g__Tropicimonas;s__
Otu000361	17	7	36	k__Bacteria;p__Planctomycetes;c__Planctomycetacia;o__Pirellulales;f__Pirellulaceae;g__Rhodopirellula;s__
Otu000362	4	9	43	k__Bacteria;p__Acidobacteria;c__Subgroup_6;o__;f__;g__;s__
Otu000364	23	41	12	k__Bacteria;p__Planctomycetes;c__Phycisphaerae;o__Tepidisphaerales;f__WD2101_soil_group;g__;s__
Otu000365	1	1	49	k__Bacteria;p__Proteobacteria;c__Gammaproteobacteria;o__Betaproteobacteriales;f__Burkholderiaceae;g__Rhodoferax;s__
Otu000366	3	3	47	k__Bacteria;p__Proteobacteria;c__Gammaproteobacteria;o__PLTA13;f__;g__;s__
Otu000367	2	4	46	k__Bacteria;p__Firmicutes;c__Clostridia;o__Clostridiales;f__Family_XIII;g__Eubacterium_brachy_group;s__
Otu000368	2	1	48	k__Bacteria;p__Acidobacteria;c__Subgroup_6;o__;f__;g__;s__
Otu000369	20	18	27	k__Bacteria;p__Actinobacteria;c__Actinobacteria
Otu000370	8	10	39	k__Bacteria;p__Proteobacteria;c__Deltaproteobacteria;o__Desulfarculales;f__Desulfarculaceae;g__;s__
Otu000371	6	10	40	k__Bacteria;p__Proteobacteria;c__Deltaproteobacteria
Otu000372	5	4	44	k__Bacteria;p__Chloroflexi;c__Anaerolineae;o__SJA-15;f__;g__;s__
Otu000373	34	29	11	k__Bacteria;p__Planctomycetes;c__Planctomycetacia;o__Pirellulales;f__Pirellulaceae;g__Pirellula;s__
Otu000374	6	6	41	k__Bacteria;p__Proteobacteria;c__Deltaproteobacteria;o__NB1-j;f__;g__;s__
Otu000375	13	10	35	k__Bacteria;p__Verrucomicrobia;c__Verrucomicrobiae;o__Pedosphaerales;f__Pedosphaeraceae;g__ADurbBin063-1;s__
Otu000376	14	23	27	k__Bacteria;p__Rokubacteria;c__NC10;o__Methylomirabilales;f__Methylomirabilaceae;g__Sh765B-TzT-35;s__
Otu000377	2	4	45	k__Bacteria;p__Acidobacteria;c__Subgroup_6;o__;f__;g__;s__
Otu000378	1	11	41	k__Bacteria;p__Acidobacteria;c__Subgroup_6;o__;f__;g__;s__
Otu000379	3	10	41	k__Bacteria;p__Acidobacteria;c__Subgroup_6;o__;f__;g__;s__
Otu000380	8	6	41	k__Bacteria;p__Bacteroidetes;c__Bacteroidia;o__Chitinophagales;f__Chitinophagaceae
Otu000381	1	3	46	k__Bacteria;p__Proteobacteria;c__Deltaproteobacteria;o__NB1-j;f__;g__;s__
Otu000382	6	7	41	k__Bacteria;p__Proteobacteria;c__Gammaproteobacteria;o__Betaproteobacteriales;f__Nitrosomonadaceae;g__mle1-7;s__
Otu000383	40	22	11	k__Bacteria;p__Verrucomicrobia;c__Verrucomicrobiae;o__Chthoniobacterales;f__Chthoniobacteraceae;g__Chthoniobacter;s__
Otu000384	10	13	35	k__Bacteria;p__Planctomycetes;c__Planctomycetacia;o__Pirellulales;f__Pirellulaceae;g__Pir4_lineage;s__
Otu000385	5	8	41	k__Bacteria;p__Proteobacteria;c__Alphaproteobacteria;o__Rhizobiales;f__Xanthobacteraceae;g__Bradyrhizobium
Otu000386	4	9	41	k__Bacteria;p__Bacteroidetes;c__Bacteroidia;o__Bacteroidales;f__Marinilabiliaceae;g__Cytophaga_xylanolytica_group;s__
Otu000387	37	22	13	k__Bacteria;p__Proteobacteria;c__Gammaproteobacteria;o__Betaproteobacteriales;f__Nitrosomonadaceae;g__oc32;s__
Otu000388	15	20	27	k__Bacteria;p__Bacteroidetes;c__Bacteroidia;o__Cytophagales;f__Microscillaceae;g__OLB12;s__
Otu000389	4	1	45	k__Bacteria;p__Proteobacteria;c__Deltaproteobacteria;o__Myxococcales;f__BIrii41;g__;s__
Otu000390	4	6	42	k__Bacteria;p__Proteobacteria;c__Alphaproteobacteria;o__Reyranellales;f__Reyranellaceae;g__;s__
Otu000391	4	5	42	k__Bacteria;p__Proteobacteria;c__Deltaproteobacteria;o__NB1-j;f__;g__;s__
Otu000392	12	12	33	k__Bacteria;p__Chloroflexi;c__Anaerolineae;o__Caldilineales;f__Caldilineaceae;g__;s__
Otu000393	26	17	21	k__Bacteria;p__Verrucomicrobia;c__Verrucomicrobiae;o__Verrucomicrobiales;f__Rubritaleaceae;g__;s__
Otu000394	13	29	22	k__Bacteria;p__Verrucomicrobia;c__Verrucomicrobiae;o__Chthoniobacterales;f__Chthoniobacteraceae;g__Chthoniobacter;s__
Otu000395	40	24	8	k__Bacteria;p__Verrucomicrobia;c__Verrucomicrobiae;o__Pedosphaerales;f__Pedosphaeraceae;g__;s__
Otu000396	9	6	38	k__Bacteria;p__Proteobacteria;c__Deltaproteobacteria;o__Syntrophobacterales;f__Syntrophobacteraceae;g__;s__
Otu000397	36	39	2	k__Bacteria;p__Proteobacteria;c__Gammaproteobacteria;o__Alteromonadales;f__;g__;s__
Otu000399	26	26	15	k__Bacteria;p__Proteobacteria;c__Gammaproteobacteria;o__Cellvibrionales;f__Spongiibacteraceae;g__BD1-7_clade;s__
Otu000400	7	6	39	k__Bacteria;p__Chloroflexi;c__Anaerolineae;o__1-20;f__;g__;s__
Otu000401	8	9	36	k__Bacteria;p__Proteobacteria;c__Gammaproteobacteria;o__SZB30;f__;g__;s__
Otu000402	12	12	32	k__Bacteria;p__Verrucomicrobia;c__Verrucomicrobiae;o__Pedosphaerales;f__Pedosphaeraceae
Otu000403	3	7	40	k__Bacteria;p__Proteobacteria;c__Gammaproteobacteria;o__CCD24;f__;g__;s__
Otu000404	13	4	36	k__Bacteria;p__Acidobacteria;c__Holophagae;o__Subgroup_7;f__;g__;s__
Otu000405	10	13	32	k__Bacteria;p__Verrucomicrobia;c__Verrucomicrobiae;o__Verrucomicrobiales;f__Verrucomicrobiaceae;g__;s__
Otu000406	4	3	41	k__Bacteria;p__Actinobacteria;c__MB-A2-108;o__;f__;g__;s__
Otu000407	10	6	36	k__Bacteria;p__Acidobacteria;c__Subgroup_17
Otu000408	42	18	10	k__Bacteria;p__Planctomycetes;c__Planctomycetacia;o__Gemmatales;f__Gemmataceae;g__Fimbriiglobus;s__
Otu000409	22	28	15	k__Bacteria;p__Planctomycetes;c__Planctomycetacia;o__Gemmatales;f__Gemmataceae;g__Telmatocola;s__
Otu000410	6	4	39	k__Bacteria;p__Gemmatimonadetes;c__Gemmatimonadetes;o__Gemmatimonadales;f__Gemmatimonadaceae;g__;s__
Otu000411	7	12	34	k__Bacteria;p__Acidobacteria;c__Acidobacteriia;o__Solibacterales;f__Solibacteraceae_Subgroup_3;g__Paludibaculum;s__
Otu000412	6	5	38	k__Bacteria;p__Chloroflexi;c__Anaerolineae;o__Caldilineales;f__Caldilineaceae;g__;s__
Otu000413	3	2	42	k__Bacteria;p__Acidobacteria;c__Subgroup_6;o__;f__;g__;s__
Otu000414	6	12	34	k__Bacteria;p__Acidobacteria;c__Acidobacteriia;o__Solibacterales;f__Solibacteraceae_Subgroup_3;g__Paludibaculum;s__
Otu000417	13	11	30	k__Bacteria;p__Proteobacteria;c__Alphaproteobacteria;o__Rhodospirillales;f__Rhodopirillaceae;g__Defluviicoccus;s__
Otu000418	1	2	43	k__Bacteria;p__Firmicutes;c__Clostridia;o__Clostridiales;f__Heliobacteriaceae;g__Hydrogenispora;s__
Otu000419	1	4	42	k__Bacteria;p__Nitrospirae;c__Thermodesulfovibrionia;o__;f__;g__;s__
Otu000420	12	10	31	k__Bacteria;p__Proteobacteria;c__Gammaproteobacteria;o__Betaproteobacteriales;f__Rhodocyclaceae;g__Sulfuritalea;s__
Otu000421	2	6	40	k__Bacteria;p__Chloroflexi;c__KD4-96;o__;f__;g__;s__
Otu000422	30	11	20	k__Bacteria;p__Planctomycetes;c__Planctomycetacia;o__Gemmatales;f__Gemmataceae;g__;s__
Otu000423	32	19	14	k__Bacteria;p__Planctomycetes;c__Phycisphaerae;o__Tepidisphaerales;f__WD2101_soil_group;g__;s__
Otu000424	15	14	27	k__Bacteria;p__Chloroflexi;c__Anaerolineae;o__Caldilineales;f__Caldilineaceae;g__;s__
Otu000426	3	37	21	k__Bacteria;p__Bacteroidetes;c__Bacteroidia;o__Flavobacteriales;f__Flavobacteriaceae;g__Flavobacterium
Otu000428	17	17	23	k__Bacteria;p__Cyanobacteria;c__Oxyphotobacteria;o__Synechococcales;f__Cyanobiaceae;g__Cyanobium_PCC-6307;s__
Otu000429	14	13	27	k__Bacteria;p__Bacteroidetes;c__Bacteroidia;o__Cytophagales;f__Microscillaceae;g__OLB12;s__
Otu000431	12	15	27	k__Bacteria;p__Verrucomicrobia;c__Verrucomicrobiae;o__Verrucomicrobiales;f__Rubritaleaceae;g__Luteolibacter;s__
Otu000432	7	45	12	k__Bacteria;p__Bacteroidetes;c__Bacteroidia;o__Bacteroidales;f__Prolixibacteraceae;g__BSV13;s__
Otu000433	24	15	19	k__Bacteria;p__Planctomycetes;c__Planctomycetacia;o__Gemmatales;f__Gemmataceae;g__;s__
Otu000434	4	2	39	k__Bacteria;p__Rokubacteria;c__NC10;o__Rokubacteriales;f__;g__;s__
Otu000435	1	1	41	k__Bacteria;p__Actinobacteria;c__MB-A2-108
Otu000436	21	12	23	k__Bacteria;p__Planctomycetes;c__Planctomycetacia;o__Isosphaerales;f__Isosphaeraceae;g__Aquisphaera;s__
Otu000438	1	16	31	k__Bacteria;p__Planctomycetes;c__Planctomycetacia;o__Gemmatales;f__Gemmataceae;g__Zavarzinella;s__
Otu000440	1	12	34	k__Bacteria;p__Acidobacteria;c__Subgroup_6;o__;f__;g__;s__
Otu000441	17	17	21	k__Bacteria;p__Verrucomicrobia;c__Verrucomicrobiae;o__Pedosphaerales;f__Pedosphaeraceae;g__;s__
Otu000442	2	4	38	k__Bacteria;p__Proteobacteria;c__Deltaproteobacteria;o__Desulfuromonadales;f__Geobacteraceae;g__Geobacter;s__
Otu000443	15	3	31	k__Bacteria;p__Proteobacteria;c__Gammaproteobacteria;o__SZB30;f__;g__;s__
Otu000444	5	1	38	k__Bacteria;p__Rokubacteria;c__NC10;o__Rokubacteriales;f__;g__;s__
Otu000445	5	8	34	k__Bacteria;p__Proteobacteria;c__Gammaproteobacteria;o__Betaproteobacteriales;f__Hydrogenophilaceae;g__Thiobacillus;s__
Otu000446	15	19	21	k__Bacteria;p__Chloroflexi;c__Anaerolineae;o__SJA-15;f__;g__;s__
Otu000447	1	6	37	k__Bacteria;p__Acidobacteria;c__Subgroup_6
Otu000448	23	21	15	k__Bacteria;p__Proteobacteria;c__Gammaproteobacteria;o__Aeromonadales;f__Aeromonadaceae;g__Aeromonas
Otu000449	2	4	37	k__Bacteria;p__Proteobacteria;c__Gammaproteobacteria;o__Betaproteobacteriales;f__Burkholderiaceae
Otu000451	2	1	39	k__Bacteria;p__Firmicutes;c__Negativicutes;o__Selenomonadales;f__Veillonellaceae;g__;s__
Otu000452	2	1	39	k__Bacteria;p__Planctomycetes;c__Planctomycetacia;o__Gemmatales;f__Gemmataceae;g__;s__
Otu000453	10	25	20	k__Bacteria;p__Proteobacteria;c__Gammaproteobacteria;o__Betaproteobacteriales;f__Rhodocyclaceae;g__Propionivibrio;s__
Otu000454	10	44	8	k__Bacteria;p__Planctomycetes;c__Planctomycetacia;o__Gemmatales;f__Gemmataceae;g__;s__
Otu000455	2	1	39	k__Bacteria;p__Acidobacteria;c__Subgroup_9;o__;f__;g__;s__
Otu000456	2	9	34	k__Bacteria;p__Planctomycetes;c__Planctomycetacia;o__Pirellulales;f__Pirellulaceae;g__Pir2_lineage;s__
Otu000457	35	6	16	k__Bacteria;p__Planctomycetes;c__Planctomycetacia;o__Pirellulales;f__Pirellulaceae;g__Pirellula
Otu000458	31	11	15	k__Bacteria;p__Planctomycetes;c__Planctomycetacia;o__Pirellulales;f__Pirellulaceae;g__Blastopirellula;s__
Otu000459	13	16	23	k__Bacteria;p__Acidobacteria;c__Acidobacteriia;o__Solibacterales;f__Solibacteraceae_Subgroup_3;g__Paludibaculum;s__
Otu000460	1	1	39	k__Bacteria;p__Acidobacteria;c__Subgroup_17;o__;f__;g__;s__
Otu000461	2	1	38	k__Bacteria;p__Proteobacteria;c__Deltaproteobacteria;o__Desulfuromonadales;f__MA-28-I98C;g__;s__
Otu000462	15	34	11	k__Bacteria;p__Verrucomicrobia;c__Verrucomicrobiae;o__Verrucomicrobiales;f__Rubritaleaceae;g__Luteolibacter;s__
Otu000463	13	29	15	k__Bacteria;p__Firmicutes;c__Clostridia;o__Clostridiales;f__Ruminococcaceae;g__Faecalibacterium;s__
Otu000464	33	26	5	k__Bacteria;p__Firmicutes;c__Clostridia;o__Clostridiales;f__Clostridiaceae_1;g__Clostridium_sensu_stricto_13
Otu000465	2	3	36	k__Bacteria;p__Proteobacteria;c__Alphaproteobacteria;o__;f__;g__;s__
Otu000466	11	12	25	k__Bacteria;p__Chloroflexi;c__Anaerolineae;o__Caldilineales;f__Caldilineaceae;g__;s__
Otu000468	42	23	1	k__Bacteria;p__Verrucomicrobia;c__Verrucomicrobiae;o__;f__;g__;s__
Otu000469	17	3	27	k__Bacteria;p__Bacteroidetes;c__Ignavibacteria;o__Ignavibacteriales;f__Ignavibacteriaceae;g__Ignavibacterium;s__
Otu000470	34	15	10	k__Bacteria;p__Planctomycetes;c__Planctomycetacia;o__Pirellulales;f__Pirellulaceae
Otu000471	24	9	20	k__Bacteria;p__Planctomycetes;c__Planctomycetacia;o__Pirellulales;f__Pirellulaceae;g__Candidatus_Anammoximicrobium;s__
Otu000472	3	11	31	k__Bacteria;p__Proteobacteria;c__Deltaproteobacteria;o__Desulfarculales;f__Desulfarculaceae;g__;s__
Otu000473	15	22	17	k__Bacteria;p__Planctomycetes;c__Planctomycetacia;o__Isosphaerales;f__Isosphaeraceae;g__;s__
Otu000474	14	13	23	k__Bacteria;p__Acidobacteria;c__Subgroup_6
Otu000475	2	3	36	k__Bacteria;p__Firmicutes;c__Clostridia;o__Clostridiales;f__Family_XIII;g__Eubacterium_brachy_group;s__
Otu000477	7	18	24	k__Bacteria;p__Planctomycetes;c__Planctomycetacia;o__Pirellulales;f__Pirellulaceae;g__Pirellula;s__bacterium_enrichment_culture_clone_B432011
Otu000478	20	15	18	k__Bacteria;p__Nitrospirae;c__Thermodesulfovibrionia;o__;f__;g__;s__
Otu000479	18	20	16	k__Bacteria;p__Planctomycetes;c__Planctomycetacia;o__Pirellulales;f__Pirellulaceae;g__Candidatus_Anammoximicrobium;s__
Otu000480	4	8	31	k__Bacteria;p__Bacteroidetes;c__Ignavibacteria;o__Kryptoniales;f__BSV26;g__;s__
Otu000482	3	1	36	k__Bacteria;p__Bacteroidetes;c__Bacteroidia;o__Bacteroidales;f__SB-5;g__;s__
Otu000485	28	11	15	k__Bacteria;p__Planctomycetes;c__Planctomycetacia;o__Pirellulales;f__Pirellulaceae
Otu000486	4	5	32	k__Bacteria;p__Acidobacteria;c__Thermoanaerobaculia;o__Thermoanaerobaculales;f__Thermoanaerobaculaceae;g__Thermoanaerobaculum;s__
Otu000487	4	6	31	k__Bacteria;p__Proteobacteria;c__Deltaproteobacteria;o__NB1-j;f__;g__;s__
Otu000488	13	15	21	k__Bacteria;p__Chloroflexi;c__Anaerolineae;o__1-20;f__;g__;s__
Otu000489	3	2	35	k__Bacteria;p__Chloroflexi;c__Anaerolineae;o__Anaerolineales;f__Anaerolineaceae
Otu000490	17	20	15	k__Bacteria;p__Planctomycetes;c__Planctomycetacia;o__Isosphaerales;f__Isosphaeraceae;g__;s__
Otu000491	9	9	27	k__Bacteria;p__Proteobacteria;c__Gammaproteobacteria;o__Betaproteobacteriales;f__Burkholderiaceae
Otu000492	4	7	31	k__Bacteria;p__Chloroflexi;c__Anaerolineae;o__Caldilineales;f__Caldilineaceae;g__;s__
Otu000493	19	10	20	k__Bacteria;p__Actinobacteria;c__Acidimicrobiia;o__Microtrichales;f__Ilumatobacteraceae
Otu000494	8	4	30	k__Bacteria;p__Chloroflexi;c__Anaerolineae;o__SJA-15;f__;g__;s__
Otu000495	2	3	34	k__Bacteria;p__Acidobacteria;c__Subgroup_17;o__;f__;g__;s__
Otu000496	22	16	14	k__Bacteria;p__Planctomycetes;c__Phycisphaerae;o__Tepidisphaerales;f__WD2101_soil_group;g__;s__
Otu000497	32	21	5	k__Bacteria;p__Planctomycetes;c__Planctomycetacia;o__Pirellulales;f__Pirellulaceae;g__;s__
Otu000499	14	17	18	k__Bacteria;p__Proteobacteria;c__Gammaproteobacteria;o__KI89A_clade;f__;g__;s__
Otu000500	1	3	34	k__Bacteria
Otu000501	17	11	20	k__Bacteria;p__Proteobacteria;c__Gammaproteobacteria;o__Betaproteobacteriales;f__SC-I-84;g__;s__
Otu000502	9	17	21	k__Bacteria;p__Proteobacteria;c__Gammaproteobacteria;o__Betaproteobacteriales;f__SC-I-84;g__;s__
Otu000503	8	4	30	k__Bacteria;p__Proteobacteria;c__Deltaproteobacteria;o__NB1-j;f__;g__;s__
Otu000505	2	1	35	k__Bacteria;p__Planctomycetes;c__Planctomycetacia;o__Gemmatales;f__Gemmataceae;g__;s__
Otu000506	6	5	30	k__Bacteria;p__Proteobacteria;c__Deltaproteobacteria;o__Desulfarculales;f__Desulfarculaceae;g__;s__
Otu000509	1	1	35	k__Bacteria;p__Firmicutes;c__Clostridia;o__Clostridiales;f__Ruminococcaceae;g__Sporobacter;s__
Otu000510	4	3	32	k__Bacteria;p__Proteobacteria;c__Gammaproteobacteria;o__Betaproteobacteriales;f__SC-I-84;g__;s__
Otu000511	9	5	28	k__Bacteria;p__Proteobacteria;c__Deltaproteobacteria;o__Desulfarculales;f__Desulfarculaceae;g__;s__
Otu000512	15	12	20	k__Bacteria;p__Actinobacteria;c__Actinobacteria;o__Frankiales;f__Cryptosporangiaceae;g__Fodinicola;s__
Otu000514	35	15	6	k__Bacteria;p__Bacteroidetes;c__Bacteroidia;o__Cytophagales;f__Microscillaceae;g__;s__
Otu000515	1	1	35	k__Bacteria;p__Acidobacteria;c__Subgroup_25;o__;f__;g__;s__
Otu000516	4	13	25	k__Bacteria;p__Proteobacteria;c__Alphaproteobacteria;o__Rhodobacterales;f__Rhodobacteraceae;g__Rubellimicrobium;s__
Otu000517	9	13	23	k__Bacteria;p__Chloroflexi;c__Anaerolineae;o__Caldilineales;f__Caldilineaceae;g__;s__
Otu000518	1	6	31	k__Bacteria;p__Proteobacteria;c__Deltaproteobacteria;o__NB1-j;f__;g__;s__
Otu000519	17	7	21	k__Bacteria;p__Planctomycetes;c__Planctomycetacia;o__Pirellulales;f__Pirellulaceae;g__;s__
Otu000520	7	10	25	k__Bacteria;p__Proteobacteria;c__Alphaproteobacteria;o__Rhodospirillales;f__Rhodopirillaceae;g__Defluviicoccus;s__
Otu000521	4	4	30	k__Bacteria;p__Proteobacteria;c__Deltaproteobacteria;o__NB1-j;f__;g__;s__
Otu000522	15	16	17	k__Bacteria;p__Proteobacteria;c__Gammaproteobacteria;o__Betaproteobacteriales;f__Burkholderiaceae;g__;s__
Otu000523	1	3	33	k__Bacteria;p__Acidobacteria;c__Subgroup_6;o__;f__;g__;s__
Otu000524	12	12	20	k__Bacteria;p__Rokubacteria;c__NC10;o__Methylomirabilales;f__Methylomirabilaceae;g__Sh765B-TzT-35;s__
Otu000525	10	37	7	k__Bacteria;p__Proteobacteria;c__Gammaproteobacteria;o__Enterobacteriales;f__Enterobacteriaceae
Otu000526	49	6	2	k__Bacteria;p__Verrucomicrobia;c__Verrucomicrobiae;o__Verrucomicrobiales;f__Akkermansiaceae;g__Akkermansia;s__
Otu000527	4	1	32	k__Bacteria;p__Chloroflexi;c__Anaerolineae;o__;f__;g__;s__
Otu000530	4	2	31	k__Bacteria;p__Proteobacteria;c__Gammaproteobacteria;o__Acidiferrobacterales;f__Acidiferrobacteraceae;g__Sulfurifustis;s__
Otu000531	17	13	16	k__Bacteria;p__Actinobacteria;c__Thermoleophilia;o__Solirubrobacterales;f__67-14;g__;s__
Otu000532	14	12	19	k__Bacteria;p__Planctomycetes;c__Planctomycetacia;o__Planctomycetales;f__Rubinisphaeraceae;g__SH-PL14
Otu000533	9	20	17	k__Bacteria;p__Bacteroidetes;c__Bacteroidia;o__Flavobacteriales;f__Flavobacteriaceae;g__Flavobacterium;s__Flavobacterium_saliperosum_S13
Otu000536	12	24	12	k__Bacteria;p__Bacteroidetes;c__Bacteroidia;o__Bacteroidales;f__Marinilabiliaceae;g__Cytophaga_xylanolytica_group;s__
Otu000537	2	3	31	k__Bacteria;p__Planctomycetes;c__Planctomycetacia;o__Pirellulales;f__Pirellulaceae;g__Pirellula;s__
Otu000538	13	12	19	k__Bacteria;p__Actinobacteria;c__Actinobacteria;o__Propionibacteriales;f__Nocardioidaceae
Otu000539	14	13	18	k__Bacteria;p__Proteobacteria;c__Gammaproteobacteria;o__Betaproteobacteriales;f__Burkholderiaceae
Otu000540	1	1	32	k__Bacteria;p__Proteobacteria;c__Alphaproteobacteria;o__Rhizobiales;f__A0839;g__;s__
Otu000542	11	10	21	k__Bacteria;p__Verrucomicrobia;c__Verrucomicrobiae;o__Verrucomicrobiales;f__Verrucomicrobiaceae;g__;s__
Otu000543	8	5	26	k__Bacteria;p__Planctomycetes;c__Planctomycetacia;o__Isosphaerales;f__Isosphaeraceae;g__;s__
Otu000547	11	7	23	k__Bacteria;p__Proteobacteria;c__Gammaproteobacteria;o__Betaproteobacteriales;f__Burkholderiaceae
Otu000550	3	6	28	k__Bacteria;p__Proteobacteria;c__Deltaproteobacteria;o__Desulfuromonadales;f__Geobacteraceae;g__Geobacter;s__
Otu000551	10	8	23	k__Bacteria;p__Planctomycetes;c__Planctomycetacia;o__Pirellulales;f__Pirellulaceae;g__Pirellula;s__
Otu000552	3	3	29	k__Bacteria;p__Proteobacteria;c__Alphaproteobacteria;o__Rhizobiales;f__Xanthobacteraceae
Otu000554	4	38	8	k__Bacteria;p__Actinobacteria;c__Actinobacteria;o__Micrococcales;f__Microbacteriaceae;g__Aurantimicrobium;s__
Otu000555	12	6	23	k__Bacteria;p__Acidobacteria;c__Acidobacteriia;o__Solibacterales;f__Solibacteraceae_Subgroup_3;g__Paludibaculum;s__
Otu000556	5	4	27	k__Bacteria;p__Proteobacteria;c__Alphaproteobacteria;o__Rhodospirillales;f__Rhodopirillaceae;g__Defluviicoccus;s__
Otu000557	1	1	32	k__Bacteria;p__Rokubacteria;c__NC10;o__Methylomirabilales;f__Methylomirabilaceae;g__Sh765B-TzT-35;s__
Otu000558	2	5	29	k__Bacteria;p__Planctomycetes;c__Planctomycetacia;o__Planctomycetales;f__Rubinisphaeraceae;g__Planctomicrobium;s__
Otu000560	46	7	1	k__Bacteria;p__Cyanobacteria;c__Oxyphotobacteria;o__Chloroplast
Otu000561	2	2	31	k__Bacteria;p__Proteobacteria;c__Alphaproteobacteria;o__Sphingomonadales;f__Sphingomonadaceae;g__Sphingomonas
Otu000562	3	5	28	k__Bacteria;p__Proteobacteria;c__Gammaproteobacteria;o__Betaproteobacteriales;f__Nitrosomonadaceae;g__MND1;s__
Otu000563	20	20	8	k__Bacteria;p__Verrucomicrobia;c__Verrucomicrobiae;o__Pedosphaerales;f__Pedosphaeraceae;g__ADurbBin063-1;s__
Otu000564	21	10	14	k__Bacteria;p__Verrucomicrobia;c__Verrucomicrobiae;o__Pedosphaerales;f__Pedosphaeraceae;g__ADurbBin063-1;s__
Otu000565	10	4	24	k__Bacteria;p__Bacteroidetes;c__Bacteroidia;o__Bacteroidales;f__Bacteroidetes_vadinHA17;g__;s__
Otu000566	44	8	1	k__Bacteria;p__Cyanobacteria;c__Oxyphotobacteria;o__Chloroplast
Otu000567	1	6	28	k__Bacteria;p__Planctomycetes;c__Planctomycetacia;o__Gemmatales;f__Gemmataceae;g__Gemmata;s__
Otu000568	3	4	28	k__Bacteria;p__Acidobacteria;c__Subgroup_18;o__;f__;g__;s__
Otu000569	4	6	26	k__Bacteria;p__Bacteroidetes;c__Bacteroidia;o__Chitinophagales;f__Chitinophagaceae;g__Dinghuibacter;s__
Otu000570	4	6	27	k__Bacteria;p__Planctomycetes;c__Planctomycetacia;o__Gemmatales;f__Gemmataceae;g__;s__
Otu000571	29	10	9	k__Bacteria;p__Planctomycetes;c__Planctomycetacia;o__Pirellulales;f__Pirellulaceae;g__;s__
Otu000573	9	7	23	k__Bacteria;p__Proteobacteria;c__Gammaproteobacteria;o__Steroidobacterales;f__Steroidobacteraceae;g__;s__
Otu000575	1	5	29	k__Bacteria;p__Proteobacteria;c__Deltaproteobacteria;o__NB1-j;f__;g__;s__
Otu000576	1	1	31	k__Bacteria;p__Bacteroidetes;c__Bacteroidia;o__Sphingobacteriales;f__Lentimicrobiaceae
Otu000577	1	2	31	k__Bacteria;p__Planctomycetes;c__Planctomycetacia;o__Pirellulales;f__Pirellulaceae;g__;s__
Otu000578	11	6	22	k__Bacteria;p__Proteobacteria;c__Gammaproteobacteria
Otu000580	5	1	29	k__Bacteria;p__Proteobacteria;c__Alphaproteobacteria;o__Rhizobiales;f__Hyphomicrobiaceae;g__Pedomicrobium;s__
Otu000581	4	1	29	k__Bacteria;p__Proteobacteria;c__Deltaproteobacteria;o__Sva0485;f__;g__;s__
Otu000582	35	16	1	k__Bacteria;p__Fusobacteria;c__Fusobacteriia;o__Fusobacteriales;f__Fusobacteriaceae;g__Cetobacterium;s__
Otu000583	14	8	19	k__Bacteria;p__Acidobacteria;c__Subgroup_22;o__;f__;g__;s__
Otu000584	13	13	16	k__Bacteria;p__Proteobacteria;c__Gammaproteobacteria;o__Cellvibrionales;f__Halieaceae;g__OM60NOR5_clade;s__
Otu000586	35	2	9	k__Bacteria;p__Planctomycetes;c__Planctomycetacia;o__Gemmatales;f__Gemmataceae;g__Gemmata
Otu000587	4	9	24	k__Bacteria;p__Proteobacteria;c__Gammaproteobacteria;o__Betaproteobacteriales;f__Burkholderiaceae
Otu000588	17	13	13	k__Bacteria;p__Proteobacteria;c__Gammaproteobacteria;o__CCM19a;f__;g__;s__
Otu000589	8	3	25	k__Bacteria;p__Actinobacteria;c__Thermoleophilia;o__Gaiellales;f__;g__;s__
Otu000590	35	10	4	k__Bacteria;p__Planctomycetes;c__Planctomycetacia;o__Gemmatales;f__Gemmataceae;g__Fimbriiglobus;s__
Otu000591	10	11	18	k__Bacteria;p__Planctomycetes;c__Planctomycetacia;o__Isosphaerales;f__Isosphaeraceae;g__;s__
Otu000592	7	4	24	k__Bacteria;p__Planctomycetes;c__Planctomycetacia;o__Gemmatales;f__Gemmataceae;g__;s__
Otu000593	14	5	20	k__Bacteria;p__Acidobacteria;c__Acidobacteriia;o__Solibacterales;f__Solibacteraceae_Subgroup_3;g__Paludibaculum;s__
Otu000594	9	10	19	k__Bacteria;p__Chloroflexi;c__Anaerolineae;o__Caldilineales;f__Caldilineaceae;g__;s__
Otu000595	6	6	24	k__Bacteria;p__Proteobacteria;c__Deltaproteobacteria;o__NB1-j;f__;g__;s__
Otu000596	2	4	27	k__Bacteria;p__Acidobacteria;c__Subgroup_17;o__;f__;g__;s__
Otu000597	6	8	22	k__Bacteria;p__Actinobacteria;c__Thermoleophilia;o__Gaiellales;f__Gaiellaceae;g__Gaiella;s__
Otu000598	11	13	16	k__Bacteria;p__Proteobacteria;c__Gammaproteobacteria;o__Betaproteobacteriales;f__Burkholderiaceae;g__Lautropia;s__
Otu000600	3	4	26	k__Bacteria;p__Proteobacteria;c__Deltaproteobacteria;o__Desulfarculales;f__Desulfarculaceae;g__;s__
Otu000601	16	15	12	k__Bacteria;p__Verrucomicrobia;c__Verrucomicrobiae;o__Chthoniobacterales;f__Chthoniobacteraceae;g__Chthoniobacter;s__
Otu000602	10	17	14	k__Bacteria;p__Bacteroidetes;c__Bacteroidia;o__Bacteroidales;f__Prolixibacteraceae;g__;s__
Otu000603	1	23	16	k__Bacteria;p__Proteobacteria;c__Gammaproteobacteria;o__Betaproteobacteriales;f__Rhodocyclaceae;g__Azospira;s__
Otu000604	17	18	9	k__Bacteria;p__Proteobacteria;c__Alphaproteobacteria;o__Acetobacterales;f__Acetobacteraceae;g__Roseomonas
Otu000605	1	2	28	k__Bacteria;p__Acidobacteria;c__Acidobacteriia;o__Solibacterales;f__Solibacteraceae_Subgroup_3;g__GOUTB8;s__
Otu000606	1	6	26	k__Bacteria;p__Planctomycetes;c__Planctomycetacia;o__Planctomycetales;f__;g__;s__
Otu000607	31	10	6	k__Bacteria;p__Verrucomicrobia;c__Verrucomicrobiae;o__Pedosphaerales;f__Pedosphaeraceae;g__;s__
Otu000608	5	6	23	k__Bacteria;p__Bacteroidetes;c__Bacteroidia;o__Chitinophagales;f__Chitinophagaceae;g__;s__
Otu000609	4	9	22	k__Bacteria;p__Chloroflexi;c__Anaerolineae;o__Caldilineales;f__Caldilineaceae
Otu000610	17	8	15	k__Bacteria;p__Planctomycetes;c__Planctomycetacia;o__Gemmatales;f__Gemmataceae;g__;s__
Otu000611	3	5	25	k__Bacteria;p__Proteobacteria;c__Gammaproteobacteria;o__Betaproteobacteriales;f__SC-I-84;g__;s__
Otu000612	30	7	8	k__Bacteria;p__Planctomycetes;c__Planctomycetacia;o__Isosphaerales;f__Isosphaeraceae;g__;s__
Otu000614	4	6	24	k__Bacteria;p__Verrucomicrobia;c__Verrucomicrobiae;o__Verrucomicrobiales;f__Verrucomicrobiaceae
Otu000616	15	9	16	k__Bacteria;p__Planctomycetes;c__Planctomycetacia;o__Pirellulales;f__Pirellulaceae
Otu000617	3	1	28	k__Bacteria;p__Proteobacteria;c__Alphaproteobacteria;o__Sphingomonadales;f__Sphingomonadaceae;g__Sphingomonas
Otu000618	18	13	12	k__Bacteria;p__Chloroflexi;c__Anaerolineae;o__Caldilineales;f__Caldilineaceae;g__;s__
Otu000619	2	27	13	k__Bacteria;p__Bacteroidetes;c__Bacteroidia;o__Flavobacteriales;f__Flavobacteriaceae;g__Flavobacterium
Otu000621	4	4	25	k__Bacteria;p__Nitrospirae;c__Thermodesulfovibrionia;o__;f__;g__;s__
Otu000622	2	4	26	k__Bacteria;p__Proteobacteria;c__Deltaproteobacteria;o__Syntrophobacterales;f__Syntrophaceae;g__;s__
Otu000623	5	17	16	k__Bacteria;p__Bacteroidetes;c__Bacteroidia;o__Cytophagales;f__Cyclobacteriaceae;g__Algoriphagus;s__
Otu000624	7	19	14	k__Bacteria;p__Actinobacteria;c__Thermoleophilia;o__Solirubrobacterales;f__67-14;g__;s__
Otu000626	18	10	12	k__Bacteria;p__Verrucomicrobia;c__Verrucomicrobiae;o__Chthoniobacterales;f__Chthoniobacteraceae;g__Chthoniobacter;s__
Otu000627	2	2	27	k__Bacteria;p__Proteobacteria;c__Alphaproteobacteria;o__Sphingomonadales;f__Sphingomonadaceae
Otu000628	3	6	24	k__Bacteria;p__Proteobacteria;c__Alphaproteobacteria;o__Rhodospirillales;f__Rhodopirillaceae;g__Defluviicoccus;s__
Otu000629	5	8	21	k__Bacteria;p__Proteobacteria;c__Gammaproteobacteria
Otu000630	1	3	26	k__Bacteria;p__Proteobacteria;c__Deltaproteobacteria;o__NB1-j;f__;g__;s__
Otu000631	13	21	9	k__Bacteria;p__Planctomycetes;c__OM190;o__;f__;g__;s__
Otu000632	10	4	20	k__Bacteria;p__Planctomycetes;c__Planctomycetacia;o__Pirellulales;f__Pirellulaceae;g__Pirellula;s__
Otu000633	3	2	26	k__Bacteria;p__Acidobacteria;c__Acidobacteriia;o__Solibacterales;f__Solibacteraceae_Subgroup_3;g__Bryobacter;s__
Otu000634	24	12	7	k__Bacteria;p__Planctomycetes;c__Planctomycetacia;o__Pirellulales;f__Pirellulaceae
Otu000635	2	3	26	k__Bacteria;p__Proteobacteria;c__Deltaproteobacteria;o__Sva0485;f__;g__;s__
Otu000636	1	7	24	k__Bacteria;p__Planctomycetes;c__Planctomycetacia;o__Isosphaerales;f__Isosphaeraceae;g__;s__
Otu000637	21	13	8	k__Bacteria;p__Planctomycetes;c__Planctomycetacia;o__Pirellulales;f__Pirellulaceae;g__Candidatus_Anammoximicrobium;s__
Otu000638	5	29	8	k__Bacteria;p__Planctomycetes;c__Planctomycetacia;o__Planctomycetales;f__Schlesneriaceae;g__Planctopirus;s__
Otu000639	5	2	24	k__Bacteria;p__Nitrospirae;c__Thermodesulfovibrionia;o__;f__;g__;s__
Otu000640	1	3	26	k__Bacteria;p__Acidobacteria;c__Subgroup_17;o__;f__;g__;s__
Otu000641	1	1	27	k__Bacteria;p__Proteobacteria;c__Deltaproteobacteria;o__Sva0485;f__;g__;s__
Otu000642	2	1	26	k__Bacteria;p__Planctomycetes;c__Planctomycetacia;o__Gemmatales;f__Gemmataceae;g__Gemmata;s__
Otu000643	1	3	25	k__Bacteria;p__Chloroflexi;c__Anaerolineae;o__1-20;f__;g__;s__
Otu000644	1	3	26	k__Bacteria;p__Acidobacteria;c__Acidobacteriia;o__Solibacterales;f__Solibacteraceae_Subgroup_3;g__Candidatus_Solibacter;s__
Otu000645	4	23	11	k__Bacteria;p__Proteobacteria;c__Gammaproteobacteria;o__Xanthomonadales;f__Xanthomonadaceae;g__Arenimonas;s__
Otu000646	4	2	24	k__Bacteria;p__Proteobacteria;c__Gammaproteobacteria;o__Betaproteobacteriales;f__Nitrosomonadaceae;g__mle1-7;s__
Otu000647	6	4	22	k__Bacteria;p__Bacteroidetes;c__Ignavibacteria;o__OPB56;f__;g__;s__
Otu000648	13	10	14	k__Bacteria;p__Planctomycetes;c__Planctomycetacia;o__Pirellulales;f__Pirellulaceae;g__;s__
Otu000649	1	5	25	k__Bacteria;p__Acidobacteria;c__Subgroup_6;o__Unknown_Order;f__Unknown_Family;g__Luteitalea
Otu000650	1	1	27	k__Bacteria;p__Chloroflexi;c__Anaerolineae;o__Ardenticatenales;f__;g__;s__
Otu000651	7	11	17	k__Bacteria;p__Proteobacteria;c__Deltaproteobacteria;o__NB1-j;f__;g__;s__
Otu000652	1	4	24	k__Bacteria;p__Planctomycetes;c__Planctomycetacia;o__Gemmatales;f__Gemmataceae;g__;s__
Otu000653	1	2	26	k__Bacteria;p__Chloroflexi;c__Anaerolineae
Otu000654	1	1	27	k__Bacteria;p__Rokubacteria;c__NC10;o__Rokubacteriales;f__;g__;s__
Otu000655	10	7	18	k__Bacteria;p__Verrucomicrobia;c__Verrucomicrobiae;o__Verrucomicrobiales;f__Verrucomicrobiaceae;g__;s__
Otu000656	11	15	12	k__Bacteria;p__Planctomycetes;c__Phycisphaerae;o__Tepidisphaerales;f__WD2101_soil_group;g__;s__
Otu000659	6	4	21	k__Bacteria;p__Nitrospinae;c__P9X2b3D02;o__;f__;g__;s__
Otu000661	12	1	19	k__Bacteria;p__Planctomycetes;c__Planctomycetacia;o__Isosphaerales;f__Isosphaeraceae;g__;s__
Otu000662	6	2	22	k__Bacteria;p__Chloroflexi;c__Anaerolineae;o__Anaerolineales;f__Anaerolineaceae;g__;s__
Otu000663	1	3	25	k__Bacteria;p__Proteobacteria;c__Deltaproteobacteria;o__MBNT15;f__Actinobacteria_bacterium_RBG_13_63_9;g__;s__
Otu000665	3	3	23	k__Bacteria;p__Planctomycetes;c__Planctomycetacia;o__Pirellulales;f__Pirellulaceae;g__;s__
Otu000666	19	13	7	k__Bacteria;p__Verrucomicrobia;c__Verrucomicrobiae;o__Pedosphaerales;f__Pedosphaeraceae;g__;s__
Otu000671	4	13	16	k__Bacteria;p__Proteobacteria;c__Deltaproteobacteria;o__Desulfuromonadales;f__Geobacteraceae;g__Geobacter;s__
Otu000672	10	7	17	k__Bacteria;p__Planctomycetes;c__Phycisphaerae;o__Tepidisphaerales;f__WD2101_soil_group;g__;s__
Otu000674	7	14	14	k__Bacteria;p__Verrucomicrobia;c__Verrucomicrobiae;o__Verrucomicrobiales;f__Rubritaleaceae;g__Luteolibacter;s__
Otu000676	13	4	16	k__Bacteria;p__Planctomycetes;c__Phycisphaerae;o__Tepidisphaerales;f__WD2101_soil_group;g__;s__
Otu000680	2	3	23	k__Bacteria;p__Planctomycetes;c__Planctomycetacia;o__Pirellulales;f__Pirellulaceae;g__Pirellula;s__
Otu000681	7	6	18	k__Bacteria;p__Proteobacteria;c__Gammaproteobacteria;o__Steroidobacterales;f__Steroidobacteraceae;g__;s__
Otu000683	3	2	23	k__Bacteria;p__Proteobacteria;c__Deltaproteobacteria;o__Deltaproteobacteria_Incertae_Sedis;f__Syntrophorhabdaceae;g__Syntrophorhabdus;s__
Otu000684	8	2	20	k__Bacteria;p__Planctomycetes;c__Planctomycetacia;o__Isosphaerales;f__Isosphaeraceae;g__;s__
Otu000685	7	3	20	k__Bacteria;p__Proteobacteria;c__Gammaproteobacteria;o__Betaproteobacteriales;f__Nitrosomonadaceae;g__966-1;s__
Otu000686	12	17	8	k__Bacteria;p__Planctomycetes;c__Planctomycetacia;o__Pirellulales;f__Pirellulaceae;g__Pirellula
Otu000687	5	3	21	k__Bacteria;p__Bacteroidetes;c__Bacteroidia;o__Chitinophagales;f__Saprospiraceae;g__;s__
Otu000689	10	5	17	k__Bacteria;p__Actinobacteria;c__Actinobacteria;o__Micrococcales;f__Intrasporangiaceae
Otu000691	5	14	14	k__Bacteria;p__Proteobacteria;c__Gammaproteobacteria;o__Betaproteobacteriales;f__Burkholderiaceae
Otu000692	4	8	18	k__Bacteria;p__Planctomycetes;c__Planctomycetacia;o__Gemmatales;f__Gemmataceae;g__;s__
Otu000693	2	3	23	k__Bacteria;p__Proteobacteria;c__Deltaproteobacteria;o__Desulfuromonadales;f__Geobacteraceae;g__Geothermobacter;s__
Otu000694	5	6	19	k__Bacteria;p__Proteobacteria;c__Gammaproteobacteria;o__Betaproteobacteriales
Otu000695	11	8	14	k__Bacteria;p__Proteobacteria;c__Alphaproteobacteria;o__Rhizobiales;f__Methyloligellaceae
Otu000696	1	1	24	k__Bacteria;p__Acidobacteria;c__Subgroup_17;o__;f__;g__;s__
Otu000697	5	4	20	k__Bacteria;p__Acidobacteria;c__Subgroup_17;o__Acidobacteria_bacterium_RBG_16_70_10;f__;g__;s__
Otu000698	4	1	22	k__Bacteria;p__Bacteroidetes;c__Bacteroidia;o__Bacteroidales;f__Bacteroidetes_vadinHA17;g__;s__
Otu000699	15	10	10	k__Bacteria;p__Proteobacteria;c__Gammaproteobacteria;o__Betaproteobacteriales;f__Nitrosomonadaceae;g__Ellin6067;s__
Otu000701	8	4	18	k__Bacteria;p__Bacteroidetes;c__Ignavibacteria;o__Kryptoniales;f__BSV26;g__;s__
Otu000702	1	2	23	k__Bacteria;p__Verrucomicrobia;c__Verrucomicrobiae;o__Verrucomicrobiales;f__Rubritaleaceae;g__Luteolibacter
Otu000703	12	8	13	k__Bacteria;p__Proteobacteria;c__Alphaproteobacteria;o__Rhizobiales;f__Xanthobacteraceae
Otu000705	1	2	23	k__Bacteria;p__Planctomycetes;c__Planctomycetacia;o__Gemmatales;f__Gemmataceae;g__Gemmata;s__
Otu000707	2	20	11	k__Bacteria;p__Proteobacteria;c__Alphaproteobacteria;o__Sphingomonadales;f__Sphingomonadaceae
Otu000708	12	9	12	k__Bacteria;p__Verrucomicrobia;c__Verrucomicrobiae;o__Chthoniobacterales;f__Chthoniobacteraceae;g__Chthoniobacter
Otu000710	1	1	23	k__Bacteria;p__Gemmatimonadetes;c__Gemmatimonadetes;o__Gemmatimonadales;f__Gemmatimonadaceae;g__;s__
Otu000711	3	5	20	k__Bacteria;p__Proteobacteria;c__Deltaproteobacteria;o__Desulfarculales;f__Desulfarculaceae;g__;s__
Otu000713	8	12	12	k__Bacteria;p__Planctomycetes;c__Planctomycetacia;o__Planctomycetales;f__Schlesneriaceae;g__Schlesneria;s__
Otu000715	2	4	21	k__Bacteria;p__Planctomycetes;c__Planctomycetacia;o__Gemmatales;f__Gemmataceae;g__;s__
Otu000717	1	2	23	k__Bacteria
Otu000718	1	1	23	k__Bacteria
Otu000719	3	7	19	k__Bacteria;p__Proteobacteria;c__Deltaproteobacteria;o__Desulfobacterales;f__Desulfobacteraceae;g__Sva0081_sediment_group;s__delta_proteobacterium_enrichment_culture_clone_AP-FeEnrich12
Otu000720	3	5	20	k__Bacteria;p__Proteobacteria;c__Deltaproteobacteria;o__NB1-j;f__;g__;s__
Otu000721	22	1	11	k__Archaea;p__Euryarchaeota;c__Thermoplasmata;o__Methanomassiliicoccales;f__Methanomassiliicoccaceae;g__;s__
Otu000722	10	11	12	k__Bacteria;p__Proteobacteria;c__Alphaproteobacteria;o__Acetobacterales;f__Acetobacteraceae
Otu000723	17	12	7	k__Bacteria;p__Planctomycetes;c__Planctomycetacia;o__Pirellulales;f__Pirellulaceae;g__Candidatus_Anammoximicrobium;s__
Otu000724	3	10	17	k__Bacteria;p__Planctomycetes;c__Phycisphaerae;o__Tepidisphaerales;f__WD2101_soil_group;g__;s__
Otu000725	3	3	21	k__Bacteria;p__Proteobacteria;c__Gammaproteobacteria;o__Xanthomonadales;f__Xanthomonadaceae
Otu000727	12	13	9	k__Bacteria;p__Cyanobacteria;c__Oxyphotobacteria;o__Chloroplast
Otu000729	15	14	7	k__Bacteria;p__Planctomycetes;c__Planctomycetacia;o__Pirellulales;f__Pirellulaceae
Otu000730	8	4	17	k__Bacteria;p__Planctomycetes;c__Planctomycetacia;o__Gemmatales;f__Gemmataceae;g__;s__
Otu000731	1	1	23	k__Bacteria;p__Acidobacteria;c__Subgroup_17;o__;f__;g__;s__
Otu000732	1	3	22	k__Bacteria;p__Proteobacteria;c__Deltaproteobacteria;o__NB1-j;f__;g__;s__
Otu000733	23	10	5	k__Bacteria;p__Planctomycetes;c__Phycisphaerae;o__Tepidisphaerales;f__Tepidisphaeraceae;g__Tepidisphaera
Otu000735	9	6	15	k__Bacteria;p__Proteobacteria;c__Gammaproteobacteria;o__Steroidobacterales;f__Steroidobacteraceae;g__;s__
Otu000736	7	5	17	k__Bacteria;p__Proteobacteria;c__Gammaproteobacteria;o__Competibacterales;f__Competibacteraceae;g__Candidatus_Competibacter;s__
Otu000738	10	16	8	k__Bacteria;p__Firmicutes;c__Clostridia;o__Clostridiales;f__Family_XIII;g__Anaerovorax;s__
Otu000740	9	6	15	k__Bacteria;p__Actinobacteria;c__Acidimicrobiia;o__IMCC26256;f__;g__;s__
Otu000741	7	8	15	k__Bacteria;p__Proteobacteria;c__Gammaproteobacteria;o__Betaproteobacteriales;f__Burkholderiaceae
Otu000742	5	3	19	k__Bacteria;p__Chloroflexi;c__Anaerolineae;o__SJA-15;f__;g__;s__
Otu000743	1	2	22	k__Bacteria;p__Acidobacteria;c__Subgroup_6;o__;f__;g__;s__
Otu000744	4	6	18	k__Bacteria;p__Planctomycetes;c__Planctomycetacia;o__Pirellulales;f__Pirellulaceae;g__;s__
Otu000745	1	1	23	k__Bacteria;p__Spirochaetes;c__Leptospirae;o__Leptospirales;f__Leptospiraceae;g__RBG-16-49-21;s__
Otu000746	7	6	16	k__Bacteria;p__Verrucomicrobia;c__Verrucomicrobiae;o__Pedosphaerales;f__Pedosphaeraceae;g__;s__
Otu000747	1	1	23	k__Bacteria;p__Proteobacteria;c__Alphaproteobacteria
Otu000748	14	12	8	k__Bacteria;p__Verrucomicrobia;c__Verrucomicrobiae;o__Pedosphaerales;f__Pedosphaeraceae;g__;s__
Otu000750	4	1	21	k__Bacteria;p__Planctomycetes;c__Planctomycetacia;o__Pirellulales;f__Pirellulaceae;g__;s__
Otu000751	2	1	21	k__Bacteria;p__Chloroflexi;c__Anaerolineae;o__Anaerolineales;f__Anaerolineaceae;g__;s__
Otu000752	7	13	11	k__Bacteria;p__Actinobacteria
Otu000753	3	2	21	k__Bacteria;p__Planctomycetes;c__Planctomycetacia;o__Gemmatales;f__Gemmataceae;g__;s__
Otu000754	13	10	10	k__Bacteria;p__Verrucomicrobia;c__Verrucomicrobiae;o__Pedosphaerales;f__Pedosphaeraceae;g__ADurbBin063-1;s__
Otu000755	19	4	9	k__Bacteria;p__Planctomycetes;c__Planctomycetacia;o__Pirellulales;f__Pirellulaceae;g__Pirellula;s__
Otu000756	2	2	21	k__Bacteria;p__Planctomycetes;c__Planctomycetacia;o__Gemmatales;f__Gemmataceae
Otu000757	6	14	12	k__Bacteria;p__Planctomycetes;c__Planctomycetacia;o__Gemmatales;f__Gemmataceae;g__Gemmata;s__
Otu000758	9	3	16	k__Bacteria;p__Proteobacteria;c__Alphaproteobacteria;o__Acetobacterales;f__Acetobacteraceae
Otu000759	2	3	20	k__Bacteria;p__Acidobacteria;c__Blastocatellia_Subgroup_4;o__Blastocatellales;f__Blastocatellaceae;g__JGI_0001001-H03;s__
Otu000763	2	5	19	k__Bacteria;p__Bacteroidetes;c__Bacteroidia;o__Chitinophagales;f__Chitinophagaceae
Otu000764	3	3	19	k__Bacteria;p__Proteobacteria;c__Deltaproteobacteria;o__MBNT15;f__Deltaproteobacteria_bacterium_CSP1-8;g__;s__
Otu000765	1	1	22	k__Bacteria;p__Gemmatimonadetes;c__Gemmatimonadetes;o__Gemmatimonadales;f__Gemmatimonadaceae;g__;s__
Otu000766	2	2	20	k__Bacteria;p__Planctomycetes;c__Planctomycetacia;o__Pirellulales;f__Pirellulaceae;g__Pirellula;s__
Otu000769	2	3	20	k__Bacteria;p__Proteobacteria;c__Deltaproteobacteria;o__MBNT15
Otu000770	1	5	19	k__Bacteria;p__Nitrospinae;c__P9X2b3D02;o__;f__;g__;s__
Otu000771	10	1	17	k__Bacteria;p__Planctomycetes;c__Phycisphaerae;o__Tepidisphaerales;f__WD2101_soil_group;g__;s__
Otu000774	1	1	21	k__Bacteria;p__Proteobacteria;c__Deltaproteobacteria;o__RCP2-54;f__;g__;s__
Otu000776	4	10	14	k__Bacteria;p__Acidobacteria;c__Subgroup_6;o__;f__;g__;s__
Otu000777	5	3	18	k__Bacteria;p__Planctomycetes;c__Planctomycetacia;o__Planctomycetales;f__Gimesiaceae;g__;s__
Otu000779	5	2	18	k__Bacteria;p__Proteobacteria;c__Alphaproteobacteria
Otu000781	1	3	20	k__Bacteria;p__Acidobacteria;c__Acidobacteriia;o__Subgroup_2;f__;g__;s__
Otu000782	6	5	16	k__Bacteria;p__Proteobacteria;c__Gammaproteobacteria;o__Betaproteobacteriales;f__TRA3-20;g__;s__
Otu000783	8	6	14	k__Bacteria;p__Actinobacteria;c__Actinobacteria
Otu000784	1	3	20	k__Bacteria;p__Acidobacteria;c__Aminicenantia;o__Aminicenantales;f__;g__;s__
Otu000785	1	1	21	k__Bacteria;p__Acidobacteria;c__Subgroup_25;o__;f__;g__;s__
Otu000786	2	11	14	k__Bacteria;p__Proteobacteria;c__Deltaproteobacteria;o__Myxococcales;f__Archangiaceae;g__Anaeromyxobacter;s__
Otu000788	1	13	14	k__Bacteria;p__Actinobacteria;c__Actinobacteria;o__Frankiales;f__Cryptosporangiaceae;g__Fodinicola;s__
Otu000789	10	3	14	k__Bacteria;p__Planctomycetes;c__Pla4_lineage;o__;f__;g__;s__
Otu000790	3	3	18	k__Bacteria;p__Verrucomicrobia;c__Verrucomicrobiae;o__Pedosphaerales;f__Pedosphaeraceae
Otu000791	2	3	19	k__Bacteria;p__Acidobacteria;c__Subgroup_22;o__;f__;g__;s__
Otu000792	6	3	17	k__Bacteria;p__Actinobacteria;c__Actinobacteria
Otu000794	1	1	21	k__Bacteria;p__Verrucomicrobia;c__Verrucomicrobiae;o__Pedosphaerales;f__Pedosphaeraceae;g__;s__
Otu000796	1	1	21	k__Bacteria;p__Bacteroidetes;c__Rhodothermia;o__Rhodothermales;f__Rhodothermaceae;g__;s__
Otu000801	12	12	7	k__Bacteria;p__Chloroflexi;c__Anaerolineae;o__1-20;f__;g__;s__
Otu000802	1	1	20	k__Bacteria;p__Acidobacteria;c__Aminicenantia;o__Aminicenantales;f__;g__;s__
Otu000803	13	5	11	k__Bacteria;p__Planctomycetes;c__Planctomycetacia;o__Gemmatales;f__Gemmataceae;g__;s__
Otu000804	9	5	13	k__Bacteria;p__Verrucomicrobia;c__Verrucomicrobiae;o__Pedosphaerales;f__Pedosphaeraceae;g__ADurbBin063-1;s__
Otu000805	3	12	13	k__Bacteria;p__Bacteroidetes;c__Bacteroidia;o__Flavobacteriales;f__NS9_marine_group
Otu000806	3	1	19	k__Bacteria;p__Proteobacteria;c__Gammaproteobacteria;o__Betaproteobacteriales;f__Nitrosomonadaceae;g__mle1-7;s__
Otu000807	6	6	14	k__Bacteria;p__Proteobacteria;c__Gammaproteobacteria;o__HOC36;f__;g__;s__
Otu000808	2	1	20	k__Bacteria;p__Planctomycetes;c__Planctomycetacia;o__Gemmatales;f__Gemmataceae;g__;s__
Otu000809	10	14	7	k__Bacteria;p__Verrucomicrobia;c__Verrucomicrobiae;o__Pedosphaerales;f__Pedosphaeraceae;g__;s__
Otu000810	11	12	7	k__Bacteria;p__Planctomycetes;c__Planctomycetacia;o__Pirellulales;f__Pirellulaceae;g__;s__
Otu000812	2	2	19	k__Bacteria;p__Verrucomicrobia;c__Verrucomicrobiae;o__Verrucomicrobiales;f__Rubritaleaceae;g__;s__
Otu000814	14	10	7	k__Bacteria;p__Proteobacteria;c__Alphaproteobacteria;o__Acetobacterales;f__Acetobacteraceae
Otu000816	1	2	19	k__Bacteria;p__Nitrospirae;c__Thermodesulfovibrionia;o__;f__;g__;s__
Otu000818	15	5	9	k__Bacteria;p__Actinobacteria;c__Acidimicrobiia;o__Microtrichales;f__Ilumatobacteraceae;g__;s__
Otu000819	3	13	11	k__Bacteria;p__Proteobacteria;c__Alphaproteobacteria
Otu000820	10	8	11	k__Bacteria;p__Chloroflexi;c__Anaerolineae;o__Caldilineales;f__Caldilineaceae;g__;s__
Otu000824	1	2	19	k__Bacteria;p__Latescibacteria;c__Latescibacteria;o__Latescibacterales;f__Latescibacteraceae;g__;s__
Otu000825	2	4	17	k__Bacteria;p__Proteobacteria;c__Deltaproteobacteria;o__Desulfarculales;f__Desulfarculaceae;g__;s__
Otu000826	1	12	13	k__Bacteria;p__Cyanobacteria;c__Oxyphotobacteria;o__Nostocales;f__Microcystaceae
Otu000827	2	11	13	k__Bacteria;p__Proteobacteria;c__Gammaproteobacteria;o__Betaproteobacteriales;f__Rhodocyclaceae;g__Propionivibrio;s__
Otu000830	14	10	6	k__Bacteria;p__Verrucomicrobia;c__Verrucomicrobiae;o__Verrucomicrobiales;f__Rubritaleaceae;g__Luteolibacter;s__
Otu000831	7	5	14	k__Bacteria;p__Proteobacteria;c__Alphaproteobacteria;o__Acetobacterales;f__Acetobacteraceae
Otu000832	7	9	11	k__Bacteria;p__Verrucomicrobia;c__Verrucomicrobiae;o__Verrucomicrobiales;f__Rubritaleaceae;g__;s__
Otu000834	9	2	14	k__Bacteria;p__Planctomycetes;c__Planctomycetacia;o__Gemmatales;f__Gemmataceae;g__Gemmata;s__
Otu000835	10	21	2	k__Bacteria;p__Bacteroidetes;c__Bacteroidia;o__Bacteroidales;f__Bacteroidaceae;g__Bacteroides
Otu000836	7	4	14	k__Bacteria;p__Proteobacteria;c__Deltaproteobacteria;o__Deltaproteobacteria_Incertae_Sedis;f__Syntrophorhabdaceae;g__Syntrophorhabdus;s__
Otu000838	1	1	19	k__Bacteria;p__Proteobacteria;c__Deltaproteobacteria
Otu000839	4	3	16	k__Bacteria;p__Acidobacteria;c__Subgroup_6;o__;f__;g__;s__
Otu000841	7	7	11	k__Bacteria;p__Planctomycetes;c__Planctomycetacia;o__Isosphaerales;f__Isosphaeraceae;g__;s__
Otu000842	4	3	16	k__Bacteria;p__Proteobacteria;c__Alphaproteobacteria;o__Rhodobacterales;f__Rhodobacteraceae;g__Rhodobacter
Otu000845	3	3	16	k__Bacteria;p__Nitrospirae;c__4-29-1;o__;f__;g__;s__
Otu000848	5	7	13	k__Bacteria;p__Actinobacteria;c__Thermoleophilia;o__Gaiellales;f__;g__;s__
Otu000849	1	1	19	k__Bacteria;p__Proteobacteria;c__Deltaproteobacteria;o__Myxococcales;f__BIrii41;g__;s__
Otu000852	5	4	14	k__Bacteria;p__Acidobacteria;c__Subgroup_6;o__;f__;g__;s__
Otu000854	12	4	10	k__Bacteria;p__Planctomycetes;c__Planctomycetacia;o__Gemmatales;f__Gemmataceae;g__;s__
Otu000855	11	11	7	k__Bacteria;p__Chloroflexi;c__KD4-96;o__;f__;g__;s__
Otu000856	3	4	16	k__Bacteria;p__Planctomycetes;c__Planctomycetacia;o__Planctomycetales;f__;g__;s__
Otu000858	4	2	16	k__Bacteria;p__Proteobacteria;c__Gammaproteobacteria;o__Betaproteobacteriales;f__Rhodocyclaceae
Otu000859	1	2	18	k__Bacteria;p__Proteobacteria;c__Gammaproteobacteria;o__Betaproteobacteriales
Otu000861	22	8	1	k__Bacteria;p__Planctomycetes;c__Planctomycetacia;o__Isosphaerales;f__Isosphaeraceae;g__;s__
Otu000863	3	13	10	k__Bacteria;p__Proteobacteria;c__Gammaproteobacteria;o__Betaproteobacteriales;f__Burkholderiaceae
Otu000864	8	7	11	k__Bacteria;p__Acidobacteria;c__Subgroup_17;o__;f__;g__;s__
Otu000866	5	7	12	k__Bacteria;p__Proteobacteria;c__Gammaproteobacteria;o__Cellvibrionales;f__Spongiibacteraceae;g__BD1-7_clade;s__
Otu000868	5	15	8	k__Bacteria;p__Chloroflexi;c__Anaerolineae;o__Caldilineales;f__Caldilineaceae
Otu000869	4	1	16	k__Bacteria;p__Acidobacteria;c__c5LKS83;o__;f__;g__;s__
Otu000870	4	10	11	k__Bacteria;p__Planctomycetes;c__Phycisphaerae;o__Tepidisphaerales;f__WD2101_soil_group
Otu000871	9	4	11	k__Bacteria;p__Actinobacteria;c__Acidimicrobiia;o__Microtrichales;f__Ilumatobacteraceae;g__CL500-29_marine_group
Otu000872	2	3	16	k__Bacteria;p__Chloroflexi;c__KD4-96;o__;f__;g__;s__
Otu000873	6	9	10	k__Bacteria;p__Actinobacteria;c__Actinobacteria
Otu000874	1	7	14	k__Bacteria;p__Planctomycetes;c__Phycisphaerae;o__Tepidisphaerales;f__WD2101_soil_group;g__;s__
Otu000875	8	10	8	k__Bacteria;p__Proteobacteria;c__Gammaproteobacteria;o__Methylococcales;f__Methylococcaceae;g__Methylocaldum;s__
Otu000879	12	3	10	k__Bacteria;p__Proteobacteria;c__Gammaproteobacteria;o__Betaproteobacteriales;f__Nitrosomonadaceae;g__oc32;s__
Otu000880	7	3	13	k__Bacteria;p__Planctomycetes;c__Planctomycetacia;o__Gemmatales;f__Gemmataceae;g__;s__
Otu000881	4	18	6	k__Bacteria;p__Proteobacteria;c__Gammaproteobacteria;o__Enterobacteriales;f__Enterobacteriaceae;g__Escherichia-Shigella
Otu000882	11	2	11	k__Bacteria;p__Proteobacteria;c__Deltaproteobacteria;o__Myxococcales;f__Archangiaceae;g__Anaeromyxobacter;s__
Otu000883	9	16	4	k__Bacteria;p__Verrucomicrobia;c__Verrucomicrobiae;o__Pedosphaerales;f__Pedosphaeraceae;g__;s__
Otu000884	1	2	17	k__Bacteria;p__Nitrospinae;c__P9X2b3D02;o__;f__;g__;s__
Otu000885	4	3	15	k__Bacteria;p__Firmicutes;c__Bacilli;o__Bacillales;f__Bacillaceae;g__Bacillus;s__Bacillus_niacini
Otu000886	2	2	16	k__Bacteria;p__Proteobacteria;c__Deltaproteobacteria;o__Desulfuromonadales;f__Geobacteraceae;g__Geobacter
Otu000887	6	17	5	k__Bacteria;p__Proteobacteria;c__Gammaproteobacteria;o__Betaproteobacteriales;f__Burkholderiaceae
Otu000889	2	5	15	k__Bacteria;p__Proteobacteria;c__Deltaproteobacteria;o__Syntrophobacterales;f__Syntrophaceae;g__;s__
Otu000890	3	3	15	k__Bacteria;p__Proteobacteria;c__Gammaproteobacteria;o__Betaproteobacteriales;f__Nitrosomonadaceae;g__Ellin6067;s__
Otu000891	2	4	15	k__Bacteria;p__Acidobacteria;c__Acidobacteriia;o__Solibacterales;f__Solibacteraceae_Subgroup_3;g__Paludibaculum;s__
Otu000892	2	2	16	k__Bacteria;p__Proteobacteria;c__Alphaproteobacteria;o__Rhizobiales;f__Xanthobacteraceae;g__;s__
Otu000894	2	4	15	k__Bacteria;p__Chloroflexi;c__Anaerolineae;o__SJA-15;f__;g__;s__
Otu000895	5	1	15	k__Bacteria;p__Planctomycetes;c__Planctomycetacia;o__Pirellulales;f__Pirellulaceae;g__Pir4_lineage;s__
Otu000897	7	5	11	k__Bacteria;p__Acidobacteria;c__Subgroup_6;o__;f__;g__;s__
Otu000898	2	3	16	k__Bacteria;p__Planctomycetes;c__Planctomycetacia;o__Gemmatales;f__Gemmataceae;g__;s__
Otu000900	2	1	17	k__Bacteria;p__Proteobacteria;c__Gammaproteobacteria;o__Betaproteobacteriales;f__Burkholderiaceae;g__;s__
Otu000901	5	1	15	k__Bacteria;p__Acidobacteria;c__Thermoanaerobaculia;o__Thermoanaerobaculales;f__Thermoanaerobaculaceae;g__Subgroup_10
Otu000902	13	3	9	k__Bacteria;p__Planctomycetes;c__Planctomycetacia;o__Pirellulales;f__Pirellulaceae;g__Pir3_lineage;s__
Otu000903	1	1	17	k__Bacteria;p__Proteobacteria;c__Alphaproteobacteria;o__Caulobacterales;f__Hyphomonadaceae;g__Hirschia;s__
Otu000906	1	8	13	k__Bacteria;p__Proteobacteria;c__Gammaproteobacteria;o__Pseudomonadales;f__Pseudomonadaceae;g__Pseudomonas
Otu000907	3	1	16	k__Bacteria;p__Proteobacteria;c__Gammaproteobacteria;o__Betaproteobacteriales;f__Nitrosomonadaceae;g__Ellin6067;s__
Otu000909	1	1	17	k__Bacteria;p__Bacteroidetes;c__Bacteroidia;o__Bacteroidales;f__Rikenellaceae;g__Acetobacteroides;s__
Otu000912	3	6	13	k__Bacteria;p__Verrucomicrobia;c__Verrucomicrobiae;o__Chthoniobacterales;f__Chthoniobacteraceae;g__Chthoniobacter
Otu000913	10	8	7	k__Bacteria;p__Planctomycetes;c__Planctomycetacia;o__Pirellulales;f__Pirellulaceae;g__;s__
Otu000914	9	6	9	k__Bacteria;p__Actinobacteria;c__Actinobacteria;o__Corynebacteriales;f__Mycobacteriaceae;g__Mycobacterium
Otu000915	2	2	15	k__Bacteria;p__Proteobacteria;c__Deltaproteobacteria;o__Deltaproteobacteria_Incertae_Sedis;f__Syntrophorhabdaceae;g__Syntrophorhabdus;s__
Otu000918	16	5	6	k__Bacteria;p__Planctomycetes;c__Planctomycetacia;o__Pirellulales;f__Pirellulaceae
Otu000919	6	3	13	k__Bacteria;p__Actinobacteria;c__Acidimicrobiia;o__Microtrichales;f__Ilumatobacteraceae
Otu000921	4	3	14	k__Bacteria;p__Actinobacteria;c__Thermoleophilia;o__Gaiellales;f__Gaiellaceae;g__Gaiella;s__
Otu000923	3	7	12	k__Bacteria;p__Bacteroidetes;c__Bacteroidia;o__Bacteroidales;f__Bacteroidetes_vadinHA17;g__;s__
Otu000924	5	11	9	k__Bacteria;p__Planctomycetes;c__Pla4_lineage;o__;f__;g__;s__
Otu000925	7	3	12	k__Bacteria;p__Proteobacteria;c__Alphaproteobacteria;o__Rhodospirillales;f__Rhodopirillaceae;g__Defluviicoccus;s__
Otu000928	2	2	15	k__Bacteria;p__Proteobacteria;c__Deltaproteobacteria
Otu000929	2	15	8	k__Bacteria;p__Planctomycetes;c__OM190;o__;f__;g__;s__
Otu000932	7	17	3	k__Bacteria;p__Proteobacteria;c__Alphaproteobacteria;o__Rhizobiales;f__Rhizobiales_Incertae_Sedis;g__Alsobacter;s__
Otu000933	4	5	12	k__Bacteria;p__Chloroflexi;c__Anaerolineae;o__SJA-15;f__;g__;s__
Otu000934	16	5	5	k__Bacteria;p__Planctomycetes;c__Planctomycetacia;o__Isosphaerales;f__Isosphaeraceae;g__;s__
Otu000937	3	8	11	k__Bacteria;p__Planctomycetes;c__Planctomycetacia;o__Pirellulales;f__Pirellulaceae;g__;s__
Otu000938	4	3	13	k__Bacteria;p__Proteobacteria;c__Deltaproteobacteria;o__Myxococcales;f__Haliangiaceae;g__Haliangium;s__
Otu000939	2	2	15	k__Bacteria;p__Bacteroidetes;c__Ignavibacteria;o__Ignavibacteriales;f__PHOS-HE36;g__;s__
Otu000940	6	8	9	k__Bacteria;p__Actinobacteria;c__Thermoleophilia;o__Gaiellales;f__;g__;s__
Otu000941	1	7	12	k__Bacteria;p__Planctomycetes;c__Planctomycetacia;o__Planctomycetales;f__;g__;s__
Otu000942	1	3	15	k__Bacteria;p__Proteobacteria;c__Gammaproteobacteria;o__Betaproteobacteriales;f__Nitrosomonadaceae;g__mle1-7;s__
Otu000943	16	7	4	k__Bacteria;p__Planctomycetes;c__Planctomycetacia;o__Pirellulales;f__Pirellulaceae;g__;s__
Otu000944	3	2	15	k__Bacteria;p__Proteobacteria;c__Deltaproteobacteria
Otu000945	2	1	15	k__Bacteria;p__Chloroflexi;c__Anaerolineae;o__Caldilineales;f__Caldilineaceae;g__;s__
Otu000946	1	1	16	k__Bacteria;p__Actinobacteria;c__Acidimicrobiia;o__Microtrichales;f__Ilumatobacteraceae
Otu000947	7	11	7	k__Bacteria;p__Planctomycetes;c__Planctomycetacia;o__Pirellulales;f__Pirellulaceae;g__Blastopirellula;s__bacterium_enrichment_culture_clone_B552011
Otu000949	6	8	9	k__Bacteria;p__Actinobacteria;c__Actinobacteria;o__Kineosporiales;f__Kineosporiaceae
Otu000950	1	8	12	k__Bacteria;p__Proteobacteria;c__Deltaproteobacteria;o__Desulfarculales;f__Desulfarculaceae;g__;s__
Otu000951	8	6	9	k__Bacteria;p__Firmicutes;c__Clostridia;o__Clostridiales;f__Clostridiaceae_1;g__Clostridium_sensu_stricto_1
Otu000952	4	3	13	k__Bacteria;p__Verrucomicrobia;c__Verrucomicrobiae;o__Pedosphaerales;f__Pedosphaeraceae;g__;s__
Otu000953	5	1	14	k__Bacteria;p__Planctomycetes;c__Planctomycetacia;o__Pirellulales;f__Pirellulaceae;g__Pirellula;s__
Otu000954	3	1	15	k__Bacteria;p__Proteobacteria;c__Alphaproteobacteria;o__;f__;g__;s__
Otu000955	2	12	8	k__Bacteria;p__Proteobacteria;c__Deltaproteobacteria;o__Desulfuromonadales;f__Geobacteraceae;g__Geobacter
Otu000956	23	4	1	k__Bacteria;p__Firmicutes;c__Clostridia;o__Clostridiales;f__Clostridiaceae_1;g__Clostridium_sensu_stricto_13
Otu000958	4	2	14	k__Bacteria;p__Rokubacteria;c__NC10;o__Rokubacteriales;f__;g__;s__
Otu000959	2	3	14	k__Bacteria;p__Proteobacteria;c__Deltaproteobacteria;o__Desulfarculales;f__Desulfarculaceae;g__;s__
Otu000960	3	3	13	k__Bacteria;p__Nitrospinae;c__P9X2b3D02;o__;f__;g__;s__
Otu000961	3	6	12	k__Bacteria;p__Verrucomicrobia;c__Verrucomicrobiae;o__Pedosphaerales;f__Pedosphaeraceae;g__;s__
Otu000962	6	3	12	k__Bacteria;p__Chloroflexi;c__Anaerolineae;o__1-20;f__;g__;s__
Otu000964	6	2	12	k__Bacteria;p__Proteobacteria;c__Deltaproteobacteria;o__Desulfuromonadales;f__Geobacteraceae;g__Geobacter
Otu000965	1	2	15	k__Bacteria;p__Actinobacteria;c__Acidimicrobiia;o__Microtrichales;f__;g__;s__
Otu000966	13	5	6	k__Bacteria;p__Planctomycetes;c__Planctomycetacia;o__Pirellulales;f__Pirellulaceae;g__Pirellula;s__
Otu000969	18	5	3	k__Bacteria;p__Planctomycetes;c__Planctomycetacia;o__Planctomycetales;f__Rubinisphaeraceae;g__Planctomicrobium;s__
Otu000970	5	2	13	k__Bacteria;p__Proteobacteria;c__Gammaproteobacteria;o__PLTA13;f__;g__;s__
Otu000971	1	2	15	k__Bacteria;p__Proteobacteria;c__Deltaproteobacteria;o__Desulfuromonadales;f__Geobacteraceae;g__Geothermobacter;s__denitrifying_bacterium_enrichment_culture_clone_NOA_1_A8
Otu000974	13	3	7	k__Bacteria;p__Planctomycetes;c__Phycisphaerae;o__mle1-8;f__;g__;s__
Otu000975	8	2	11	k__Bacteria;p__Nitrospirae;c__Thermodesulfovibrionia;o__;f__;g__;s__
Otu000976	5	2	13	k__Bacteria;p__Proteobacteria;c__Gammaproteobacteria;o__Betaproteobacteriales;f__Rhodocyclaceae
Otu000977	4	2	13	k__Bacteria;p__Planctomycetes;c__Planctomycetacia;o__Pirellulales;f__Pirellulaceae;g__;s__
Otu000979	10	6	8	k__Bacteria;p__Verrucomicrobia;c__Verrucomicrobiae;o__Pedosphaerales;f__Pedosphaeraceae;g__;s__
Otu000980	3	1	15	k__Bacteria;p__Proteobacteria;c__Gammaproteobacteria;o__Betaproteobacteriales;f__Nitrosomonadaceae;g__Ellin6067
Otu000981	6	8	9	k__Bacteria;p__Proteobacteria;c__Deltaproteobacteria;o__Sva0485;f__;g__;s__
Otu000982	6	7	9	k__Bacteria;p__Bacteroidetes;c__Bacteroidia;o__Bacteroidales;f__Bacteroidaceae;g__Bacteroides
Otu000984	16	11	1	k__Bacteria;p__Planctomycetes;c__Planctomycetacia;o__Isosphaerales;f__Isosphaeraceae;g__;s__
Otu000986	6	3	11	k__Bacteria;p__Proteobacteria;c__Deltaproteobacteria;o__Myxococcales;f__Archangiaceae;g__Anaeromyxobacter;s__
Otu000987	7	17	2	k__Bacteria;p__Verrucomicrobia;c__Verrucomicrobiae;o__Verrucomicrobiales;f__Rubritaleaceae;g__Luteolibacter;s__
Otu000988	16	1	6	k__Bacteria;p__Planctomycetes;c__Planctomycetacia;o__Pirellulales;f__Pirellulaceae;g__Pirellula;s__
Otu000989	8	8	7	k__Bacteria;p__Planctomycetes;c__Planctomycetacia;o__Pirellulales;f__Pirellulaceae
Otu000992	8	6	8	k__Bacteria;p__Planctomycetes;c__Planctomycetacia;o__Planctomycetales;f__;g__;s__
Otu000995	2	3	14	k__Bacteria;p__Planctomycetes;c__Planctomycetacia;o__Planctomycetales;f__;g__;s__
Otu000996	4	2	13	k__Bacteria;p__Proteobacteria;c__Deltaproteobacteria;o__MBNT15
Otu000997	12	3	8	k__Bacteria;p__Planctomycetes;c__Planctomycetacia;o__Gemmatales;f__Gemmataceae;g__;s__
Otu000998	1	1	16	k__Bacteria;p__Proteobacteria;c__Alphaproteobacteria;o__;f__;g__;s__
Otu000999	6	5	10	k__Bacteria;p__Verrucomicrobia;c__Verrucomicrobiae;o__Verrucomicrobiales;f__Rubritaleaceae
Otu001000	1	16	6	k__Bacteria;p__Bacteroidetes;c__Bacteroidia;o__Bacteroidales;f__Prolixibacteraceae;g__WCHB1-32;s__
Otu001002	2	4	13	k__Bacteria;p__Proteobacteria;c__Deltaproteobacteria;o__Myxococcales;f__bacteriap25;g__;s__
Otu001003	1	8	11	k__Bacteria;p__Verrucomicrobia;c__Verrucomicrobiae;o__S-BQ2-57_soil_group;f__;g__;s__
Otu001005	17	6	2	k__Bacteria;p__Planctomycetes;c__Planctomycetacia;o__Pirellulales;f__Pirellulaceae;g__Candidatus_Anammoximicrobium;s__
Otu001006	4	4	11	k__Bacteria;p__Acidobacteria;c__Subgroup_6;o__;f__;g__;s__
Otu001007	1	3	14	k__Bacteria;p__Proteobacteria;c__Deltaproteobacteria;o__Syntrophobacterales;f__Syntrophaceae;g__;s__
Otu001008	4	2	13	k__Bacteria;p__Acidobacteria;c__Acidobacteriia;o__Solibacterales;f__Solibacteraceae_Subgroup_3;g__Bryobacter;s__
Otu001009	4	1	13	k__Bacteria
Otu001010	18	2	4	k__Bacteria;p__Proteobacteria;c__Alphaproteobacteria;o__Rhodospirillales;f__Rhodopirillaceae;g__Defluviicoccus;s__
Otu001013	1	9	10	k__Bacteria;p__Firmicutes;c__Clostridia;o__Clostridiales;f__Clostridiaceae_1;g__Clostridium_sensu_stricto_8;s__
Otu001014	2	1	14	k__Bacteria;p__Bacteroidetes;c__Bacteroidia;o__Bacteroidales;f__Bacteroidetes_vadinHA17;g__;s__
Otu001016	2	3	13	k__Bacteria;p__Planctomycetes;c__Planctomycetacia;o__Planctomycetales;f__Rubinisphaeraceae;g__SH-PL14;s__
Otu001017	2	3	13	k__Bacteria;p__Proteobacteria;c__Gammaproteobacteria;o__Betaproteobacteriales;f__Nitrosomonadaceae;g__mle1-7;s__
Otu001018	4	6	10	k__Bacteria;p__Chloroflexi;c__Anaerolineae;o__Caldilineales;f__Caldilineaceae;g__;s__
Otu001019	3	2	13	k__Bacteria;p__Planctomycetes;c__OM190;o__planctomycete_A-2;f__;g__;s__
Otu001020	13	9	3	k__Bacteria;p__Proteobacteria;c__Gammaproteobacteria;o__Betaproteobacteriales;f__Rhodocyclaceae;g__Candidatus_Accumulibacter;s__
Otu001021	4	15	5	k__Bacteria;p__Planctomycetes;c__Planctomycetacia;o__Gemmatales;f__Gemmataceae;g__Gemmata;s__
Otu001022	3	5	11	k__Bacteria;p__Planctomycetes;c__Planctomycetacia;o__Pirellulales;f__Pirellulaceae;g__;s__
Otu001025	13	5	5	k__Bacteria;p__Planctomycetes;c__Planctomycetacia;o__Gemmatales;f__Gemmataceae;g__Gemmata;s__
Otu001029	10	5	6	k__Bacteria;p__Proteobacteria;c__Deltaproteobacteria;o__NB1-j;f__;g__;s__
Otu001030	3	3	13	k__Bacteria;p__Planctomycetes;c__Phycisphaerae;o__Tepidisphaerales;f__WD2101_soil_group;g__;s__
Otu001032	7	3	10	k__Bacteria;p__Proteobacteria;c__Gammaproteobacteria;o__Betaproteobacteriales;f__Nitrosomonadaceae;g__MND1;s__
Otu001034	7	13	4	k__Bacteria;p__Proteobacteria;c__Gammaproteobacteria;o__Betaproteobacteriales;f__Chitinibacteraceae;g__Chitinibacter;s__
Otu001036	3	2	13	k__Bacteria;p__Proteobacteria;c__Gammaproteobacteria;o__Betaproteobacteriales
Otu001037	1	2	14	k__Bacteria;p__Proteobacteria;c__Deltaproteobacteria;o__Syntrophobacterales;f__Syntrophaceae;g__;s__
Otu001038	9	11	3	k__Bacteria;p__Bacteroidetes;c__Bacteroidia;o__Sphingobacteriales;f__envOPS_17;g__;s__
Otu001039	2	4	12	k__Bacteria;p__Planctomycetes;c__Phycisphaerae;o__Tepidisphaerales;f__WD2101_soil_group;g__;s__
Otu001041	5	8	8	k__Bacteria;p__Planctomycetes;c__Phycisphaerae;o__Tepidisphaerales;f__WD2101_soil_group;g__;s__
Otu001043	12	10	2	k__Bacteria;p__Planctomycetes;c__Planctomycetacia;o__Isosphaerales;f__Isosphaeraceae;g__;s__
Otu001044	1	4	13	k__Bacteria;p__Proteobacteria;c__Alphaproteobacteria;o__Rhizobiales;f__Xanthobacteraceae;g__;s__
Otu001045	1	2	14	k__Bacteria;p__Proteobacteria;c__Gammaproteobacteria
Otu001051	1	4	13	k__Bacteria;p__Proteobacteria;c__Gammaproteobacteria;o__Methylococcales;f__Methylococcaceae;g__Candidatus_Methylospira;s__
Otu001052	2	2	13	k__Bacteria
Otu001053	4	14	4	k__Bacteria;p__Planctomycetes;c__Planctomycetacia;o__Pirellulales;f__Pirellulaceae;g__;s__
Otu001054	3	14	5	k__Bacteria;p__Verrucomicrobia;c__Verrucomicrobiae;o__Verrucomicrobiales;f__Rubritaleaceae;g__Luteolibacter;s__
Otu001056	1	3	13	k__Bacteria;p__Proteobacteria;c__Gammaproteobacteria;o__Methylococcales;f__Methylomonaceae
Otu001057	2	22	1	k__Bacteria;p__Proteobacteria;c__Gammaproteobacteria;o__Betaproteobacteriales;f__Burkholderiaceae;g__Polynucleobacter;s__
Otu001059	3	7	9	k__Bacteria;p__Chloroflexi;c__Anaerolineae;o__SJA-15;f__;g__;s__
Otu001061	1	5	11	k__Bacteria;p__Planctomycetes;c__Planctomycetacia;o__Gemmatales;f__Gemmataceae;g__;s__
Otu001062	5	1	12	k__Bacteria;p__Planctomycetes;c__Planctomycetacia;o__Pirellulales;f__Pirellulaceae;g__;s__
Otu001063	2	10	7	k__Bacteria;p__Proteobacteria;c__Gammaproteobacteria;o__Betaproteobacteriales;f__Burkholderiaceae;g__Hydrogenophaga;s__
Otu001064	5	10	6	k__Bacteria;p__Planctomycetes;c__Planctomycetacia;o__Isosphaerales;f__Isosphaeraceae;g__;s__
Otu001065	4	6	9	k__Bacteria;p__Chloroflexi;c__KD4-96;o__;f__;g__;s__
Otu001067	11	6	4	k__Bacteria;p__Verrucomicrobia;c__Verrucomicrobiae;o__Pedosphaerales;f__Pedosphaeraceae;g__;s__
Otu001071	3	2	11	k__Bacteria;p__Proteobacteria;c__Deltaproteobacteria;o__Desulfarculales;f__Desulfarculaceae;g__;s__
Otu001072	1	4	12	k__Bacteria;p__Bacteroidetes;c__Bacteroidia;o__Chitinophagales;f__Saprospiraceae;g__;s__
Otu001075	8	6	7	k__Bacteria;p__Proteobacteria;c__Gammaproteobacteria;o__Betaproteobacteriales;f__Rhodocyclaceae
Otu001077	3	1	12	k__Bacteria;p__Proteobacteria;c__Gammaproteobacteria;o__Betaproteobacteriales;f__SC-I-84;g__;s__
Otu001078	3	4	10	k__Bacteria;p__Acidobacteria;c__Blastocatellia_Subgroup_4;o__DS-100;f__;g__;s__
Otu001080	5	4	9	k__Bacteria;p__Planctomycetes;c__Planctomycetacia;o__Gemmatales;f__Gemmataceae;g__Gemmata;s__
Otu001082	6	4	8	k__Bacteria;p__Acidobacteria;c__Subgroup_17;o__;f__;g__;s__
Otu001086	4	5	9	k__Bacteria;p__Acidobacteria;c__Subgroup_6;o__;f__;g__;s__
Otu001087	2	4	11	k__Bacteria;p__Planctomycetes;c__Planctomycetacia;o__Pirellulales;f__Pirellulaceae;g__;s__
Otu001088	3	3	11	k__Bacteria;p__Proteobacteria;c__Gammaproteobacteria;o__Steroidobacterales;f__Steroidobacteraceae;g__;s__
Otu001092	1	2	12	k__Bacteria;p__Planctomycetes;c__Planctomycetacia;o__Planctomycetales;f__;g__;s__
Otu001094	10	11	1	k__Bacteria;p__Nitrospirae;c__Nitrospira;o__Nitrospirales;f__Nitrospiraceae;g__Nitrospira;s__
Otu001098	2	13	5	k__Bacteria;p__Planctomycetes;c__Planctomycetacia;o__Planctomycetales;f__Rubinisphaeraceae;g__SH-PL14;s__Planctomyces_sp_SH-PL14
Otu001099	2	2	12	k__Bacteria;p__Acidobacteria;c__Subgroup_6;o__;f__;g__;s__
Otu001100	1	4	11	k__Bacteria;p__Proteobacteria;c__Gammaproteobacteria;o__JG36-GS-52;f__;g__;s__
Otu001101	14	3	4	k__Bacteria;p__Planctomycetes;c__Planctomycetacia;o__Planctomycetales;f__;g__;s__
Otu001102	9	6	5	k__Bacteria;p__Proteobacteria;c__Gammaproteobacteria
Otu001104	3	4	10	k__Bacteria;p__Proteobacteria;c__Deltaproteobacteria;o__Myxococcales;f__Archangiaceae;g__Anaeromyxobacter;s__
Otu001107	2	1	12	k__Bacteria;p__Proteobacteria;c__Deltaproteobacteria
Otu001108	11	4	5	k__Bacteria;p__Planctomycetes;c__Planctomycetacia;o__Pirellulales;f__Pirellulaceae;g__;s__
Otu001109	20	1	2	k__Bacteria;p__Planctomycetes;c__Planctomycetacia;o__Isosphaerales;f__Isosphaeraceae;g__;s__
Otu001110	8	7	5	k__Bacteria;p__Planctomycetes;c__Planctomycetacia;o__Gemmatales;f__Gemmataceae;g__;s__
Otu001111	2	1	12	k__Bacteria;p__Acidobacteria;c__Holophagae;o__Subgroup_7;f__;g__;s__
Otu001112	4	5	9	k__Bacteria;p__Proteobacteria;c__Deltaproteobacteria;o__MBNT15;f__;g__;s__
Otu001113	16	2	3	k__Bacteria;p__Planctomycetes;c__Phycisphaerae;o__mle1-8;f__;g__;s__
Otu001114	4	4	9	k__Bacteria;p__Chloroflexi;c__KD4-96;o__;f__;g__;s__
Otu001116	7	2	8	k__Bacteria;p__Planctomycetes;c__Phycisphaerae;o__Tepidisphaerales;f__WD2101_soil_group;g__;s__
Otu001119	5	8	6	k__Bacteria;p__Proteobacteria;c__Deltaproteobacteria;o__Myxococcales;f__Archangiaceae;g__Anaeromyxobacter;s__
Otu001120	6	5	7	k__Bacteria;p__Planctomycetes;c__Planctomycetacia;o__Planctomycetales;f__;g__;s__
Otu001121	3	1	11	k__Bacteria;p__Bacteroidetes;c__Bacteroidia;o__Sphingobacteriales
Otu001124	1	2	12	k__Bacteria;p__Rokubacteria;c__NC10;o__Rokubacteriales
Otu001125	5	3	9	k__Bacteria;p__Actinobacteria;c__Acidimicrobiia;o__IMCC26256;f__;g__;s__
Otu001127	2	5	10	k__Bacteria;p__Chloroflexi;c__Anaerolineae;o__SBR1031;f__;g__;s__
Otu001129	2	2	11	k__Bacteria;p__Actinobacteria;c__Thermoleophilia;o__Solirubrobacterales;f__Solirubrobacteraceae;g__Conexibacter;s__
Otu001130	1	6	9	k__Bacteria;p__Proteobacteria;c__Gammaproteobacteria;o__Betaproteobacteriales
Otu001131	6	6	6	k__Bacteria;p__Planctomycetes;c__Planctomycetacia;o__Isosphaerales;f__Isosphaeraceae
Otu001132	1	2	12	k__Bacteria;p__Acidobacteria;c__Subgroup_6
Otu001133	6	7	6	k__Bacteria;p__Planctomycetes;c__Phycisphaerae;o__Tepidisphaerales;f__WD2101_soil_group;g__;s__
Otu001135	9	4	6	k__Bacteria;p__Acidobacteria;c__Subgroup_6;o__;f__;g__;s__
Otu001136	6	6	6	k__Bacteria;p__Planctomycetes;c__Planctomycetacia;o__Isosphaerales;f__Isosphaeraceae;g__;s__
Otu001137	2	11	5	k__Bacteria;p__Planctomycetes;c__Planctomycetacia;o__Gemmatales;f__Gemmataceae
Otu001138	10	5	5	k__Bacteria;p__Planctomycetes;c__Planctomycetacia;o__Pirellulales;f__Pirellulaceae;g__;s__
Otu001145	1	1	12	k__Bacteria;p__Proteobacteria;c__Gammaproteobacteria;o__Betaproteobacteriales;f__Burkholderiaceae
Otu001146	3	3	10	k__Bacteria;p__Proteobacteria;c__Gammaproteobacteria;o__Gammaproteobacteria_Incertae_Sedis;f__Unknown_Family;g__;s__
Otu001148	10	1	7	k__Bacteria;p__Proteobacteria;c__Alphaproteobacteria;o__Rhodospirillales;f__Rhodopirillaceae;g__Defluviicoccus;s__
Otu001149	4	8	6	k__Bacteria;p__Actinobacteria;c__Actinobacteria
Otu001153	5	11	4	k__Bacteria;p__Actinobacteria;c__Actinobacteria
Otu001157	2	4	10	k__Bacteria;p__Chloroflexi;c__Anaerolineae;o__Ardenticatenales;f__;g__;s__
Otu001158	11	3	5	k__Bacteria;p__Planctomycetes;c__Planctomycetacia;o__Isosphaerales;f__Isosphaeraceae;g__;s__
Otu001159	2	2	11	k__Bacteria;p__Proteobacteria;c__Deltaproteobacteria;o__Myxococcales;f__Archangiaceae;g__Anaeromyxobacter
Otu001160	7	1	8	k__Bacteria;p__Planctomycetes;c__Planctomycetacia;o__Pirellulales;f__Pirellulaceae
Otu001161	2	2	11	k__Bacteria;p__Proteobacteria;c__Alphaproteobacteria;o__Rhizobiales;f__Xanthobacteraceae;g__;s__
Otu001164	1	3	10	k__Bacteria;p__Chloroflexi;c__Anaerolineae;o__SJA-15;f__;g__;s__
Otu001165	1	2	11	k__Bacteria;p__Proteobacteria;c__Deltaproteobacteria;o__Desulfarculales;f__Desulfarculaceae;g__;s__
Otu001168	5	1	9	k__Bacteria;p__Chloroflexi;c__Anaerolineae;o__C10-SB1A;f__;g__;s__
Otu001169	2	3	10	k__Bacteria;p__Proteobacteria;c__Gammaproteobacteria
Otu001170	8	7	4	k__Bacteria;p__Planctomycetes;c__Planctomycetacia;o__Planctomycetales;f__Rubinisphaeraceae;g__;s__
Otu001172	1	2	11	k__Bacteria;p__Proteobacteria;c__Alphaproteobacteria;o__Rhodospirillales;f__Rhodopirillaceae;g__Defluviicoccus;s__
Otu001173	3	1	11	k__Bacteria;p__Proteobacteria;c__Alphaproteobacteria;o__Rhizobiales;f__Rhizobiales_Incertae_Sedis;g__Nordella;s__
Otu001174	3	5	8	k__Bacteria;p__Verrucomicrobia;c__Verrucomicrobiae;o__Verrucomicrobiales;f__Rubritaleaceae;g__Luteolibacter
Otu001178	4	4	8	k__Bacteria;p__Proteobacteria;c__Deltaproteobacteria;o__Sva0485
Otu001179	1	1	12	k__Bacteria;p__Proteobacteria;c__Gammaproteobacteria;o__Gammaproteobacteria_Incertae_Sedis;f__Unknown_Family;g__Acidibacter;s__
Otu001180	2	1	11	k__Bacteria;p__Proteobacteria;c__Alphaproteobacteria;o__Rhizobiales;f__KF-JG30-B3;g__;s__
Otu001184	3	8	7	k__Bacteria;p__Planctomycetes;c__Phycisphaerae;o__Tepidisphaerales;f__WD2101_soil_group;g__;s__
Otu001190	15	5	1	k__Bacteria;p__Firmicutes;c__Clostridia;o__Clostridiales;f__Peptostreptococcaceae;g__Paeniclostridium
Otu001191	7	2	7	k__Bacteria;p__Verrucomicrobia;c__Verrucomicrobiae;o__Pedosphaerales;f__Pedosphaeraceae;g__ADurbBin063-1
Otu001194	1	1	12	k__Bacteria;p__Proteobacteria;c__Gammaproteobacteria
Otu001197	1	3	10	k__Bacteria;p__Chloroflexi;c__Anaerolineae;o__SBR1031;f__A4b
Otu001198	1	1	12	k__Bacteria
Otu001200	5	2	9	k__Bacteria;p__Planctomycetes;c__Planctomycetacia;o__Pirellulales;f__Pirellulaceae;g__Pirellula;s__
Otu001201	5	4	8	k__Bacteria;p__Planctomycetes;c__Phycisphaerae;o__Tepidisphaerales;f__WD2101_soil_group
Otu001202	11	5	3	k__Bacteria;p__Planctomycetes;c__Planctomycetacia;o__Planctomycetales;f__Rubinisphaeraceae;g__SH-PL14;s__
Otu001205	9	5	4	k__Bacteria;p__Planctomycetes;c__Planctomycetacia;o__Planctomycetales;f__;g__;s__
Otu001207	3	6	7	k__Bacteria;p__Proteobacteria;c__Gammaproteobacteria;o__Methylococcales;f__Methylomonaceae
Otu001208	1	1	11	k__Bacteria;p__Proteobacteria;c__Gammaproteobacteria;o__PLTA13;f__;g__;s__
Otu001210	7	5	5	k__Bacteria;p__Planctomycetes;c__Planctomycetacia;o__Pirellulales;f__Pirellulaceae;g__;s__
Otu001211	5	5	7	k__Bacteria;p__Planctomycetes;c__Planctomycetacia;o__Pirellulales;f__Pirellulaceae;g__Pirellula;s__
Otu001212	2	1	10	k__Bacteria;p__Proteobacteria;c__Deltaproteobacteria;o__Syntrophobacterales;f__Syntrophobacteraceae;g__;s__
Otu001214	8	5	5	k__Bacteria;p__Proteobacteria;c__Gammaproteobacteria;o__Betaproteobacteriales;f__SC-I-84;g__;s__
Otu001215	4	2	9	k__Bacteria;p__Planctomycetes;c__Planctomycetacia;o__Pirellulales;f__Pirellulaceae;g__;s__
Otu001218	11	3	4	k__Bacteria;p__Planctomycetes;c__Planctomycetacia;o__Isosphaerales;f__Isosphaeraceae
Otu001219	1	3	10	k__Bacteria;p__Planctomycetes;c__Planctomycetacia;o__Gemmatales;f__Gemmataceae;g__;s__
Otu001220	1	2	10	k__Bacteria;p__Acidobacteria;c__Subgroup_6
Otu001221	7	2	7	k__Bacteria;p__Planctomycetes;c__Planctomycetacia;o__Planctomycetales;f__;g__;s__
Otu001222	6	6	5	k__Bacteria;p__Planctomycetes;c__Planctomycetacia;o__Pirellulales;f__Pirellulaceae;g__Pirellula;s__
Otu001223	10	6	2	k__Bacteria;p__Proteobacteria;c__Gammaproteobacteria;o__Cellvibrionales;f__Spongiibacteraceae;g__BD1-7_clade;s__
Otu001226	7	8	3	k__Bacteria;p__Bacteroidetes;c__Bacteroidia;o__Sphingobacteriales;f__envOPS_17;g__;s__
Otu001227	14	1	3	k__Bacteria;p__Planctomycetes;c__Planctomycetacia;o__Pirellulales;f__Pirellulaceae;g__;s__
Otu001229	5	1	8	k__Bacteria;p__Verrucomicrobia;c__Verrucomicrobiae;o__Pedosphaerales;f__Pedosphaeraceae;g__;s__
Otu001231	2	1	10	k__Bacteria;p__Verrucomicrobia;c__Verrucomicrobiae;o__Opitutales;f__Opitutaceae
Otu001232	11	8	1	k__Bacteria;p__Verrucomicrobia;c__Verrucomicrobiae;o__Opitutales;f__Opitutaceae
Otu001234	2	6	7	k__Bacteria;p__Proteobacteria;c__Gammaproteobacteria;o__Betaproteobacteriales;f__SC-I-84
Otu001236	14	2	3	k__Bacteria;p__Planctomycetes;c__Planctomycetacia;o__Pirellulales;f__Pirellulaceae;g__Blastopirellula;s__
Otu001239	7	7	4	k__Bacteria;p__Verrucomicrobia;c__Verrucomicrobiae;o__Pedosphaerales;f__Pedosphaeraceae;g__;s__
Otu001240	1	1	11	k__Bacteria;p__Planctomycetes;c__Planctomycetacia;o__Gemmatales;f__Gemmataceae;g__;s__
Otu001242	1	1	11	k__Bacteria;p__Chloroflexi;c__Anaerolineae;o__SJA-15;f__;g__;s__
Otu001243	1	4	9	k__Bacteria;p__Proteobacteria;c__Gammaproteobacteria
Otu001245	2	5	8	k__Bacteria;p__Proteobacteria;c__Gammaproteobacteria;o__Betaproteobacteriales;f__Burkholderiaceae
Otu001247	1	2	10	k__Bacteria;p__Bacteroidetes;c__Bacteroidia;o__Bacteroidales;f__Bacteroidetes_vadinHA17;g__;s__
Otu001248	2	1	10	k__Bacteria;p__Gemmatimonadetes;c__AKAU4049;o__;f__;g__;s__
Otu001252	10	9	1	k__Bacteria;p__Planctomycetes;c__Pla4_lineage;o__;f__;g__;s__
Otu001253	3	9	5	k__Bacteria;p__Proteobacteria;c__Gammaproteobacteria;o__Betaproteobacteriales;f__Nitrosomonadaceae;g__966-1;s__
Otu001255	2	12	3	k__Bacteria;p__Verrucomicrobia;c__Verrucomicrobiae;o__Pedosphaerales;f__Pedosphaeraceae
Otu001259	3	3	8	k__Bacteria;p__Acidobacteria;c__Holophagae;o__Subgroup_7;f__;g__;s__
Otu001260	9	3	4	k__Bacteria;p__Verrucomicrobia;c__Verrucomicrobiae;o__Verrucomicrobiales;f__Rubritaleaceae;g__Luteolibacter
Otu001261	2	1	10	k__Bacteria;p__Proteobacteria;c__Gammaproteobacteria;o__Betaproteobacteriales;f__Nitrosomonadaceae;g__MND1;s__
Otu001262	9	1	6	k__Bacteria;p__Proteobacteria;c__Alphaproteobacteria;o__;f__;g__;s__
Otu001263	5	6	5	k__Bacteria;p__Verrucomicrobia;c__Verrucomicrobiae;o__Chthoniobacterales;f__Chthoniobacteraceae;g__Chthoniobacter;s__
Otu001265	1	12	4	k__Bacteria;p__Epsilonbacteraeota;c__Campylobacteria;o__Campylobacterales;f__Arcobacteraceae;g__Arcobacter;s__
Otu001266	6	5	5	k__Bacteria;p__Bacteroidetes;c__Bacteroidia;o__Cytophagales;f__Microscillaceae;g__OLB12;s__
Otu001268	1	4	8	k__Bacteria;p__Bacteroidetes;c__Bacteroidia;o__Flavobacteriales;f__Crocinitomicaceae;g__Fluviicola;s__
Otu001269	3	1	10	k__Archaea;p__Euryarchaeota;c__Methanomicrobia;o__Methanosarcinales;f__Methanosaetaceae;g__Methanosaeta;s__
Otu001273	4	6	6	k__Bacteria;p__Proteobacteria;c__Gammaproteobacteria;o__Betaproteobacteriales;f__Burkholderiaceae
Otu001274	4	4	7	k__Bacteria;p__Verrucomicrobia;c__Verrucomicrobiae;o__S-BQ2-57_soil_group;f__;g__;s__
Otu001276	8	5	3	k__Bacteria;p__Planctomycetes;c__Planctomycetacia;o__Pirellulales;f__Pirellulaceae;g__;s__
Otu001277	3	10	4	k__Bacteria;p__Planctomycetes;c__Planctomycetacia;o__Pirellulales;f__Pirellulaceae;g__;s__
Otu001281	1	1	10	k__Bacteria;p__Bacteroidetes;c__Bacteroidia;o__Sphingobacteriales;f__Lentimicrobiaceae;g__;s__
Otu001284	6	4	5	k__Bacteria;p__Chloroflexi;c__Anaerolineae;o__Caldilineales;f__Caldilineaceae;g__;s__
Otu001286	5	6	4	k__Bacteria;p__Verrucomicrobia;c__Verrucomicrobiae;o__Verrucomicrobiales;f__Rubritaleaceae;g__Luteolibacter
Otu001287	8	7	2	k__Bacteria;p__Gemmatimonadetes;c__Gemmatimonadetes;o__Gemmatimonadales;f__Gemmatimonadaceae;g__;s__
Otu001288	10	7	1	k__Bacteria;p__Epsilonbacteraeota;c__Campylobacteria;o__Campylobacterales;f__Sulfurospirillaceae;g__Sulfurospirillum
Otu001290	5	3	7	k__Bacteria;p__Proteobacteria;c__Deltaproteobacteria;o__Desulfarculales;f__Desulfarculaceae;g__;s__
Otu001291	5	7	4	k__Bacteria;p__Planctomycetes;c__Planctomycetacia;o__Gemmatales;f__Gemmataceae;g__;s__
Otu001295	1	1	10	k__Bacteria;p__Proteobacteria;c__Gammaproteobacteria;o__Methylococcales;f__Methylomonaceae;g__Methylomicrobium;s__
Otu001298	10	3	3	k__Bacteria;p__Planctomycetes;c__Phycisphaerae;o__Tepidisphaerales;f__WD2101_soil_group;g__;s__
Otu001300	3	2	9	k__Bacteria;p__Proteobacteria;c__Alphaproteobacteria;o__Rhizobiales
Otu001302	6	9	3	k__Bacteria;p__Proteobacteria;c__Alphaproteobacteria;o__Acetobacterales;f__Acetobacteraceae;g__Roseomonas
Otu001303	1	6	7	k__Bacteria;p__Proteobacteria;c__Gammaproteobacteria
Otu001304	4	1	8	k__Bacteria;p__Chloroflexi;c__Anaerolineae;o__Anaerolineales;f__Anaerolineaceae;g__;s__
Otu001309	6	11	1	k__Bacteria;p__Bacteroidetes;c__Bacteroidia;o__Sphingobacteriales;f__Sphingobacteriaceae;g__Solitalea;s__
Otu001310	2	5	7	k__Bacteria;p__Proteobacteria;c__Gammaproteobacteria;o__Betaproteobacteriales;f__Nitrosomonadaceae;g__DSSD61;s__
Otu001312	2	6	7	k__Bacteria;p__Verrucomicrobia;c__Verrucomicrobiae;o__Pedosphaerales;f__Pedosphaeraceae;g__;s__
Otu001315	4	3	7	k__Bacteria;p__Chloroflexi;c__Anaerolineae;o__SJA-15;f__;g__;s__
Otu001316	1	2	9	k__Bacteria;p__Planctomycetes;c__Planctomycetacia;o__Gemmatales;f__Gemmataceae;g__Gemmata;s__
Otu001317	9	5	3	k__Bacteria;p__Proteobacteria;c__Gammaproteobacteria;o__Betaproteobacteriales;f__Burkholderiaceae
Otu001319	4	4	6	k__Bacteria;p__Planctomycetes;c__Planctomycetacia;o__Pirellulales;f__Pirellulaceae;g__Pirellula
Otu001321	9	1	5	k__Bacteria;p__Verrucomicrobia;c__Verrucomicrobiae;o__Pedosphaerales;f__Pedosphaeraceae;g__ADurbBin063-1;s__
Otu001324	5	2	7	k__Bacteria;p__Verrucomicrobia;c__Verrucomicrobiae;o__Verrucomicrobiales;f__Rubritaleaceae
Otu001326	2	2	9	k__Bacteria;p__Actinobacteria;c__Thermoleophilia;o__;f__;g__;s__
Otu001327	5	2	7	k__Bacteria;p__Planctomycetes;c__OM190
Otu001328	1	1	10	k__Bacteria;p__Proteobacteria;c__Gammaproteobacteria;o__Betaproteobacteriales;f__Rhodocyclaceae;g__Azospira;s__Azospira_restricta
Otu001335	8	3	4	k__Bacteria;p__Chloroflexi;c__Anaerolineae;o__Caldilineales;f__Caldilineaceae;g__;s__
Otu001337	5	5	5	k__Bacteria;p__Planctomycetes;c__Pla4_lineage;o__;f__;g__;s__
Otu001338	8	6	2	k__Bacteria;p__Planctomycetes;c__Planctomycetacia;o__Gemmatales;f__Gemmataceae;g__Gemmata;s__
Otu001339	1	1	10	k__Bacteria;p__Planctomycetes;c__Planctomycetacia;o__Pirellulales;f__Pirellulaceae;g__Blastopirellula;s__
Otu001340	1	4	8	k__Bacteria;p__Firmicutes;c__Clostridia;o__Clostridiales;f__Clostridiaceae_1
Otu001341	2	11	3	k__Bacteria;p__Planctomycetes;c__Phycisphaerae;o__Tepidisphaerales;f__WD2101_soil_group;g__;s__
Otu001342	4	3	6	k__Bacteria;p__Chloroflexi;c__Anaerolineae;o__Caldilineales;f__Caldilineaceae;g__;s__
Otu001343	11	3	2	k__Bacteria;p__Planctomycetes;c__Phycisphaerae;o__Tepidisphaerales;f__WD2101_soil_group;g__;s__
Otu001345	1	1	9	k__Bacteria;p__Acidobacteria;c__Subgroup_22;o__;f__;g__;s__
Otu001346	8	2	5	k__Bacteria;p__Proteobacteria;c__Gammaproteobacteria;o__Betaproteobacteriales;f__Nitrosomonadaceae;g__mle1-7;s__
Otu001347	6	6	4	k__Bacteria;p__Verrucomicrobia;c__Verrucomicrobiae;o__Pedosphaerales;f__Pedosphaeraceae
Otu001350	2	1	9	k__Bacteria;p__Actinobacteria;c__Thermoleophilia;o__Gaiellales;f__Gaiellaceae;g__Gaiella;s__
Otu001351	6	2	6	k__Bacteria;p__Planctomycetes;c__Phycisphaerae;o__Tepidisphaerales;f__WD2101_soil_group;g__;s__
Otu001353	5	5	5	k__Bacteria;p__Proteobacteria;c__Alphaproteobacteria;o__Rhizobiales;f__Pleomorphomonadaceae;g__Prosthecomicrobium;s__
Otu001355	6	1	6	k__Bacteria;p__Proteobacteria;c__Alphaproteobacteria;o__Reyranellales;f__Reyranellaceae;g__;s__
Otu001356	2	2	8	k__Bacteria;p__Planctomycetes;c__Planctomycetacia;o__Pirellulales;f__Pirellulaceae;g__;s__
Otu001363	2	5	6	k__Bacteria;p__Planctomycetes;c__Planctomycetacia;o__Pirellulales;f__Pirellulaceae;g__;s__
Otu001364	3	4	6	k__Bacteria
Otu001366	6	9	2	k__Bacteria;p__Planctomycetes;c__Planctomycetacia;o__Pirellulales;f__Pirellulaceae
Otu001368	5	11	1	k__Bacteria;p__Planctomycetes;c__Planctomycetacia;o__Isosphaerales;f__Isosphaeraceae;g__;s__
Otu001370	4	1	8	k__Archaea;p__Euryarchaeota;c__Methanomicrobia;o__Methanomicrobiales;f__Methanoregulaceae;g__Methanolinea;s__
Otu001376	1	10	3	k__Bacteria;p__Proteobacteria;c__Gammaproteobacteria;o__Steroidobacterales;f__Steroidobacteraceae;g__;s__
Otu001377	3	1	8	k__Bacteria;p__Planctomycetes;c__OM190;o__planctomycete_A-2;f__;g__;s__
Otu001378	5	6	4	k__Bacteria;p__Chloroflexi;c__Anaerolineae;o__Caldilineales;f__Caldilineaceae
Otu001381	1	1	9	k__Bacteria;p__Bacteroidetes;c__Bacteroidia;o__Sphingobacteriales;f__AKYH767;g__;s__
Otu001383	1	14	1	k__Bacteria;p__Bacteroidetes;c__Bacteroidia;o__Flavobacteriales;f__Crocinitomicaceae;g__Fluviicola;s__
Otu001385	1	2	9	k__Bacteria;p__Proteobacteria;c__Gammaproteobacteria;o__Betaproteobacteriales;f__Nitrosomonadaceae;g__mle1-7;s__
Otu001386	6	3	5	k__Bacteria;p__Chloroflexi;c__Anaerolineae;o__SJA-15;f__;g__;s__
Otu001388	3	2	7	k__Bacteria;p__Chloroflexi;c__Anaerolineae;o__SBR1031;f__;g__;s__
Otu001394	5	5	4	k__Bacteria;p__Chloroflexi;c__Anaerolineae;o__Caldilineales;f__Caldilineaceae
Otu001396	2	1	8	k__Bacteria;p__Proteobacteria;c__Gammaproteobacteria;o__Betaproteobacteriales;f__Nitrosomonadaceae;g__mle1-7;s__
Otu001397	3	1	8	k__Bacteria;p__Proteobacteria;c__Deltaproteobacteria;o__Desulfobacterales;f__Desulfobacteraceae;g__Sva0081_sediment_group
Otu001398	3	2	7	k__Bacteria;p__Planctomycetes;c__Phycisphaerae;o__Pla1_lineage;f__;g__;s__
Otu001402	2	2	8	k__Bacteria;p__Proteobacteria;c__Gammaproteobacteria;o__Betaproteobacteriales;f__Rhodocyclaceae
Otu001406	6	4	4	k__Bacteria;p__Planctomycetes;c__Phycisphaerae;o__Tepidisphaerales;f__WD2101_soil_group;g__;s__
Otu001407	1	1	8	k__Bacteria;p__Bacteroidetes;c__Bacteroidia;o__Flavobacteriales;f__Flavobacteriaceae;g__Flavobacterium
Otu001408	8	3	4	k__Bacteria;p__Bacteroidetes;c__Ignavibacteria;o__Kryptoniales;f__BSV26;g__;s__
Otu001411	3	2	7	k__Bacteria;p__Proteobacteria;c__Alphaproteobacteria;o__Rhizobiales;f__Pleomorphomonadaceae;g__Chthonobacter
Otu001413	1	6	6	k__Bacteria;p__Proteobacteria;c__Gammaproteobacteria;o__Betaproteobacteriales;f__Burkholderiaceae;g__Curvibacter;s__
Otu001415	2	12	2	k__Bacteria;p__Planctomycetes;c__Planctomycetacia;o__Isosphaerales;f__Isosphaeraceae;g__;s__
Otu001416	5	2	6	k__Bacteria;p__Planctomycetes;c__Planctomycetacia;o__Gemmatales;f__Gemmataceae;g__;s__
Otu001419	2	2	7	k__Bacteria;p__Proteobacteria;c__Gammaproteobacteria;o__Steroidobacterales;f__Steroidobacteraceae
Otu001420	2	1	8	k__Bacteria;p__Bacteroidetes;c__Bacteroidia;o__Sphingobacteriales
Otu001421	1	1	9	k__Bacteria;p__Proteobacteria;c__Gammaproteobacteria;o__Betaproteobacteriales;f__SC-I-84;g__;s__
Otu001422	3	4	6	k__Bacteria;p__Chloroflexi;c__Anaerolineae;o__SBR1031;f__;g__;s__
Otu001424	1	1	8	k__Bacteria;p__Chloroflexi;c__Anaerolineae;o__RBG-13-54-9;f__;g__;s__
Otu001426	2	1	8	k__Bacteria;p__Planctomycetes;c__Planctomycetacia;o__Gemmatales;f__Gemmataceae;g__;s__
Otu001427	1	1	9	k__Bacteria;p__Lentisphaerae;c__Oligosphaeria;o__Oligosphaerales;f__Lenti-02;g__;s__
Otu001428	6	1	6	k__Bacteria;p__Acidobacteria;c__Acidobacteriia;o__Solibacterales;f__Solibacteraceae_Subgroup_3;g__Bryobacter;s__
Otu001430	8	6	2	k__Bacteria;p__Planctomycetes;c__Planctomycetacia;o__Gemmatales;f__Gemmataceae;g__Gemmata
Otu001431	3	2	7	k__Bacteria;p__Nitrospirae;c__Thermodesulfovibrionia;o__;f__;g__;s__
Otu001432	3	3	6	k__Bacteria;p__Verrucomicrobia;c__Verrucomicrobiae;o__Pedosphaerales;f__Pedosphaeraceae;g__;s__
Otu001433	8	7	1	k__Bacteria;p__Actinobacteria;c__Actinobacteria;o__PeM15;f__;g__;s__
Otu001435	2	3	7	k__Bacteria;p__Proteobacteria;c__Alphaproteobacteria;o__Rhodospirillales;f__Rhodopirillaceae;g__Defluviicoccus;s__
Otu001437	11	2	2	k__Bacteria;p__Planctomycetes;c__Planctomycetacia;o__Pirellulales;f__Pirellulaceae;g__;s__
Otu001439	3	11	1	k__Bacteria;p__Proteobacteria;c__Gammaproteobacteria;o__Xanthomonadales;f__Xanthomonadaceae;g__Arenimonas
Otu001454	8	1	5	k__Bacteria;p__Proteobacteria;c__Alphaproteobacteria;o__Rhodospirillales;f__Rhodopirillaceae;g__Defluviicoccus;s__
Otu001462	1	3	7	k__Bacteria;p__Proteobacteria;c__Deltaproteobacteria;o__MBNT15;f__;g__;s__
Otu001463	4	2	6	k__Bacteria;p__Verrucomicrobia;c__Verrucomicrobiae;o__Pedosphaerales;f__Pedosphaeraceae;g__;s__
Otu001464	1	1	8	k__Bacteria;p__Chloroflexi;c__Anaerolineae;o__SJA-15;f__;g__;s__
Otu001466	3	8	3	k__Bacteria;p__Planctomycetes;c__Planctomycetacia;o__Pirellulales;f__Pirellulaceae
Otu001468	2	5	5	k__Bacteria;p__Verrucomicrobia;c__Verrucomicrobiae;o__Pedosphaerales;f__Pedosphaeraceae;g__;s__
Otu001470	1	3	7	k__Bacteria;p__Proteobacteria;c__Deltaproteobacteria;o__Desulfuromonadales;f__Geobacteraceae;g__Geobacter
Otu001472	4	3	5	k__Bacteria;p__Verrucomicrobia;c__Verrucomicrobiae;o__Pedosphaerales;f__Pedosphaeraceae
Otu001474	3	5	5	k__Bacteria;p__Planctomycetes;c__Planctomycetacia;o__Planctomycetales;f__Rubinisphaeraceae;g__SH-PL14;s__Planctomyces_sp_SCGC_AG-212-M04
Otu001478	1	2	8	k__Bacteria;p__Proteobacteria;c__Gammaproteobacteria
Otu001481	7	5	2	k__Bacteria;p__Chloroflexi;c__KD4-96;o__;f__;g__;s__
Otu001488	2	1	8	k__Bacteria;p__Proteobacteria;c__Deltaproteobacteria;o__NB1-j;f__;g__;s__
Otu001489	10	2	2	k__Bacteria;p__Firmicutes;c__Clostridia;o__Clostridiales;f__Lachnospiraceae;g__Lachnoclostridium;s__
Otu001492	2	7	4	k__Bacteria;p__Acidobacteria;c__Acidobacteriia;o__Solibacterales;f__Solibacteraceae_Subgroup_3;g__Bryobacter;s__
Otu001494	3	2	6	k__Bacteria
Otu001495	3	2	6	k__Bacteria;p__Verrucomicrobia;c__Verrucomicrobiae;o__Pedosphaerales;f__Pedosphaeraceae;g__;s__
Otu001496	1	1	8	k__Bacteria;p__Acidobacteria;c__Subgroup_6;o__;f__;g__;s__
Otu001497	7	1	5	k__Bacteria;p__Chloroflexi;c__Anaerolineae;o__SBR1031;f__;g__;s__
Otu001500	6	2	5	k__Bacteria;p__BRC1;c__soil_bacterium_WWH121;o__;f__;g__;s__
Otu001501	2	1	7	k__Bacteria;p__Actinobacteria;c__Actinobacteria;o__Propionibacteriales;f__Nocardioidaceae
Otu001503	1	1	8	k__Bacteria;p__Proteobacteria;c__Alphaproteobacteria;o__;f__;g__;s__
Otu001504	5	5	3	k__Bacteria;p__Planctomycetes;c__OM190;o__;f__;g__;s__
Otu001505	3	5	5	k__Bacteria;p__Verrucomicrobia;c__Verrucomicrobiae;o__Opitutales;f__Opitutaceae;g__Alterococcus;s__
Otu001506	1	1	8	k__Bacteria;p__Bacteroidetes;c__Bacteroidia;o__Bacteroidales;f__Bacteroidetes_vadinHA17;g__;s__
Otu001509	1	5	5	k__Bacteria;p__Verrucomicrobia;c__Verrucomicrobiae;o__Verrucomicrobiales;f__DEV007;g__;s__
Otu001513	6	6	2	k__Bacteria;p__Planctomycetes;c__Planctomycetacia;o__Pirellulales;f__Pirellulaceae;g__Pirellula;s__
Otu001517	11	2	1	k__Bacteria;p__Planctomycetes;c__Planctomycetacia;o__Pirellulales;f__Pirellulaceae
Otu001518	4	2	5	k__Bacteria;p__Proteobacteria;c__Alphaproteobacteria;o__Rhodospirillales;f__Rhodopirillaceae;g__Defluviicoccus;s__
Otu001522	1	1	8	k__Bacteria;p__Proteobacteria;c__Deltaproteobacteria;o__NB1-j;f__;g__;s__
Otu001528	3	1	6	k__Bacteria
Otu001531	1	4	6	k__Bacteria;p__Planctomycetes;c__Planctomycetacia;o__Gemmatales;f__Gemmataceae
Otu001534	4	6	3	k__Bacteria;p__Proteobacteria;c__Alphaproteobacteria;o__Rhodospirillales;f__Rhodopirillaceae;g__Defluviicoccus;s__
Otu001538	3	3	5	k__Bacteria;p__Proteobacteria;c__Deltaproteobacteria;o__Desulfuromonadales;f__Geobacteraceae;g__Geobacter
Otu001539	2	6	4	k__Bacteria;p__Actinobacteria;c__Acidimicrobiia;o__Microtrichales;f__;g__;s__
Otu001545	1	1	8	k__Bacteria;p__Acidobacteria;c__Thermoanaerobaculia;o__Thermoanaerobaculales;f__Thermoanaerobaculaceae;g__Subgroup_10;s__
Otu001548	3	3	5	k__Bacteria;p__Nitrospirae;c__Thermodesulfovibrionia;o__;f__;g__;s__
Otu001550	1	4	6	k__Bacteria;p__Planctomycetes;c__Planctomycetacia;o__Pirellulales;f__Pirellulaceae
Otu001552	4	4	4	k__Bacteria;p__Proteobacteria;c__Alphaproteobacteria;o__Acetobacterales;f__Acetobacteraceae;g__;s__
Otu001560	4	1	5	k__Bacteria;p__Proteobacteria;c__Deltaproteobacteria;o__Syntrophobacterales;f__Syntrophaceae;g__;s__
Otu001561	1	1	7	k__Bacteria;p__Proteobacteria;c__Deltaproteobacteria;o__Myxococcales;f__bacteriap25;g__;s__
Otu001564	9	3	1	k__Bacteria;p__Proteobacteria;c__Gammaproteobacteria;o__Competibacterales;f__Competibacteraceae;g__Candidatus_Competibacter;s__
Otu001566	1	9	3	k__Bacteria;p__Planctomycetes;c__Planctomycetacia;o__Isosphaerales;f__Isosphaeraceae;g__;s__
Otu001567	3	4	5	k__Bacteria;p__Planctomycetes;c__Phycisphaerae;o__Tepidisphaerales;f__WD2101_soil_group;g__;s__
Otu001568	3	2	5	k__Bacteria;p__Verrucomicrobia;c__Verrucomicrobiae;o__Pedosphaerales;f__Pedosphaeraceae;g__;s__
Otu001572	4	1	5	k__Bacteria;p__Verrucomicrobia;c__Verrucomicrobiae;o__Pedosphaerales;f__Pedosphaeraceae;g__;s__
Otu001575	2	11	1	k__Bacteria;p__Planctomycetes;c__Phycisphaerae;o__Tepidisphaerales;f__WD2101_soil_group;g__;s__
Otu001581	8	3	2	k__Bacteria;p__Verrucomicrobia;c__Verrucomicrobiae;o__Chthoniobacterales;f__Chthoniobacteraceae;g__Chthoniobacter;s__
Otu001586	6	4	2	k__Bacteria;p__Planctomycetes;c__Planctomycetacia;o__Gemmatales;f__Gemmataceae;g__;s__
Otu001590	4	2	5	k__Bacteria;p__Proteobacteria;c__Gammaproteobacteria;o__Betaproteobacteriales;f__Burkholderiaceae
Otu001592	1	3	6	k__Bacteria;p__Actinobacteria;c__Acidimicrobiia;o__Microtrichales;f__Ilumatobacteraceae;g__CL500-29_marine_group;s__
Otu001593	6	1	4	k__Bacteria;p__Proteobacteria;c__Gammaproteobacteria;o__Betaproteobacteriales;f__Chitinimonadaceae;g__Chitinivorax;s__
Otu001594	2	6	4	k__Bacteria;p__Planctomycetes;c__Planctomycetacia;o__Pirellulales;f__Pirellulaceae;g__Pirellula;s__
Otu001596	2	1	7	k__Bacteria;p__Acidobacteria;c__Thermoanaerobaculia;o__Thermoanaerobaculales;f__Thermoanaerobaculaceae;g__Subgroup_10;s__bacterium_enrichment_culture_clone_Anammox_2
Otu001597	5	1	4	k__Bacteria;p__Verrucomicrobia;c__Verrucomicrobiae;o__S-BQ2-57_soil_group;f__;g__;s__
Otu001603	9	4	1	k__Bacteria;p__Verrucomicrobia;c__Verrucomicrobiae
Otu001608	1	1	7	k__Bacteria;p__Chloroflexi;c__Anaerolineae;o__Caldilineales;f__Caldilineaceae;g__;s__
Otu001609	4	3	4	k__Bacteria;p__Verrucomicrobia;c__Verrucomicrobiae;o__Pedosphaerales;f__Pedosphaeraceae;g__;s__
Otu001611	1	5	5	k__Bacteria;p__Verrucomicrobia;c__Verrucomicrobiae;o__Verrucomicrobiales;f__Rubritaleaceae;g__Luteolibacter
Otu001612	2	11	1	k__Bacteria;p__Actinobacteria;c__Actinobacteria;o__PeM15;f__;g__;s__
Otu001617	6	3	3	k__Bacteria;p__Verrucomicrobia;c__Verrucomicrobiae;o__Pedosphaerales;f__Pedosphaeraceae;g__;s__
Otu001618	1	3	5	k__Bacteria;p__Proteobacteria;c__Gammaproteobacteria;o__Betaproteobacteriales;f__Nitrosomonadaceae;g__MND1;s__
Otu001619	3	1	6	k__Bacteria;p__Chloroflexi;c__Anaerolineae;o__Caldilineales;f__Caldilineaceae;g__;s__
Otu001621	3	1	6	k__Bacteria;p__Proteobacteria;c__Deltaproteobacteria;o__Sva0485;f__;g__;s__
Otu001622	2	3	5	k__Bacteria;p__Planctomycetes;c__Planctomycetacia;o__Pirellulales;f__Pirellulaceae;g__Pirellula;s__
Otu001623	3	5	4	k__Bacteria;p__Planctomycetes;c__Phycisphaerae;o__Tepidisphaerales;f__WD2101_soil_group;g__;s__
Otu001627	1	2	6	k__Bacteria;p__Actinobacteria;c__Thermoleophilia;o__Gaiellales;f__Gaiellaceae;g__Gaiella;s__
Otu001629	6	1	4	k__Bacteria;p__Planctomycetes;c__Phycisphaerae;o__Phycisphaerales;f__Phycisphaeraceae;g__SM1A02;s__
Otu001634	8	4	1	k__Bacteria;p__Planctomycetes;c__Planctomycetacia;o__Gemmatales;f__Gemmataceae
Otu001636	1	2	6	k__Bacteria;p__Chloroflexi;c__Anaerolineae;o__Ardenticatenales;f__;g__;s__
Otu001638	2	1	7	k__Bacteria;p__Chloroflexi;c__Anaerolineae;o__SJA-15;f__;g__;s__
Otu001639	1	4	5	k__Bacteria;p__Proteobacteria;c__Gammaproteobacteria;o__Pseudomonadales;f__Moraxellaceae;g__Acinetobacter
Otu001640	2	5	4	k__Bacteria;p__Verrucomicrobia;c__Verrucomicrobiae;o__Verrucomicrobiales;f__Rubritaleaceae;g__Luteolibacter
Otu001643	2	9	1	k__Bacteria;p__Firmicutes;c__Clostridia;o__Clostridiales;f__Clostridiaceae_1;g__Clostridium_sensu_stricto_3;s__
Otu001645	1	1	7	k__Bacteria;p__Verrucomicrobia;c__Verrucomicrobiae;o__Chthoniobacterales;f__Chthoniobacteraceae;g__;s__
Otu001648	2	2	6	k__Bacteria;p__Actinobacteria;c__Actinobacteria;o__Corynebacteriales;f__Mycobacteriaceae;g__Mycobacterium
Otu001649	1	5	4	k__Bacteria;p__Proteobacteria;c__Deltaproteobacteria;o__Sva0485;f__;g__;s__
Otu001650	6	4	1	k__Bacteria;p__Planctomycetes;c__Planctomycetacia;o__Isosphaerales;f__Isosphaeraceae;g__;s__
Otu001651	1	2	6	k__Bacteria;p__Planctomycetes;c__Planctomycetacia;o__Pirellulales;f__Pirellulaceae;g__Pir4_lineage
Otu001652	3	2	5	k__Bacteria;p__Proteobacteria;c__Alphaproteobacteria;o__Tistrellales;f__Geminicoccaceae;g__;s__
Otu001653	2	4	4	k__Bacteria;p__Chloroflexi;c__Anaerolineae;o__Anaerolineales;f__Anaerolineaceae;g__;s__
Otu001655	5	1	4	k__Bacteria;p__Proteobacteria;c__Alphaproteobacteria;o__Rhizobiales;f__Hyphomicrobiaceae;g__Pedomicrobium;s__
Otu001657	1	7	3	k__Bacteria;p__Planctomycetes;c__Planctomycetacia;o__Isosphaerales;f__Isosphaeraceae;g__;s__
Otu001662	2	1	6	k__Bacteria;p__Planctomycetes;c__Planctomycetacia;o__Pirellulales;f__Pirellulaceae;g__Pir2_lineage;s__
Otu001663	1	6	3	k__Bacteria;p__Proteobacteria;c__Alphaproteobacteria;o__Tistrellales;f__Geminicoccaceae;g__Candidatus_Alysiosphaera;s__
Otu001664	3	1	5	k__Bacteria;p__Planctomycetes;c__Planctomycetacia;o__Pirellulales;f__Pirellulaceae;g__;s__
Otu001665	2	2	5	k__Bacteria;p__Actinobacteria;c__Thermoleophilia;o__Solirubrobacterales;f__Solirubrobacteraceae;g__Solirubrobacter;s__
Otu001667	1	3	5	k__Bacteria;p__Actinobacteria;c__Thermoleophilia;o__Solirubrobacterales;f__67-14;g__;s__
Otu001668	1	8	2	k__Bacteria;p__Planctomycetes;c__Planctomycetacia;o__Pirellulales;f__Pirellulaceae;g__Pir3_lineage;s__
Otu001672	1	1	7	k__Bacteria;p__Proteobacteria;c__Alphaproteobacteria;o__Rhodospirillales;f__Rhodopirillaceae;g__Defluviicoccus;s__
Otu001675	5	3	2	k__Bacteria;p__Planctomycetes;c__Planctomycetacia;o__Isosphaerales;f__Isosphaeraceae;g__;s__
Otu001678	1	3	6	k__Bacteria;p__Verrucomicrobia;c__Verrucomicrobiae;o__Pedosphaerales;f__Pedosphaeraceae;g__;s__
Otu001687	1	2	6	k__Bacteria;p__Planctomycetes;c__Phycisphaerae;o__Phycisphaerales;f__Phycisphaeraceae;g__Urania-1B-19_marine_sediment_group;s__
Otu001689	2	4	4	k__Bacteria;p__Planctomycetes;c__Phycisphaerae;o__Tepidisphaerales;f__WD2101_soil_group;g__;s__
Otu001694	4	1	5	k__Bacteria;p__Planctomycetes;c__Planctomycetacia;o__Pirellulales;f__Pirellulaceae;g__;s__
Otu001697	2	1	6	k__Bacteria;p__Planctomycetes;c__Planctomycetacia;o__Pirellulales;f__Pirellulaceae
Otu001702	1	1	6	k__Bacteria;p__Proteobacteria;c__Alphaproteobacteria;o__Rhodospirillales;f__Rhodopirillaceae;g__Defluviicoccus;s__
Otu001704	2	1	5	k__Bacteria;p__Proteobacteria;c__Deltaproteobacteria;o__MBNT15;f__;g__;s__
Otu001706	2	5	3	k__Bacteria;p__Bacteroidetes;c__Bacteroidia;o__Bacteroidales;f__Bacteroidetes_vadinHA17;g__;s__
Otu001707	2	5	3	k__Bacteria;p__Proteobacteria;c__Alphaproteobacteria;o__Rhizobiales;f__Rhodomicrobiaceae;g__Rhodomicrobium;s__
Otu001711	6	4	2	k__Bacteria;p__Proteobacteria;c__Gammaproteobacteria;o__Competibacterales;f__Competibacteraceae;g__Candidatus_Competibacter;s__
Otu001713	5	2	3	k__Bacteria;p__Actinobacteria;c__Thermoleophilia;o__Solirubrobacterales;f__67-14;g__;s__
Otu001717	2	1	6	k__Bacteria;p__Verrucomicrobia;c__Verrucomicrobiae;o__Pedosphaerales;f__Pedosphaeraceae;g__;s__
Otu001718	5	2	3	k__Bacteria;p__Verrucomicrobia;c__Verrucomicrobiae;o__Pedosphaerales;f__Pedosphaeraceae;g__;s__
Otu001720	1	1	6	k__Bacteria;p__Chloroflexi;c__Anaerolineae;o__Caldilineales;f__Caldilineaceae
Otu001721	1	2	5	k__Bacteria;p__Acidobacteria;c__Acidobacteriia;o__Solibacterales;f__Solibacteraceae_Subgroup_3;g__Bryobacter;s__
Otu001726	1	1	6	k__Bacteria;p__Acidobacteria;c__Subgroup_6;o__Unknown_Order;f__Unknown_Family;g__Luteitalea
Otu001730	2	4	4	k__Bacteria;p__Verrucomicrobia;c__Verrucomicrobiae;o__Verrucomicrobiales;f__Rubritaleaceae;g__Luteolibacter;s__
Otu001738	6	3	2	k__Bacteria;p__Planctomycetes;c__Planctomycetacia;o__Isosphaerales;f__Isosphaeraceae;g__;s__
Otu001739	10	1	1	k__Bacteria;p__Planctomycetes;c__Planctomycetacia;o__Pirellulales;f__Pirellulaceae;g__;s__
Otu001740	1	1	6	k__Bacteria;p__Planctomycetes;c__Planctomycetacia;o__Gemmatales;f__Gemmataceae;g__;s__
Otu001741	2	5	3	k__Bacteria;p__Proteobacteria;c__Gammaproteobacteria;o__Betaproteobacteriales;f__Nitrosomonadaceae;g__mle1-7;s__
Otu001746	2	3	4	k__Bacteria;p__Proteobacteria;c__Deltaproteobacteria;o__NB1-j;f__;g__;s__
Otu001748	3	2	4	k__Bacteria;p__Planctomycetes;c__Planctomycetacia;o__Pirellulales;f__Pirellulaceae;g__;s__
Otu001750	1	6	3	k__Bacteria;p__Firmicutes;c__Clostridia;o__Clostridiales;f__Ruminococcaceae;g__Ruminococcaceae_UCG-002;s__
Otu001751	4	6	1	k__Bacteria;p__Acidobacteria;c__Subgroup_22;o__;f__;g__;s__
Otu001752	2	2	4	k__Bacteria;p__Proteobacteria;c__Gammaproteobacteria;o__JG36-GS-52;f__;g__;s__
Otu001753	1	1	6	k__Bacteria;p__Proteobacteria;c__Deltaproteobacteria;o__Syntrophobacterales;f__Syntrophobacteraceae;g__Syntrophobacter;s__
Otu001756	3	1	5	k__Bacteria;p__Acidobacteria;c__Thermoanaerobaculia;o__Thermoanaerobaculales;f__Thermoanaerobaculaceae;g__Subgroup_23;s__
Otu001757	5	1	3	k__Bacteria;p__Planctomycetes;c__Planctomycetacia;o__Pirellulales;f__Pirellulaceae;g__;s__
Otu001760	1	1	6	k__Bacteria;p__Acidobacteria;c__Acidobacteriia;o__Solibacterales;f__Solibacteraceae_Subgroup_3;g__Paludibaculum;s__
Otu001765	4	2	4	k__Bacteria;p__Latescibacteria;c__Latescibacteria;o__Latescibacterales;f__Latescibacteraceae
Otu001769	1	3	5	k__Bacteria;p__Proteobacteria;c__Gammaproteobacteria
Otu001771	6	1	3	k__Bacteria;p__Planctomycetes;c__Planctomycetacia;o__Pirellulales;f__Pirellulaceae;g__Candidatus_Anammoximicrobium;s__
Otu001776	2	1	5	k__Bacteria;p__Proteobacteria;c__Gammaproteobacteria;o__Competibacterales;f__Competibacteraceae;g__Candidatus_Competibacter;s__
Otu001780	7	2	1	k__Bacteria;p__Proteobacteria;c__Gammaproteobacteria;o__Competibacterales;f__Competibacteraceae;g__Candidatus_Competibacter;s__
Otu001781	1	1	6	k__Bacteria
Otu001785	1	9	1	k__Bacteria;p__Proteobacteria;c__Gammaproteobacteria;o__Pseudomonadales;f__Pseudomonadaceae;g__Pseudomonas
Otu001786	5	4	2	k__Bacteria;p__Actinobacteria;c__Thermoleophilia;o__Solirubrobacterales;f__Solirubrobacteraceae;g__Conexibacter;s__
Otu001794	6	2	2	k__Bacteria;p__Proteobacteria;c__Gammaproteobacteria;o__Aeromonadales;f__Aeromonadaceae;g__Aeromonas
Otu001797	5	4	2	k__Bacteria;p__Proteobacteria;c__Gammaproteobacteria;o__Aeromonadales
Otu001803	3	1	4	k__Bacteria;p__Chloroflexi;c__Anaerolineae;o__RBG-13-54-9;f__;g__;s__
Otu001811	2	3	4	k__Bacteria;p__Chloroflexi;c__Anaerolineae;o__Caldilineales;f__Caldilineaceae
Otu001819	2	3	4	k__Bacteria;p__Planctomycetes;c__Phycisphaerae;o__Tepidisphaerales;f__WD2101_soil_group;g__;s__
Otu001821	1	2	5	k__Bacteria;p__Proteobacteria;c__Gammaproteobacteria;o__Betaproteobacteriales;f__SC-I-84;g__;s__
Otu001832	2	3	4	k__Bacteria;p__Planctomycetes;c__Planctomycetacia;o__Pirellulales;f__Pirellulaceae;g__Candidatus_Anammoximicrobium;s__
Otu001838	1	7	2	k__Bacteria;p__Planctomycetes;c__Planctomycetacia;o__Isosphaerales;f__Isosphaeraceae;g__;s__
Otu001849	2	5	2	k__Bacteria;p__Verrucomicrobia;c__Verrucomicrobiae;o__Verrucomicrobiales;f__Rubritaleaceae;g__Luteolibacter
Otu001853	3	1	4	k__Bacteria;p__Planctomycetes;c__Planctomycetacia;o__Planctomycetales;f__Rubinisphaeraceae;g__SH-PL14;s__
Otu001857	1	3	4	k__Bacteria;p__Acidobacteria;c__Subgroup_6
Otu001860	3	1	4	k__Bacteria;p__Proteobacteria;c__Gammaproteobacteria
Otu001861	5	1	3	k__Bacteria
Otu001865	1	4	4	k__Bacteria;p__Proteobacteria;c__Deltaproteobacteria;o__Myxococcales;f__P3OB-42;g__;s__
Otu001867	2	1	5	k__Bacteria;p__Proteobacteria;c__Gammaproteobacteria;o__Betaproteobacteriales;f__Rhodocyclaceae;g__;s__
Otu001869	8	1	1	k__Bacteria;p__Planctomycetes;c__Planctomycetacia;o__Pirellulales;f__Pirellulaceae
Otu001871	3	5	2	k__Bacteria;p__Planctomycetes;c__Planctomycetacia;o__Gemmatales;f__Gemmataceae
Otu001875	3	2	3	k__Bacteria;p__Proteobacteria;c__Alphaproteobacteria;o__Rhizobiales;f__Rhizobiaceae
Otu001878	6	2	2	k__Bacteria;p__Verrucomicrobia;c__Verrucomicrobiae;o__Pedosphaerales;f__Pedosphaeraceae;g__;s__
Otu001880	6	3	1	k__Bacteria;p__Omnitrophicaeota;c__Omnitrophia;o__Omnitrophales;f__Omnitrophaceae;g__Candidatus_Omnitrophus;s__Omnitrophica_bacterium_RIFOXYB12_FULL_50_7
Otu001884	1	1	5	k__Bacteria;p__Verrucomicrobia;c__Verrucomicrobiae;o__Pedosphaerales;f__Pedosphaeraceae;g__;s__
Otu001887	1	1	5	k__Bacteria;p__Verrucomicrobia;c__Verrucomicrobiae;o__Chthoniobacterales;f__Chthoniobacteraceae
Otu001892	2	3	3	k__Bacteria;p__Bacteroidetes;c__Bacteroidia;o__Sphingobacteriales;f__Lentimicrobiaceae;g__;s__
Otu001895	1	2	5	k__Bacteria;p__Actinobacteria;c__Thermoleophilia;o__Gaiellales;f__Gaiellaceae;g__Gaiella;s__
Otu001898	2	2	4	k__Bacteria;p__Verrucomicrobia;c__Verrucomicrobiae;o__Pedosphaerales;f__Pedosphaeraceae;g__;s__
Otu001903	4	3	2	k__Bacteria;p__Planctomycetes;c__Planctomycetacia;o__Pirellulales;f__Pirellulaceae;g__Pirellula;s__
Otu001907	2	1	4	k__Bacteria;p__Planctomycetes;c__Planctomycetacia;o__Pirellulales;f__Pirellulaceae
Otu001914	3	5	1	k__Bacteria;p__Proteobacteria;c__Alphaproteobacteria;o__Rhodospirillales;f__Rhodopirillaceae;g__Defluviicoccus;s__
Otu001915	1	1	5	k__Bacteria;p__Proteobacteria;c__Gammaproteobacteria;o__JG36-GS-52;f__;g__;s__
Otu001921	3	3	2	k__Bacteria;p__Actinobacteria;c__Thermoleophilia;o__Gaiellales;f__;g__;s__
Otu001922	1	5	2	k__Bacteria;p__Chloroflexi;c__Anaerolineae;o__SJA-15;f__;g__;s__
Otu001928	2	3	3	k__Bacteria;p__Verrucomicrobia;c__Verrucomicrobiae;o__Pedosphaerales;f__Pedosphaeraceae;g__ADurbBin063-1;s__
Otu001932	2	1	5	k__Bacteria
Otu001935	2	1	4	k__Bacteria;p__Proteobacteria;c__Gammaproteobacteria;o__Betaproteobacteriales;f__SC-I-84;g__;s__
Otu001937	2	4	2	k__Bacteria;p__Acidobacteria;c__Acidobacteriia;o__Solibacterales;f__Solibacteraceae_Subgroup_3
Otu001938	2	4	2	k__Bacteria;p__Verrucomicrobia;c__Verrucomicrobiae;o__Verrucomicrobiales;f__Rubritaleaceae;g__Luteolibacter
Otu001943	3	6	1	k__Bacteria;p__Proteobacteria;c__Alphaproteobacteria;o__Acetobacterales;f__Acetobacteraceae
Otu001945	4	4	1	k__Bacteria;p__Proteobacteria;c__Alphaproteobacteria;o__Acetobacterales;f__Elioraeaceae;g__Elioraea
Otu001950	5	1	3	k__Bacteria;p__Verrucomicrobia;c__Verrucomicrobiae;o__Pedosphaerales;f__Pedosphaeraceae;g__;s__
Otu001954	1	2	4	k__Bacteria;p__Planctomycetes;c__Planctomycetacia;o__Gemmatales;f__Gemmataceae;g__;s__
Otu001959	1	2	4	k__Bacteria;p__Verrucomicrobia;c__Verrucomicrobiae;o__Verrucomicrobiales;f__Rubritaleaceae;g__Luteolibacter
Otu001969	1	6	2	k__Bacteria;p__Proteobacteria;c__Gammaproteobacteria;o__Competibacterales;f__Competibacteraceae;g__Candidatus_Competibacter;s__
Otu001972	3	3	2	k__Bacteria;p__Proteobacteria;c__Gammaproteobacteria;o__Nitrosococcales;f__Nitrosococcaceae;g__CI75cm212;s__
Otu001973	1	4	3	k__Bacteria;p__Verrucomicrobia;c__Verrucomicrobiae;o__Verrucomicrobiales;f__Rubritaleaceae;g__Luteolibacter
Otu001974	4	3	1	k__Bacteria;p__Planctomycetes;c__Planctomycetacia;o__Pirellulales;f__Pirellulaceae;g__Pir2_lineage;s__
Otu001980	1	4	3	k__Bacteria;p__Planctomycetes;c__Planctomycetacia;o__Pirellulales;f__Pirellulaceae;g__Pirellula;s__
Otu001985	2	2	3	k__Bacteria;p__Proteobacteria;c__Gammaproteobacteria;o__Methylococcales;f__Methylococcaceae;g__Methyloparacoccus;s__
Otu001993	3	1	3	k__Bacteria;p__Cyanobacteria;c__Oxyphotobacteria;o__Synechococcales;f__Cyanobiaceae;g__Cyanobium_PCC-6307;s__
Otu001994	3	3	2	k__Bacteria;p__Proteobacteria;c__Gammaproteobacteria;o__Pseudomonadales;f__Pseudomonadaceae;g__Pseudomonas
Otu001996	3	2	2	k__Bacteria;p__Planctomycetes;c__Planctomycetacia;o__Pirellulales;f__Pirellulaceae;g__Pirellula
Otu002001	3	1	4	k__Bacteria;p__Proteobacteria;c__Deltaproteobacteria;o__Desulfarculales;f__Desulfarculaceae;g__Desulfatiglans;s__
Otu002006	4	2	2	k__Bacteria;p__Actinobacteria;c__Acidimicrobiia
Otu002011	4	3	1	k__Bacteria;p__Planctomycetes;c__Phycisphaerae;o__Phycisphaerales;f__Phycisphaeraceae;g__CL500-3;s__
Otu002016	2	1	4	k__Bacteria;p__Rokubacteria;c__NC10;o__Rokubacteriales;f__;g__;s__
Otu002017	1	4	3	k__Bacteria;p__Proteobacteria;c__Deltaproteobacteria;o__Syntrophobacterales;f__Syntrophaceae;g__Desulfobacca;s__
Otu002018	2	1	4	k__Bacteria;p__Proteobacteria;c__Deltaproteobacteria;o__Sva0485;f__;g__;s__
Otu002027	1	1	4	k__Bacteria;p__Planctomycetes;c__Planctomycetacia;o__Gemmatales;f__Gemmataceae;g__Gemmata;s__
Otu002028	1	1	5	k__Bacteria;p__Proteobacteria;c__Deltaproteobacteria;o__Desulfarculales;f__Desulfarculaceae;g__;s__
Otu002038	6	1	1	k__Bacteria;p__Verrucomicrobia;c__Verrucomicrobiae;o__Pedosphaerales;f__Pedosphaeraceae;g__ADurbBin063-1;s__
Otu002040	1	3	3	k__Bacteria;p__Chloroflexi;c__Anaerolineae;o__Caldilineales;f__Caldilineaceae
Otu002041	1	1	4	k__Bacteria;p__Proteobacteria;c__Gammaproteobacteria;o__Betaproteobacteriales;f__Rhodocyclaceae
Otu002051	5	1	2	k__Bacteria;p__Actinobacteria;c__Actinobacteria;o__Propionibacteriales;f__Nocardioidaceae;g__Marmoricola;s__
Otu002061	1	1	4	k__Bacteria;p__Proteobacteria;c__Gammaproteobacteria;o__SZB30;f__;g__;s__
Otu002078	2	1	3	k__Bacteria;p__Actinobacteria;c__Thermoleophilia;o__Gaiellales;f__;g__;s__
Otu002080	6	1	1	k__Bacteria;p__Planctomycetes;c__Planctomycetacia;o__Gemmatales;f__Gemmataceae;g__Gemmata;s__
Otu002083	1	4	2	k__Bacteria;p__Verrucomicrobia;c__Verrucomicrobiae;o__Pedosphaerales;f__Pedosphaeraceae
Otu002086	1	2	4	k__Bacteria;p__Proteobacteria;c__Deltaproteobacteria;o__Desulfuromonadales;f__Geobacteraceae;g__Geobacter;s__
Otu002087	2	1	3	k__Bacteria;p__Bacteroidetes;c__Ignavibacteria;o__Kryptoniales;f__BSV26;g__;s__
Otu002096	2	4	1	k__Bacteria;p__Verrucomicrobia;c__Verrucomicrobiae;o__Verrucomicrobiales;f__Rubritaleaceae;g__Luteolibacter;s__
Otu002101	5	1	2	k__Bacteria;p__Planctomycetes;c__Planctomycetacia;o__Gemmatales;f__Gemmataceae;g__Gemmata;s__
Otu002105	1	3	3	k__Bacteria;p__Proteobacteria;c__Deltaproteobacteria;o__Myxococcales;f__Polyangiaceae;g__Pajaroellobacter;s__
Otu002107	6	1	1	k__Bacteria;p__Verrucomicrobia;c__Verrucomicrobiae;o__Chthoniobacterales;f__Chthoniobacteraceae;g__Chthoniobacter;s__
Otu002116	1	3	3	k__Bacteria;p__Proteobacteria;c__Deltaproteobacteria;o__Syntrophobacterales;f__Syntrophobacteraceae
Otu002120	5	2	1	k__Bacteria;p__Planctomycetes;c__Planctomycetacia;o__Isosphaerales;f__Isosphaeraceae;g__;s__
Otu002121	3	3	1	k__Bacteria;p__Planctomycetes;c__OM190;o__;f__;g__;s__
Otu002122	2	2	3	k__Bacteria;p__Verrucomicrobia;c__Verrucomicrobiae;o__Pedosphaerales;f__Pedosphaeraceae
Otu002123	3	3	2	k__Bacteria;p__Planctomycetes;c__Planctomycetacia;o__Gemmatales;f__Gemmataceae;g__;s__
Otu002124	3	3	2	k__Bacteria;p__Planctomycetes;c__Phycisphaerae;o__Tepidisphaerales;f__WD2101_soil_group
Otu002128	4	1	2	k__Bacteria;p__Proteobacteria;c__Deltaproteobacteria
Otu002132	6	1	1	k__Bacteria;p__Planctomycetes;c__Pla4_lineage;o__;f__;g__;s__
Otu002146	2	3	2	k__Bacteria;p__Planctomycetes;c__Planctomycetacia;o__Gemmatales;f__Gemmataceae;g__Gemmata;s__
Otu002148	3	3	2	k__Bacteria;p__Gemmatimonadetes;c__Gemmatimonadetes;o__Gemmatimonadales;f__Gemmatimonadaceae
Otu002153	4	2	1	k__Bacteria;p__Planctomycetes;c__Planctomycetacia;o__Pirellulales;f__Pirellulaceae;g__Pirellula;s__
Otu002157	1	5	1	k__Bacteria;p__Planctomycetes;c__Phycisphaerae;o__Phycisphaerales;f__Phycisphaeraceae;g__SM1A02;s__
Otu002159	3	1	3	k__Bacteria;p__Planctomycetes;c__OM190
Otu002160	3	1	2	k__Bacteria;p__Planctomycetes;c__OM190;o__;f__;g__;s__
Otu002161	2	1	3	k__Bacteria;p__Proteobacteria;c__Gammaproteobacteria;o__Betaproteobacteriales;f__TRA3-20;g__;s__
Otu002164	3	1	3	k__Bacteria;p__Omnitrophicaeota;c__Omnitrophia;o__Omnitrophales;f__Omnitrophaceae;g__Candidatus_Omnitrophus
Otu002167	2	1	4	k__Bacteria;p__Bacteroidetes;c__Bacteroidia;o__Flavobacteriales;f__Flavobacteriaceae;g__Flavobacterium
Otu002169	3	1	3	k__Bacteria;p__Planctomycetes;c__Pla3_lineage;o__;f__;g__;s__
Otu002170	1	1	4	k__Bacteria;p__Verrucomicrobia;c__Verrucomicrobiae;o__Chthoniobacterales;f__Chthoniobacteraceae;g__Chthoniobacter;s__
Otu002177	1	2	3	k__Bacteria;p__Verrucomicrobia;c__Verrucomicrobiae;o__Chthoniobacterales;f__Chthoniobacteraceae;g__Chthoniobacter;s__
Otu002181	4	3	1	k__Bacteria;p__Proteobacteria;c__Gammaproteobacteria;o__Betaproteobacteriales;f__SC-I-84;g__;s__
Otu002183	2	1	3	k__Bacteria;p__Proteobacteria;c__Gammaproteobacteria;o__Betaproteobacteriales;f__SC-I-84
Otu002184	4	3	1	k__Bacteria;p__Planctomycetes;c__Phycisphaerae;o__Phycisphaerales;f__Phycisphaeraceae;g__SM1A02;s__
Otu002208	1	1	4	k__Bacteria;p__Proteobacteria;c__Deltaproteobacteria;o__MBNT15;f__;g__;s__
Otu002210	3	4	1	k__Bacteria;p__Planctomycetes;c__Planctomycetacia;o__Isosphaerales;f__Isosphaeraceae;g__;s__
Otu002217	3	2	2	k__Bacteria;p__Planctomycetes;c__Planctomycetacia;o__Pirellulales;f__Pirellulaceae
Otu002223	4	1	2	k__Bacteria;p__Planctomycetes;c__Planctomycetacia;o__Gemmatales;f__Gemmataceae;g__;s__
Otu002231	1	1	4	k__Bacteria;p__Planctomycetes;c__Planctomycetacia;o__Gemmatales;f__Gemmataceae;g__;s__
Otu002241	1	1	4	k__Bacteria;p__Planctomycetes;c__Phycisphaerae;o__Tepidisphaerales;f__WD2101_soil_group
Otu002242	1	5	1	k__Bacteria;p__Bacteroidetes;c__Bacteroidia;o__Bacteroidales;f__Bacteroidaceae;g__Bacteroides;s__Bacteroides_stercoris_ATCC_43183
Otu002246	5	1	1	k__Bacteria;p__Planctomycetes;c__Planctomycetacia;o__Pirellulales;f__Pirellulaceae;g__;s__
Otu002250	2	2	3	k__Bacteria;p__Planctomycetes;c__Planctomycetacia;o__Pirellulales;f__Pirellulaceae;g__;s__
Otu002252	1	2	3	k__Bacteria;p__Proteobacteria;c__Gammaproteobacteria;o__Cellvibrionales;f__Spongiibacteraceae;g__BD1-7_clade;s__
Otu002255	5	2	1	k__Bacteria;p__Planctomycetes;c__Phycisphaerae;o__Phycisphaerales;f__Phycisphaeraceae;g__CL500-3;s__
Otu002261	1	1	4	k__Bacteria;p__Proteobacteria;c__Gammaproteobacteria;o__Betaproteobacteriales;f__Nitrosomonadaceae;g__MND1;s__
Otu002268	2	3	1	k__Bacteria;p__Verrucomicrobia;c__Verrucomicrobiae;o__Chthoniobacterales;f__Chthoniobacteraceae;g__Chthoniobacter;s__
Otu002280	3	1	3	k__Bacteria;p__Planctomycetes;c__Phycisphaerae;o__Tepidisphaerales;f__WD2101_soil_group;g__;s__
Otu002281	4	1	1	k__Bacteria;p__Planctomycetes;c__OM190;o__;f__;g__;s__
Otu002288	1	6	1	k__Bacteria;p__Proteobacteria;c__Gammaproteobacteria;o__Methylococcales;f__Methylococcaceae
Otu002290	4	2	1	k__Bacteria;p__Actinobacteria;c__Acidimicrobiia;o__Microtrichales;f__Microtrichaceae;g__IMCC26207;s__
Otu002294	2	1	3	k__Bacteria;p__Planctomycetes;c__Planctomycetacia;o__Pirellulales;f__Pirellulaceae
Otu002295	2	1	3	k__Bacteria;p__Acidobacteria;c__Subgroup_22;o__;f__;g__;s__
Otu002302	3	3	1	k__Bacteria;p__Proteobacteria;c__Gammaproteobacteria;o__Methylococcales;f__Methylococcaceae;g__Candidatus_Methylospira;s__
Otu002309	4	2	1	k__Bacteria;p__Firmicutes;c__Clostridia;o__Clostridiales;f__Family_XIII;g__Anaerovorax;s__
Otu002311	3	1	2	k__Bacteria;p__Proteobacteria;c__Deltaproteobacteria;o__Syntrophobacterales;f__Syntrophaceae;g__Desulfobacca
Otu002315	1	1	3	k__Bacteria;p__Verrucomicrobia;c__Verrucomicrobiae;o__Verrucomicrobiales;f__Rubritaleaceae;g__Luteolibacter
Otu002316	5	1	1	k__Bacteria;p__Planctomycetes;c__Phycisphaerae;o__Pla1_lineage;f__;g__;s__
Otu002321	3	1	2	k__Bacteria;p__Verrucomicrobia;c__Verrucomicrobiae;o__Pedosphaerales;f__Pedosphaeraceae
Otu002323	1	2	3	k__Bacteria;p__Planctomycetes;c__Planctomycetacia;o__Gemmatales;f__Gemmataceae;g__;s__
Otu002326	1	2	3	k__Bacteria;p__Omnitrophicaeota;c__Omnitrophia;o__Omnitrophales;f__Omnitrophaceae;g__Candidatus_Omnitrophus;s__
Otu002327	3	2	1	k__Bacteria;p__Gemmatimonadetes;c__Gemmatimonadetes;o__Gemmatimonadales;f__Gemmatimonadaceae;g__;s__
Otu002341	2	2	2	k__Bacteria;p__Planctomycetes;c__Planctomycetacia;o__Pirellulales;f__Pirellulaceae
Otu002367	2	1	2	k__Bacteria;p__Proteobacteria;c__Deltaproteobacteria;o__Sva0485;f__;g__;s__
Otu002389	3	2	1	k__Bacteria;p__Verrucomicrobia;c__Verrucomicrobiae;o__Pedosphaerales;f__Pedosphaeraceae
Otu002390	3	2	1	k__Bacteria;p__Verrucomicrobia;c__Verrucomicrobiae;o__Pedosphaerales;f__Pedosphaeraceae
Otu002403	2	2	2	k__Bacteria;p__Proteobacteria;c__Gammaproteobacteria;o__Betaproteobacteriales;f__Burkholderiaceae;g__Rivibacter;s__Burkholderiales_bacterium
Otu002404	3	2	1	k__Bacteria;p__Proteobacteria;c__Gammaproteobacteria;o__Betaproteobacteriales;f__Burkholderiaceae
Otu002415	1	2	3	k__Bacteria;p__Actinobacteria;c__Actinobacteria;o__Propionibacteriales;f__Nocardioidaceae;g__Nocardioides
Otu002416	2	1	3	k__Bacteria;p__Planctomycetes;c__Planctomycetacia;o__Gemmatales;f__Gemmataceae;g__;s__
Otu002421	1	2	2	k__Bacteria;p__Planctomycetes;c__Planctomycetacia;o__Pirellulales;f__Pirellulaceae;g__;s__
Otu002425	3	2	1	k__Bacteria;p__Proteobacteria;c__Gammaproteobacteria;o__Betaproteobacteriales;f__SC-I-84;g__;s__
Otu002429	2	3	1	k__Bacteria;p__Bacteroidetes;c__Bacteroidia;o__Flavobacteriales;f__Flavobacteriaceae;g__Flavobacterium
Otu002430	1	3	2	k__Bacteria;p__Proteobacteria;c__Deltaproteobacteria;o__Desulfarculales;f__Desulfarculaceae;g__Desulfatiglans
Otu002433	3	1	1	k__Bacteria;p__Firmicutes;c__Clostridia;o__Clostridiales;f__Lachnospiraceae;g__Roseburia;s__
Otu002434	1	1	3	k__Bacteria;p__Proteobacteria;c__Deltaproteobacteria;o__Desulfuromonadales;f__Geobacteraceae;g__Geobacter
Otu002446	1	1	3	k__Bacteria;p__Proteobacteria;c__Alphaproteobacteria;o__Rhodospirillales;f__Rhodopirillaceae;g__Defluviicoccus;s__
Otu002448	2	1	2	k__Bacteria;p__Verrucomicrobia;c__Verrucomicrobiae;o__Verrucomicrobiales;f__Verrucomicrobiaceae;g__Roseimicrobium;s__
Otu002454	1	2	2	k__Bacteria;p__Proteobacteria;c__Gammaproteobacteria;o__CCM19a;f__;g__;s__
Otu002455	1	3	2	k__Bacteria;p__Bacteroidetes;c__Bacteroidia;o__Sphingobacteriales;f__envOPS_17;g__;s__
Otu002456	1	1	3	k__Bacteria;p__Proteobacteria;c__Alphaproteobacteria;o__Reyranellales;f__Reyranellaceae;g__;s__
Otu002460	3	1	1	k__Bacteria;p__Bacteroidetes;c__Bacteroidia;o__Bacteroidetes_VC21_Bac22;f__;g__;s__
Otu002461	1	1	3	k__Bacteria;p__Chloroflexi;c__Anaerolineae;o__Caldilineales;f__Caldilineaceae;g__Caldilinea;s__Caldilinea_aerophila_DSM_14535_=_NBRC_104270
Otu002464	4	1	1	k__Bacteria;p__Firmicutes;c__Clostridia;o__Clostridiales;f__Lachnospiraceae
Otu002472	1	2	2	k__Bacteria;p__Verrucomicrobia;c__Verrucomicrobiae;o__Pedosphaerales;f__Pedosphaeraceae
Otu002476	2	2	1	k__Bacteria;p__Planctomycetes;c__Planctomycetacia;o__Pirellulales;f__Pirellulaceae
Otu002493	1	1	3	k__Bacteria;p__Proteobacteria;c__Deltaproteobacteria;o__Syntrophobacterales;f__Syntrophaceae;g__Desulfobacca;s__
Otu002494	1	4	1	k__Bacteria;p__Planctomycetes;c__OM190;o__;f__;g__;s__
Otu002500	3	1	1	k__Bacteria;p__Verrucomicrobia;c__Verrucomicrobiae;o__Pedosphaerales;f__Pedosphaeraceae;g__;s__
Otu002501	1	4	1	k__Bacteria;p__Planctomycetes;c__Planctomycetacia;o__Pirellulales;f__Pirellulaceae;g__Candidatus_Anammoximicrobium;s__
Otu002505	3	1	2	k__Bacteria;p__Planctomycetes;c__Phycisphaerae;o__Tepidisphaerales;f__WD2101_soil_group;g__;s__
Otu002507	2	1	2	k__Bacteria;p__Planctomycetes;c__Planctomycetacia;o__Pirellulales;f__Pirellulaceae;g__Candidatus_Anammoximicrobium;s__
Otu002531	1	2	2	k__Bacteria;p__Bacteroidetes;c__Bacteroidia;o__Bacteroidales;f__Bacteroidaceae;g__Bacteroides
Otu002535	2	1	2	k__Bacteria;p__Planctomycetes;c__Phycisphaerae;o__mle1-8;f__;g__;s__
Otu002536	4	1	1	k__Bacteria;p__Proteobacteria;c__Gammaproteobacteria;o__Competibacterales;f__Competibacteraceae;g__Candidatus_Competibacter;s__
Otu002537	2	1	2	k__Bacteria;p__Planctomycetes;c__Planctomycetacia;o__Pirellulales;f__Pirellulaceae;g__;s__
Otu002541	1	1	3	k__Bacteria;p__Verrucomicrobia;c__Verrucomicrobiae;o__Chthoniobacterales;f__Terrimicrobiaceae;g__FukuN18_freshwater_group;s__
Otu002542	2	2	1	k__Bacteria;p__Actinobacteria;c__Actinobacteria;o__Micrococcales;f__Cellulomonadaceae;g__Cellulomonas;s__
Otu002575	1	3	1	k__Bacteria;p__Proteobacteria;c__Alphaproteobacteria;o__Rhizobiales;f__Hyphomicrobiaceae;g__Hyphomicrobium;s__
Otu002576	3	1	1	k__Bacteria;p__Proteobacteria;c__Alphaproteobacteria
Otu002582	3	1	1	k__Bacteria;p__Bacteroidetes;c__Bacteroidia;o__Cytophagales;f__Cyclobacteriaceae;g__;s__
Otu002602	1	2	2	k__Bacteria;p__Proteobacteria;c__Gammaproteobacteria;o__Betaproteobacteriales;f__TRA3-20;g__;s__
Otu002612	2	1	2	k__Bacteria;p__Actinobacteria;c__Acidimicrobiia;o__Microtrichales;f__Ilumatobacteraceae;g__;s__
Otu002619	2	2	1	k__Bacteria;p__Planctomycetes;c__Planctomycetacia;o__Gemmatales;f__Gemmataceae;g__;s__
Otu002621	2	2	1	k__Bacteria;p__Proteobacteria;c__Gammaproteobacteria;o__Steroidobacterales;f__Steroidobacteraceae;g__;s__
Otu002622	1	1	2	k__Bacteria;p__Verrucomicrobia;c__Verrucomicrobiae;o__Pedosphaerales;f__Pedosphaeraceae;g__;s__
Otu002629	1	2	2	k__Bacteria;p__Planctomycetes;c__Planctomycetacia;o__Isosphaerales;f__Isosphaeraceae
Otu002646	2	1	2	k__Bacteria;p__Planctomycetes;c__Planctomycetacia;o__Gemmatales;f__Gemmataceae;g__;s__
Otu002648	1	2	2	k__Bacteria;p__Verrucomicrobia;c__Verrucomicrobiae;o__Pedosphaerales;f__Pedosphaeraceae;g__;s__
Otu002656	2	1	2	k__Bacteria;p__Proteobacteria;c__Gammaproteobacteria
Otu002669	3	1	1	k__Bacteria;p__Proteobacteria;c__Gammaproteobacteria;o__KI89A_clade;f__;g__;s__
Otu002677	3	1	1	k__Bacteria;p__Proteobacteria;c__Gammaproteobacteria;o__Betaproteobacteriales;f__Burkholderiaceae
Otu002680	2	2	1	k__Bacteria;p__Verrucomicrobia;c__Verrucomicrobiae;o__Pedosphaerales;f__Pedosphaeraceae;g__;s__
Otu002681	3	1	1	k__Bacteria;p__Planctomycetes;c__Phycisphaerae;o__Tepidisphaerales;f__WD2101_soil_group;g__;s__
Otu002682	3	1	1	k__Bacteria;p__Planctomycetes;c__Planctomycetacia;o__Pirellulales;f__Pirellulaceae;g__Pirellula;s__
Otu002704	1	1	2	k__Bacteria;p__Actinobacteria;c__MB-A2-108;o__;f__;g__;s__
Otu002709	4	1	1	k__Bacteria;p__Planctomycetes;c__Planctomycetacia;o__Pirellulales;f__Pirellulaceae
Otu002711	2	1	1	k__Bacteria;p__Verrucomicrobia;c__Verrucomicrobiae;o__Verrucomicrobiales;f__Rubritaleaceae;g__Luteolibacter
Otu002712	4	1	1	k__Bacteria;p__Planctomycetes;c__Planctomycetacia;o__Pirellulales;f__Pirellulaceae
Otu002719	1	2	2	k__Bacteria;p__Proteobacteria;c__Deltaproteobacteria;o__Desulfuromonadales
Otu002725	1	1	2	k__Bacteria;p__Planctomycetes;c__Planctomycetacia;o__Pirellulales;f__Pirellulaceae
Otu002737	1	2	1	k__Bacteria;p__Verrucomicrobia;c__Verrucomicrobiae;o__Verrucomicrobiales;f__Rubritaleaceae;g__Luteolibacter
Otu002739	1	2	1	k__Bacteria;p__Planctomycetes;c__Planctomycetacia;o__Pirellulales;f__Pirellulaceae
Otu002747	1	2	1	k__Bacteria;p__Planctomycetes;c__Planctomycetacia;o__Gemmatales;f__Gemmataceae;g__Gemmata;s__
Otu002748	3	1	1	k__Bacteria;p__Verrucomicrobia;c__Verrucomicrobiae;o__Pedosphaerales;f__Pedosphaeraceae;g__;s__
Otu002754	1	1	2	k__Bacteria;p__Proteobacteria;c__Deltaproteobacteria;o__Syntrophobacterales;f__Syntrophobacteraceae;g__Syntrophobacter;s__
Otu002759	3	1	1	k__Bacteria;p__Proteobacteria;c__Gammaproteobacteria;o__Cellvibrionales;f__Halieaceae;g__OM60NOR5_clade;s__
Otu002760	1	1	2	k__Bacteria;p__Planctomycetes;c__Phycisphaerae;o__Tepidisphaerales;f__WD2101_soil_group;g__;s__
Otu002780	1	2	2	k__Bacteria;p__Bacteroidetes;c__Bacteroidia;o__Cytophagales;f__Microscillaceae;g__OLB12;s__
Otu002788	2	1	1	k__Bacteria;p__Proteobacteria;c__Gammaproteobacteria
Otu002796	2	1	1	k__Bacteria;p__Verrucomicrobia;c__Verrucomicrobiae;o__Verrucomicrobiales;f__Rubritaleaceae;g__Luteolibacter
Otu002797	1	3	1	k__Bacteria;p__Planctomycetes;c__OM190;o__;f__;g__;s__
Otu002805	1	1	2	k__Bacteria;p__Planctomycetes;c__OM190;o__;f__;g__;s__
Otu002809	1	3	1	k__Bacteria;p__Proteobacteria;c__Gammaproteobacteria;o__Methylococcales;f__Methylococcaceae;g__Candidatus_Methylospira;s__
Otu002822	1	3	1	k__Bacteria;p__Proteobacteria;c__Gammaproteobacteria;o__Methylococcales;f__Methylococcaceae;g__Methyloparacoccus;s__
Otu002823	1	1	2	k__Bacteria;p__Proteobacteria;c__Gammaproteobacteria
Otu002840	2	1	1	k__Bacteria;p__Chloroflexi;c__Anaerolineae;o__Caldilineales;f__Caldilineaceae;g__;s__
Otu002842	1	1	1	k__Bacteria;p__Planctomycetes;c__Phycisphaerae;o__Phycisphaerales;f__Phycisphaeraceae;g__SM1A02
Otu002847	2	1	1	k__Bacteria;p__Verrucomicrobia;c__Verrucomicrobiae;o__Pedosphaerales;f__Pedosphaeraceae
Otu002882	1	3	1	k__Bacteria;p__Verrucomicrobia;c__Verrucomicrobiae;o__Verrucomicrobiales;f__Rubritaleaceae;g__Luteolibacter
Otu002883	1	2	1	k__Bacteria;p__Proteobacteria;c__Alphaproteobacteria;o__Tistrellales;f__Geminicoccaceae;g__Candidatus_Alysiosphaera;s__
Otu002890	2	2	1	k__Bacteria;p__Verrucomicrobia;c__Verrucomicrobiae;o__Chthoniobacterales;f__Chthoniobacteraceae
Otu002905	2	1	1	k__Bacteria;p__Proteobacteria;c__Alphaproteobacteria;o__Rhodospirillales;f__Rhodopirillaceae;g__Defluviicoccus;s__
Otu002915	2	2	1	k__Bacteria;p__Verrucomicrobia;c__Verrucomicrobiae;o__Opitutales;f__Opitutaceae
Otu002919	1	3	1	k__Bacteria;p__Actinobacteria;c__Actinobacteria
Otu002934	1	1	2	k__Bacteria;p__Planctomycetes;c__OM190
Otu002948	1	2	1	k__Bacteria;p__Proteobacteria;c__Gammaproteobacteria;o__Pseudomonadales;f__Pseudomonadaceae;g__Pseudomonas
Otu002964	1	2	1	k__Bacteria;p__Proteobacteria;c__Deltaproteobacteria;o__Myxococcales
Otu002973	1	1	2	k__Bacteria;p__Chloroflexi;c__Anaerolineae;o__Caldilineales;f__Caldilineaceae
Otu002994	2	1	1	k__Bacteria;p__Proteobacteria;c__Deltaproteobacteria;o__Oligoflexales;f__Oligoflexaceae;g__Silvanigrella
Otu002999	2	2	1	k__Bacteria;p__Planctomycetes;c__OM190;o__;f__;g__;s__
Otu003006	1	2	1	k__Bacteria;p__Planctomycetes;c__Phycisphaerae;o__Tepidisphaerales;f__WD2101_soil_group
Otu003026	1	2	1	k__Bacteria;p__Proteobacteria;c__Deltaproteobacteria;o__Myxococcales;f__Archangiaceae;g__Anaeromyxobacter
Otu003027	2	1	1	k__Bacteria;p__Verrucomicrobia;c__Verrucomicrobiae;o__Pedosphaerales;f__Pedosphaeraceae;g__;s__
Otu003085	2	1	1	k__Bacteria;p__Verrucomicrobia;c__Verrucomicrobiae;o__Pedosphaerales;f__Pedosphaeraceae;g__;s__
Otu003089	1	2	1	k__Bacteria;p__Planctomycetes;c__Planctomycetacia;o__Pirellulales;f__Pirellulaceae;g__;s__
Otu003095	1	1	2	k__Bacteria;p__Planctomycetes;c__Planctomycetacia;o__Pirellulales;f__Pirellulaceae;g__Pirellula;s__
Otu003098	1	3	1	k__Bacteria;p__Planctomycetes;c__Planctomycetacia;o__Isosphaerales;f__Isosphaeraceae;g__;s__
Otu003106	2	1	1	k__Bacteria;p__Bacteroidetes;c__Bacteroidia;o__Cytophagales;f__Microscillaceae
Otu003171	1	2	1	k__Bacteria;p__Verrucomicrobia;c__Verrucomicrobiae;o__Pedosphaerales;f__Pedosphaeraceae;g__;s__
Otu003173	1	2	1	k__Bacteria;p__Planctomycetes;c__Planctomycetacia;o__Pirellulales;f__Pirellulaceae;g__;s__
Otu003228	2	1	1	k__Bacteria;p__Verrucomicrobia;c__Verrucomicrobiae;o__Verrucomicrobiales;f__DEV007;g__;s__
Otu003229	1	1	1	k__Bacteria;p__Actinobacteria;c__Thermoleophilia;o__Gaiellales;f__;g__;s__
Otu003256	1	1	1	k__Bacteria;p__Firmicutes;c__Bacilli;o__Lactobacillales;f__Lactobacillaceae
Otu003258	1	1	1	k__Bacteria;p__Actinobacteria;c__Thermoleophilia;o__Solirubrobacterales;f__67-14;g__;s__
Otu003262	2	1	1	k__Bacteria;p__Verrucomicrobia;c__Verrucomicrobiae;o__Verrucomicrobiales;f__Verrucomicrobiaceae;g__Roseimicrobium;s__
Otu003285	1	1	1	k__Bacteria;p__Verrucomicrobia;c__Verrucomicrobiae;o__Verrucomicrobiales;f__Rubritaleaceae;g__Luteolibacter
Otu003295	1	1	1	k__Bacteria;p__Patescibacteria;c__Saccharimonadia;o__Saccharimonadales;f__;g__;s__
Otu003302	1	1	1	k__Bacteria;p__Proteobacteria;c__Deltaproteobacteria;o__Desulfobacterales;f__Desulfobulbaceae;g__Desulfobulbus
Otu003306	1	1	1	k__Bacteria;p__Bacteroidetes;c__Bacteroidia;o__Cytophagales;f__Microscillaceae;g__Chryseolinea;s__
Otu003314	1	1	1	k__Bacteria;p__Kiritimatiellaeota;c__Kiritimatiellae;o__WCHB1-41;f__;g__;s__
Otu003331	1	1	1	k__Bacteria;p__Gemmatimonadetes;c__Gemmatimonadetes;o__Gemmatimonadales;f__Gemmatimonadaceae;g__;s__
Otu003354	2	1	1	k__Bacteria;p__Firmicutes;c__Clostridia;o__Clostridiales;f__Lachnospiraceae;g__Anaerostipes
Otu003356	1	1	1	k__Bacteria;p__Planctomycetes;c__Planctomycetacia;o__Isosphaerales;f__Isosphaeraceae
Otu003381	2	1	1	k__Bacteria;p__Planctomycetes;c__Planctomycetacia;o__Isosphaerales;f__Isosphaeraceae;g__;s__
Otu003387	1	1	1	k__Bacteria;p__Planctomycetes;c__Planctomycetacia;o__Pirellulales;f__Pirellulaceae;g__Rhodopirellula;s__
Otu003421	1	1	1	k__Bacteria;p__Proteobacteria;c__Alphaproteobacteria;o__Rhizobiales;f__A0839;g__;s__
Otu003430	1	1	1	k__Bacteria;p__Proteobacteria;c__Deltaproteobacteria;o__Syntrophobacterales;f__Syntrophaceae;g__Desulfobacca
Otu003432	1	1	1	k__Bacteria;p__Firmicutes;c__Clostridia;o__Clostridiales;f__Lachnospiraceae;g__Eubacterium_eligens_group;s__
Otu003439	1	1	1	k__Bacteria;p__Planctomycetes;c__Planctomycetacia;o__Gemmatales;f__Gemmataceae;g__;s__
Otu003471	1	1	1	k__Bacteria;p__Verrucomicrobia;c__Verrucomicrobiae;o__Verrucomicrobiales;f__Rubritaleaceae;g__Luteolibacter
Otu003498	1	1	1	k__Bacteria;p__Patescibacteria;c__CPR2;o__;f__;g__;s__
Otu003554	1	1	1	k__Bacteria;p__Chloroflexi;c__KD4-96;o__;f__;g__;s__
Otu003582	1	1	1	k__Bacteria;p__Planctomycetes;c__Planctomycetacia;o__Gemmatales;f__Gemmataceae;g__;s__
Otu003605	1	1	1	k__Bacteria;p__Verrucomicrobia;c__Verrucomicrobiae;o__Pedosphaerales;f__Pedosphaeraceae;g__;s__
Otu003625	1	1	1	k__Bacteria;p__Verrucomicrobia;c__Verrucomicrobiae;o__Verrucomicrobiales;f__Rubritaleaceae;g__Luteolibacter
Otu003979	1	1	1	k__Bacteria;p__Proteobacteria;c__Gammaproteobacteria

## Sheet: α diversity analysis
	group	sobs	shannon	chao	ace
Primary data	Adult(A)	2895.67	7.02399	3773.78	3909.75
	Juvenile(B)	2606	7.00275	3455.91	3561.74
	Sediment(C)	5901.2	10.2337	6863.51	7196.96
Kruskal–Wallis H test	p(A-VS-B-VS-C)	0.016	0.023	0.016	0.016

## Sheet: β diversity analysis
	Samples	PCO1	PCO2	PCO3
Primary data	A-1	-0.371261	0.0082705	0.13068
	A-2	-0.335534	0.00209101	0.104293
	A-3	-0.240614	0.18141	0.0401511
	B-1	-0.31456	-0.154457	-0.0883555
	B-2	-0.294487	-0.161237	-0.135894
	B-3	-0.252829	0.137274	-0.0578119
	C-1	0.383588	-0.0923009	0.087913
	C-2	0.363789	0.00903216	-0.00219384
	C-3	0.323445	0.163975	-0.149792
	C-4	0.364947	-0.0321348	0.0298311
	C-5	0.373516	-0.061923	0.0411787
Adonis test	diffs	Df	SumsOfSqs	MeanSqs	Fvalue	R2	Pvalue	significant
	A-vs-B-vs-C	2	1.2828	0.6414	15.2601	0.7923	0.003	**
	Note: A:adult(A1-A3); B: Juvenile(B1-B3); C: Sediment(C1-C5)
