# Supplementary material for: Comparison of the composition and function of gut microbes between adult and juvenile Cipangopaludina chinensis in the rice snail system
Source: PeerJ. 2022 Mar 8;10:e13042. doi: 10.7717/peerj.13042 (PMC8916024; doi:10.7717/peerj.13042)
Supplement: Supplemental Information 3 [file peerj-10-13042-s003.xls]

## Sheet: The phylum level 
Phylum	A-1	A-2	A-3	B-1	B-2	B-3	C-1	C-2	C-3	C-4	C-5
Proteobacteria	60.0185	59.5649	45.8538	66.7487	58.51	51.134	35.5744	32.1258	20.4883	33.4315	32.959
Verrucomicrobia	9.7483	7.9251	21.2124	9.4827	11.5238	20.9241	10.0228	17.0729	24.3506	14.9868	11.7246
Planctomycetes	2.9382	7.5535	13.7843	6.2857	5.7021	7.0713	9.8724	9.5557	18.0526	9.2668	10.1953
Acidobacteria	0.7335	1.3324	1.2824	1.4677	1.0971	1.6038	12.6902	11.4499	10.5728	11.0425	12.9564
Bacteroidetes	3.7264	4.4583	2.3133	5.1968	5.0957	5.0354	5.5538	5.5402	3.1552	6.599	6.1683
Chloroflexi	1.0318	1.4297	1.9059	1.1365	1.6396	2.1674	6.4643	7.0801	10.5416	6.7832	7.0416
Fusobacteria	8.8693	6.4582	3.5794	1.3216	3.2154	4.5107	0.1104	0.089	0.0623	0.1131	0.072
Cyanobacteria	2.7955	3.878	5.6863	2.8355	6.0917	2.5271	0.3856	0.4034	0.1791	0.3539	0.3459
Rokubacteria	0.2824	0.3267	0.3527	0.5639	0.2779	0.3865	4.0562	3.2502	2.906	3.7455	4.0929
Actinobacteria	0.7781	1.1645	1.0828	0.8199	1.7952	1.0629	2.6705	2.9219	1.956	2.1313	2.6592
Other	4.1456	3.3886	2.4431	3.956	4.6277	3.237	9.2867	8.1294	5.8352	8.923	9.2893
Unclassified	4.9325	2.52	0.5031	0.1851	0.4242	0.3395	3.3121	2.3821	1.9	2.6241	2.4948
Note: A:adult(A1-A3); B: Juvenile(B1-B3); C: Sediment(C1-C5)

## Sheet: The genus level
Genus	A-1	A-2	A-3	B-1	B-2	B-3	C-1	C-2	C-3	C-4	C-5
Aeromonas	30.6108	32.5548	19.7974	37.2958	33.1884	21.9253	0.76	0.6503	0.4812	0.753	0.7168
Luteolibacter	8.486	6.503	16.8879	8.0786	9.8124	17.5233	7.2435	13.2813	19.135	11.1217	9.1766
Cetobacterium	8.2713	5.9816	3.429	1.2464	2.9707	4.2584	0.096	0.0798	0.0592	0.0792	0.072
Flavobacterium	1.8041	1.6693	0.9625	2.6953	2.113	2.7969	1.5889	1.6151	0.936	1.9681	1.7733
Dechloromonas	0.245	0.3715	0.3719	0.3557	0.3098	0.3395	2.1521	2.1075	0.9438	2.2379	2.2288
Planktothrix_NIVA-CYA_15	0.3055	0.1627	0.1285	1.8653	4.9693	0.761	0.0512	0.0399	0.0234	0.0388	0.0407
Pirellula	0.2291	0.6482	1.0979	0.3384	0.2713	0.6241	0.736	0.8359	1.7909	0.7449	0.8061
Pseudomonas	0.5922	0.6085	0.525	1.7193	1.2261	0.5221	0.3312	0.3543	0.2118	0.4137	0.4038
Proteocatella	0.3271	0.5522	0.0479	2.3685	2.6396	0.3919	0.056	0.0383	0.0389	0.0582	0.0423
Sh765B-TzT-35	0.1369	0.155	0.1709	0.3253	0.1277	0.1839	1.0993	0.885	0.7647	0.9436	0.9704
Other	7.5968	9.1632	10.2559	7.3528	8.3117	9.9526	17.4304	16.8483	15.4976	17.583	17.0101
Unclassified	41.3924	41.6302	46.3254	36.356	34.0596	40.7195	68.454	63.2625	60.1194	64.0547	66.7599
Note: A:adult(A1-A3); B: Juvenile(B1-B3); C: Sediment(C1-C5)
