# Supplementary material for: Comparison of the composition and function of gut microbes between adult and juvenile Cipangopaludina chinensis in the rice snail system
Source: PeerJ. 2022 Mar 8;10:e13042. doi: 10.7717/peerj.13042 (PMC8916024; doi:10.7717/peerj.13042)
Supplement: Supplemental Information 4 [file peerj-10-13042-s004.xls]

## Sheet: Juvenile VS Adult
Genus	Juvenile	Adult	diff	conf_min	conf_max	p-value
Aeromonas	30.8032	27.6543	3.14883	-13.8488	20.1464	0.631916
Luteolibacter	11.8048	10.6256	1.17913	-10.8213	13.1796	0.797963
Cetobacterium	2.82517	5.89397	-3.0688	-8.01638	1.87878	0.149821
Flavobacterium	2.53507	1.47863	1.05643	0.106059	2.00681	0.0369306
Dechloromonas	0.335	0.329467	0.00553333	-0.157672	0.168738	0.910334
Planktothrix_NIVA-CYA_15	2.53187	0.1989	2.33297	-3.07305	7.73898	0.205032
Pirellula	0.411267	0.6584	-0.247133	-1.16965	0.675384	0.438532
Pseudomonas	1.15583	0.575233	0.5806	-0.902836	2.06404	0.236146
Proteocatella	1.8	0.309067	1.49093	-1.39944	4.38131	0.165354
Sh765B-TzT-35	0.2123	0.154267	0.0580333	-0.185839	0.301905	0.428204
Gemmata	0.302167	0.535167	-0.233	-0.909255	0.443255	0.360896
Defluviicoccus	0.228867	0.239833	-0.0109667	-0.176536	0.154603	0.838136
Bacteroides	0.4687	0.967933	-0.499233	-2.11827	1.1198	0.341673
Chthoniobacter	0.395067	0.368367	0.0267	-0.574044	0.627444	0.907237
Candidatus_Anammoximicrobium	0.221133	0.527533	-0.3064	-1.2292	0.616398	0.308512
SH-PL14	0.181967	0.173833	0.00813333	-0.226491	0.242758	0.922389
ADurbBin063-1	0.154433	0.244633	-0.0902	-0.476679	0.296279	0.478939
mle1-7	0.101367	0.0782333	0.0231333	-0.0565483	0.102815	0.410127
Mycoplasma	0.217567	0.7026	-0.485033	-1.85993	0.889861	0.293609
Fimbriiglobus	0.253167	0.242367	0.0108	-0.27871	0.30031	0.913599
Ellin6067	0.1169	0.1858	-0.0689	-0.217613	0.079813	0.219173
Roseomonas	0.219633	0.211533	0.0081	-0.142206	0.158406	0.888303
MND1	0.0614	0.0549667	0.00643333	-0.0254148	0.0382815	0.559034
Geobacter	0.0892667	0.0499333	0.0393333	0.0162973	0.0623694	0.0121606
Candidatus_Competibacter	0.097	0.1756	-0.0786	-0.22381	0.06661	0.203478
Paludibaculum	0.0812667	0.0809667	0.0003	-0.0425892	0.0431892	0.985436
Haliangium	0.0138667	0.0236	-0.00973333	-0.0330211	0.0135544	0.309305
Anaeromyxobacter	0.0572	0.0552333	0.00196667	-0.0574815	0.0614149	0.926016
Geothermobacter	0.0539333	0.0514	0.00253333	-0.0377506	0.0428173	0.833582
Gaiella	0.0719667	0.054	0.0179667	-0.0209568	0.0568901	0.263889
Nitrospira	0.0307333	0.0211333	0.0096	-0.0229749	0.0421749	0.420671
Cytophaga_xylanolytica_group	0.0535667	0.0351333	0.0184333	-0.0364447	0.0733114	0.359957
Blastopirellula	0.0681667	0.158367	-0.0902	-0.392121	0.211721	0.345779
Sva0081_sediment_group	0.0603	0.0814667	-0.0211667	-0.0690594	0.026726	0.221373
Dongia	0.0237	0.0254	-0.0017	-0.0175693	0.0141693	0.755123
BD1-7_clade	0.104433	0.1432	-0.0387667	-0.152355	0.074822	0.366758
Dinghuibacter	0.0479667	0.0365	0.0114667	-0.0112053	0.0341387	0.161758
Rivibacter	0.0645667	0.0363333	0.0282333	-0.0281286	0.0845953	0.171858
Acetobacteroides	0.250533	0.0124333	0.2381	-0.784707	1.26091	0.422253
Subgroup_10	0.0130667	0.0210333	-0.00796667	-0.0372722	0.0213389	0.462069
Paludibacter	0.189	0.0814667	0.107533	-0.171004	0.386071	0.273369
Silanimonas	0.2467	0.0275333	0.219167	0.0756335	0.3627	0.021664
Tabrizicola	0.0505667	0.0365	0.0140667	-0.0529357	0.081069	0.486406
Syntrophorhabdus	0.0230333	0.0280333	-0.005	-0.0421097	0.0321097	0.708555
OLB12	0.0637667	0.0790667	-0.0153	-0.12602	0.0954196	0.676264
Uliginosibacterium	0.102667	0.175367	-0.0727	-0.547661	0.402261	0.618094
Pir4_lineage	0.0365	0.028	0.0085	-0.0309479	0.0479479	0.578866
Sediminibacterium	0.253867	0.0126667	0.2412	-0.255554	0.737954	0.1719
Rhodopirellula	0.0248	0.0559667	-0.0311667	-0.122874	0.0605408	0.321364
Bryobacter	0.023	0.0316667	-0.00866667	-0.0461527	0.0288194	0.491579
Romboutsia	0.1161	0.133667	-0.0175667	-0.442843	0.40771	0.878476
Candidatus_Xiphinematobacter	0.0408333	0.0268333	0.014	-0.042827	0.070827	0.528935
SM1A02	0.0453	0.0773	-0.032	-0.146064	0.0820638	0.453301
RB41	0.0018	0.0049	-0.0031	-0.0121443	0.00594428	0.294934
BSV13	0.0643667	0.0144333	0.0499333	-0.0794008	0.179267	0.266647
Eubacterium_brachy_group	0.00963333	0.00626667	0.00336667	-0.008121	0.0148543	0.410708
Pir2_lineage	0.0241667	0.0161	0.00806667	-0.0550216	0.0711549	0.672158
Gemmobacter	0.0480333	0.0309667	0.0170667	-0.0178565	0.0519898	0.244703
Desulfatiglans	0.0318	0.0378667	-0.00606667	-0.0475782	0.0354449	0.647639
Schlesneria	0.0594667	0.0886333	-0.0291667	-0.195483	0.137149	0.542723
Desulfomicrobium	0.0094	0.0049	0.0045	-0.0143276	0.0233276	0.454761
Deefgea	0.0843667	0.1244	-0.0400333	-0.2048	0.124734	0.479153
RBG-16-49-21	0.0037	0.00546667	-0.00176667	-0.00962145	0.00608812	0.441824
Polynucleobacter	0.174833	0.0139	0.160933	-0.173175	0.495042	0.174447
Sphingomonas	0.00506667	0.00773333	-0.00266667	-0.00643983	0.0011065	0.114877
Candidatus_Udaeobacter	0.00986667	0.0151	-0.00523333	-0.0239643	0.0134977	0.469755
Hyphomicrobium	0.0470333	0.0230333	0.024	-0.00380505	0.0518051	0.0696516
Rhodoferax	0.00316667	0.0028	0.000366667	-0.00645059	0.00718392	0.885122
Desulfobulbus	0.0179	0.00716667	0.0107333	-0.00908063	0.0305473	0.164655
Chitinibacter	0.11	0.0356	0.0744	-0.0433437	0.192144	0.114326
Hydrogenispora	0.0102667	0.00356667	0.0067	-0.0221573	0.0355573	0.429949
Thermoanaerobaculum	0.00993333	0.0196	-0.00966667	-0.0563524	0.0370191	0.543995
Methanosaeta	0.00223333	0.0121	-0.00986667	-0.0519112	0.0321779	0.426499
Sporobacter	0.0027	0.0023	0.0004	-0.00225636	0.00305636	0.677414
Anaerolinea	0.0032	0.0044	-0.0012	-0.00966794	0.00726794	0.665372
oc32	0.0356333	0.0670667	-0.0314333	-0.10164	0.0387734	0.251626
Lacunisphaera	0.036	0.0118667	0.0241333	-0.023761	0.0720277	0.208458
Planctomicrobium	0.0169667	0.0293333	-0.0123667	-0.0475291	0.0227957	0.311119
Candidatus_Solibacter	0.00543333	0.00496667	0.000466667	-0.00684504	0.00777837	0.866182
Clostridium_sensu_stricto_1	0.0282333	0.0775667	-0.0493333	-0.140115	0.0414484	0.205792
Clostridium_sensu_stricto_13	0.0417333	0.0776667	-0.0359333	-0.157775	0.0859085	0.394617
possible_genus_03	0.0363333	0.0924	-0.0560667	-0.189182	0.0770489	0.248437
Pedomicrobium	0.00556667	0.0143333	-0.00876667	-0.0219208	0.00438744	0.121791
Azospira	0.0349333	0.0036	0.0313333	-0.0393019	0.101969	0.196767
Candidatus_Bacilloplasma	0.0917333	0.0220667	0.0696667	-0.137721	0.277054	0.323939
Zavarzinella	0.0232667	0.0036	0.0196667	0.0138743	0.025459	0.00114038
Akkermansia	0.0331	0.0669	-0.0338	-0.222305	0.154705	0.596722
Bacillus	0.00636667	0.0115333	-0.00516667	-0.0216079	0.0112746	0.388134
Plesiomonas	0.0528333	0.0222	0.0306333	-0.18664	0.247907	0.607546
Methanosarcina	0	0.00173333	-0.00173333	-0.00650736	0.00304069	0.258654

## Sheet: Snail gut VS Sediment
Genus	Gut	Sediment	diff	conf_min	conf_max	p-value	q-value	Domain	Phylum	Class	Order	Family
Aeromonas	29.2288	0.67226	28.5565	21.3466	35.7664	0.000156365	0.00234547	Bacteria	Proteobacteria	Gammaproteobacteria	Aeromonadales	Aeromonadaceae
Luteolibacter	11.2152	11.9916	-0.77642	-7.19185	5.63901	0.789761	0.80771	Bacteria	Verrucomicrobia	Verrucomicrobiae	Verrucomicrobiales	Rubritaleaceae
Cetobacterium	4.35957	0.07724	4.28233	1.69341	6.87124	0.00807574	0.0186363	Bacteria	Fusobacteria	Fusobacteriia	Fusobacteriales	Fusobacteriaceae
Flavobacterium	2.00685	1.57628	0.43057	-0.328248	1.18939	0.22748	0.262477	Bacteria	Bacteroidetes	Bacteroidia	Flavobacteriales	Flavobacteriaceae
Dechloromonas	0.332233	1.93402	-1.60179	-2.29117	-0.912405	0.00289821	0.00967199	Bacteria	Proteobacteria	Gammaproteobacteria	Betaproteobacteriales	Rhodocyclaceae
Planktothrix_NIVA-CYA_15	1.36538	0.0388	1.32658	-0.648084	3.30125	0.144768	0.18096	Bacteria	Cyanobacteria	Oxyphotobacteria	Nostocales	Phormidiaceae
Pirellula	0.534833	0.98276	-0.447927	-1.02035	0.124494	0.10709	0.143853	Bacteria	Planctomycetes	Planctomycetacia	Pirellulales	Pirellulaceae
Pseudomonas	0.865533	0.34296	0.522573	0.00242105	1.04273	0.0492634	0.0806128	Bacteria	Proteobacteria	Gammaproteobacteria	Pseudomonadales	Pseudomonadaceae
Proteocatella	1.05453	0.04674	1.00779	-0.186234	2.20182	0.0821822	0.119297	Bacteria	Firmicutes	Clostridia	Clostridiales	Peptostreptococcaceae
Sh765B-TzT-35	0.183283	0.9326	-0.749317	-0.899967	-0.598667	1.44776e-05	0.000651492	Bacteria	Rokubacteria	NC10	Methylomirabilales	Methylomirabilaceae
Gemmata	0.418667	0.61562	-0.196953	-0.614352	0.220445	0.307938	0.342153	Bacteria	Planctomycetes	Planctomycetacia	Gemmatales	Gemmataceae
Defluviicoccus	0.23435	0.74948	-0.51513	-0.79934	-0.23092	0.00657307	0.01593	Bacteria	Proteobacteria	Alphaproteobacteria	Rhodospirillales	Rhodopirillaceae
Bacteroides	0.718317	0.04364	0.674677	0.116987	1.23237	0.0265453	0.0519366	Bacteria	Bacteroidetes	Bacteroidia	Bacteroidales	Bacteroidaceae
Chthoniobacter	0.381717	0.3991	-0.0173833	-0.288672	0.253906	0.887413	0.887413	Bacteria	Verrucomicrobia	Verrucomicrobiae	Chthoniobacterales	Chthoniobacteraceae
Candidatus_Anammoximicrobium	0.374333	0.34824	0.0260933	-0.308698	0.360885	0.861692	0.871374	Bacteria	Planctomycetes	Planctomycetacia	Pirellulales	Pirellulaceae
SH-PL14	0.1779	0.47914	-0.30124	-0.600598	-0.00188216	0.0490448	0.0806128	Bacteria	Planctomycetes	Planctomycetacia	Planctomycetales	Rubinisphaeraceae
ADurbBin063-1	0.199533	0.4448	-0.245267	-0.425752	-0.0647811	0.0135354	0.0284117	Bacteria	Verrucomicrobia	Verrucomicrobiae	Pedosphaerales	Pedosphaeraceae
mle1-7	0.0898	0.46244	-0.37264	-0.509091	-0.236189	0.00122846	0.005819	Bacteria	Proteobacteria	Gammaproteobacteria	Betaproteobacteriales	Nitrosomonadaceae
Mycoplasma	0.460083	0.00788	0.452203	-0.0439317	0.948338	0.0661376	0.102627	Bacteria	Tenericutes	Mollicutes	Mycoplasmatales	Mycoplasmataceae
Fimbriiglobus	0.247767	0.21954	0.0282267	-0.142505	0.198958	0.709442	0.733906	Bacteria	Planctomycetes	Planctomycetacia	Gemmatales	Gemmataceae
Ellin6067	0.15135	0.32062	-0.16927	-0.27303	-0.0655101	0.00605454	0.0151684	Bacteria	Proteobacteria	Gammaproteobacteria	Betaproteobacteriales	Nitrosomonadaceae
Roseomonas	0.215583	0.23432	-0.0187367	-0.0970697	0.0595964	0.600936	0.636285	Bacteria	Proteobacteria	Alphaproteobacteria	Acetobacterales	Acetobacteraceae
MND1	0.0581833	0.40316	-0.344977	-0.483933	-0.20602	0.00223863	0.00917579	Bacteria	Proteobacteria	Gammaproteobacteria	Betaproteobacteriales	Nitrosomonadaceae
Geobacter	0.0696	0.32928	-0.25968	-0.369493	-0.149867	0.00224297	0.00917579	Bacteria	Proteobacteria	Deltaproteobacteria	Desulfuromonadales	Geobacteraceae
Candidatus_Competibacter	0.1363	0.2072	-0.0709	-0.14908	0.00728033	0.0699289	0.104893	Bacteria	Proteobacteria	Gammaproteobacteria	Competibacterales	Competibacteraceae
Paludibaculum	0.0811167	0.27092	-0.189803	-0.271635	-0.107971	0.00243691	0.00950975	Bacteria	Acidobacteria	Acidobacteriia	Solibacterales	Solibacteraceae_Subgroup_3
Haliangium	0.0187333	0.33706	-0.318327	-0.418324	-0.21833	0.000829635	0.00499338	Bacteria	Proteobacteria	Deltaproteobacteria	Myxococcales	Haliangiaceae
Anaeromyxobacter	0.0562167	0.2841	-0.227883	-0.364583	-0.091184	0.00922815	0.0202569	Bacteria	Proteobacteria	Deltaproteobacteria	Myxococcales	Archangiaceae
Geothermobacter	0.0526667	0.2813	-0.228633	-0.3388	-0.118467	0.0042888	0.0130758	Bacteria	Proteobacteria	Deltaproteobacteria	Desulfuromonadales	Geobacteraceae
Gaiella	0.0629833	0.245	-0.182017	-0.264375	-0.0996584	0.0029016	0.00967199	Bacteria	Actinobacteria	Thermoleophilia	Gaiellales	Gaiellaceae
Nitrospira	0.0259333	0.24782	-0.221887	-0.28063	-0.163143	0.000311525	0.00350465	Bacteria	Nitrospirae	Nitrospira	Nitrospirales	Nitrospiraceae
Cytophaga_xylanolytica_group	0.04435	0.22046	-0.17611	-0.248265	-0.103955	0.00161128	0.00725075	Bacteria	Bacteroidetes	Bacteroidia	Bacteroidales	Marinilabiliaceae
Blastopirellula	0.113267	0.13202	-0.0187533	-0.12711	0.0896035	0.702202	0.733906	Bacteria	Planctomycetes	Planctomycetacia	Pirellulales	Pirellulaceae
Sva0081_sediment_group	0.0708833	0.18262	-0.111737	-0.151563	-0.0719105	0.000460951	0.00426688	Bacteria	Proteobacteria	Deltaproteobacteria	Desulfobacterales	Desulfobacteraceae
Dongia	0.02455	0.21728	-0.19273	-0.250007	-0.135453	0.000676926	0.00499338	Bacteria	Proteobacteria	Alphaproteobacteria	Dongiales	Dongiaceae
BD1-7_clade	0.123817	0.0936	0.0302167	-0.0213445	0.0817778	0.215434	0.251806	Bacteria	Proteobacteria	Gammaproteobacteria	Cellvibrionales	Spongiibacteraceae
Dinghuibacter	0.0422333	0.1854	-0.143167	-0.203947	-0.0823868	0.00255652	0.00950975	Bacteria	Bacteroidetes	Bacteroidia	Chitinophagales	Chitinophagaceae
Rivibacter	0.05045	0.16816	-0.11771	-0.181885	-0.0535354	0.00508644	0.0138721	Bacteria	Proteobacteria	Gammaproteobacteria	Betaproteobacteriales	Burkholderiaceae
Acetobacteroides	0.131483	0.05856	0.0729233	-0.23286	0.378707	0.566879	0.607371	Bacteria	Bacteroidetes	Bacteroidia	Bacteroidales	Rikenellaceae
Subgroup_10	0.01705	0.19134	-0.17429	-0.225536	-0.123044	0.000474098	0.00426688	Bacteria	Acidobacteria	Thermoanaerobaculia	Thermoanaerobaculales	Thermoanaerobaculaceae
Paludibacter	0.135233	0.04754	0.0876933	-0.0194168	0.194803	0.0907603	0.125668	Bacteria	Bacteroidetes	Bacteroidia	Bacteroidales	Paludibacteraceae
Silanimonas	0.137117	0.0285	0.108617	-0.0234628	0.240696	0.0885101	0.124613	Bacteria	Proteobacteria	Gammaproteobacteria	Xanthomonadales	Xanthomonadaceae
Tabrizicola	0.0435333	0.13996	-0.0964267	-0.136218	-0.0566352	0.000858645	0.00499338	Bacteria	Proteobacteria	Alphaproteobacteria	Rhodobacterales	Rhodobacteraceae
Syntrophorhabdus	0.0255333	0.15966	-0.134127	-0.160401	-0.107852	8.57702e-06	0.000651492	Bacteria	Proteobacteria	Deltaproteobacteria	Deltaproteobacteria_Incertae_Sedis	Syntrophorhabdaceae
OLB12	0.0714167	0.10138	-0.0299633	-0.0984968	0.0385701	0.334033	0.362204	Bacteria	Bacteroidetes	Bacteroidia	Cytophagales	Microscillaceae
Uliginosibacterium	0.139017	0.0139	0.125117	-0.0272437	0.277477	0.0886137	0.124613	Bacteria	Proteobacteria	Gammaproteobacteria	Betaproteobacteriales	Rhodocyclaceae
Pir4_lineage	0.03225	0.14184	-0.10959	-0.197011	-0.022169	0.0245964	0.0491929	Bacteria	Planctomycetes	Planctomycetacia	Pirellulales	Pirellulaceae
Sediminibacterium	0.133267	0.01606	0.117207	-0.0747186	0.309132	0.177306	0.215642	Bacteria	Bacteroidetes	Bacteroidia	Chitinophagales	Chitinophagaceae
Rhodopirellula	0.0403833	0.12158	-0.0811967	-0.171422	0.00902892	0.0690088	0.104893	Bacteria	Planctomycetes	Planctomycetacia	Pirellulales	Pirellulaceae
Bryobacter	0.0273333	0.1367	-0.109367	-0.168931	-0.0498026	0.00606735	0.0151684	Bacteria	Acidobacteria	Acidobacteriia	Solibacterales	Solibacteraceae_Subgroup_3
Romboutsia	0.124883	0.01508	0.109803	-0.00767189	0.227279	0.061435	0.0970026	Bacteria	Firmicutes	Clostridia	Clostridiales	Peptostreptococcaceae
Candidatus_Xiphinematobacter	0.0338333	0.12372	-0.0898867	-0.159038	-0.0207358	0.0202825	0.0414869	Bacteria	Verrucomicrobia	Verrucomicrobiae	Chthoniobacterales	Xiphinematobacteraceae
SM1A02	0.0613	0.08544	-0.02414	-0.0717823	0.0235023	0.268629	0.302208	Bacteria	Planctomycetes	Phycisphaerae	Phycisphaerales	Phycisphaeraceae
RB41	0.00335	0.15024	-0.14689	-0.179258	-0.114522	0.00020768	0.00267017	Bacteria	Acidobacteria	Blastocatellia_Subgroup_4	Pyrinomonadales	Pyrinomonadaceae
BSV13	0.0394	0.09494	-0.05554	-0.106857	-0.0042232	0.0371814	0.0669266	Bacteria	Bacteroidetes	Bacteroidia	Bacteroidales	Prolixibacteraceae
Eubacterium_brachy_group	0.00795	0.13154	-0.12359	-0.143673	-0.103507	3.73752e-05	0.00112126	Bacteria	Firmicutes	Clostridia	Clostridiales	Family_XIII
Pir2_lineage	0.0201333	0.11602	-0.0958867	-0.132611	-0.0591624	0.000541397	0.00442962	Bacteria	Planctomycetes	Planctomycetacia	Pirellulales	Pirellulaceae
Gemmobacter	0.0395	0.09266	-0.05316	-0.0719295	-0.0343905	0.00014995	0.00234547	Bacteria	Proteobacteria	Alphaproteobacteria	Rhodobacterales	Rhodobacteraceae
Desulfatiglans	0.0348333	0.09496	-0.0601267	-0.0955712	-0.0246822	0.006726	0.01593	Bacteria	Proteobacteria	Deltaproteobacteria	Desulfarculales	Desulfarculaceae
Schlesneria	0.07405	0.04746	0.02659	-0.0231014	0.0762814	0.242359	0.276106	Bacteria	Planctomycetes	Planctomycetacia	Planctomycetales	Schlesneriaceae
Desulfomicrobium	0.00715	0.12536	-0.11821	-0.141359	-0.0950609	6.48826e-05	0.00145986	Bacteria	Proteobacteria	Deltaproteobacteria	Desulfovibrionales	Desulfomicrobiaceae
Deefgea	0.104383	0.00692	0.0974633	0.0365887	0.158338	0.00919531	0.0202569	Bacteria	Proteobacteria	Gammaproteobacteria	Betaproteobacteriales	Chitinibacteraceae
RBG-16-49-21	0.00458333	0.12254	-0.117957	-0.155107	-0.0808066	0.000887713	0.00499338	Bacteria	Spirochaetes	Leptospirae	Leptospirales	Leptospiraceae
Polynucleobacter	0.0943667	0.0126	0.0817667	-0.0469748	0.210508	0.163709	0.201833	Bacteria	Proteobacteria	Gammaproteobacteria	Betaproteobacteriales	Burkholderiaceae
Sphingomonas	0.0064	0.11638	-0.10998	-0.146302	-0.0736581	0.00107136	0.00535678	Bacteria	Proteobacteria	Alphaproteobacteria	Sphingomonadales	Sphingomonadaceae
Candidatus_Udaeobacter	0.0124833	0.10572	-0.0932367	-0.177431	-0.00904224	0.0370102	0.0669266	Bacteria	Verrucomicrobia	Verrucomicrobiae	Chthoniobacterales	Chthoniobacteraceae
Hyphomicrobium	0.0350333	0.0775	-0.0424667	-0.0676354	-0.017298	0.00472646	0.013722	Bacteria	Proteobacteria	Alphaproteobacteria	Rhizobiales	Hyphomicrobiaceae
Rhodoferax	0.00298333	0.11558	-0.112597	-0.16325	-0.0619431	0.00345698	0.0111117	Bacteria	Proteobacteria	Gammaproteobacteria	Betaproteobacteriales	Burkholderiaceae
Desulfobulbus	0.0125333	0.10122	-0.0886867	-0.134269	-0.0431045	0.00504552	0.0138721	Bacteria	Proteobacteria	Deltaproteobacteria	Desulfobacterales	Desulfobulbaceae
Chitinibacter	0.0728	0.02612	0.04668	-0.00673435	0.100094	0.0751768	0.110917	Bacteria	Proteobacteria	Gammaproteobacteria	Betaproteobacteriales	Chitinibacteraceae
Hydrogenispora	0.00691667	0.0959	-0.0889833	-0.217105	0.0391385	0.126487	0.164983	Bacteria	Firmicutes	Clostridia	Clostridiales	Heliobacteriaceae
Thermoanaerobaculum	0.0147667	0.08612	-0.0713533	-0.100941	-0.0417659	0.000754256	0.00499338	Bacteria	Acidobacteria	Thermoanaerobaculia	Thermoanaerobaculales	Thermoanaerobaculaceae
Methanosaeta	0.00716667	0.09416	-0.0869933	-0.172602	-0.0013848	0.047711	0.0806128	Archaea	Euryarchaeota	Methanomicrobia	Methanosarcinales	Methanosaetaceae
Sporobacter	0.0025	0.0964	-0.0939	-0.124174	-0.063626	0.000991385	0.00524851	Bacteria	Firmicutes	Clostridia	Clostridiales	Ruminococcaceae
Anaerolinea	0.0038	0.09458	-0.09078	-0.136919	-0.0446407	0.00538554	0.0142559	Bacteria	Chloroflexi	Anaerolineae	Anaerolineales	Anaerolineaceae
oc32	0.05135	0.03752	0.01383	-0.0176312	0.0452912	0.32748	0.359429	Bacteria	Proteobacteria	Gammaproteobacteria	Betaproteobacteriales	Nitrosomonadaceae
Lacunisphaera	0.0239333	0.06856	-0.0446267	-0.0772669	-0.0119864	0.0135745	0.0284117	Bacteria	Verrucomicrobia	Verrucomicrobiae	Opitutales	Opitutaceae
Planctomicrobium	0.02315	0.06628	-0.04313	-0.0807994	-0.00546062	0.0320002	0.0600004	Bacteria	Planctomycetes	Planctomycetacia	Planctomycetales	Rubinisphaeraceae
Candidatus_Solibacter	0.0052	0.08604	-0.08084	-0.114879	-0.0468013	0.0026416	0.00950975	Bacteria	Acidobacteria	Acidobacteriia	Solibacterales	Solibacteraceae_Subgroup_3
Clostridium_sensu_stricto_1	0.0529	0.02076	0.03214	-0.0148784	0.0791584	0.140246	0.180179	Bacteria	Firmicutes	Clostridia	Clostridiales	Clostridiaceae_1
Clostridium_sensu_stricto_13	0.0597	0.01036	0.04934	0.00371282	0.0949672	0.0386583	0.0682205	Bacteria	Firmicutes	Clostridia	Clostridiales	Clostridiaceae_1
possible_genus_03	0.0643667	0.00222	0.0621467	0.00826517	0.116028	0.0313076	0.0599507	Bacteria	Fibrobacteres	Chitinivibrionia	Chitinivibrionales	Chitinivibrionaceae
Pedomicrobium	0.00995	0.06688	-0.05693	-0.085553	-0.028307	0.0043586	0.0130758	Bacteria	Proteobacteria	Alphaproteobacteria	Rhizobiales	Hyphomicrobiaceae
Azospira	0.0192667	0.05258	-0.0333133	-0.0902298	0.0236031	0.201019	0.238049	Bacteria	Proteobacteria	Gammaproteobacteria	Betaproteobacteriales	Rhodocyclaceae
Candidatus_Bacilloplasma	0.0569	0.00064	0.05626	-0.0199921	0.132512	0.116393	0.154049	Bacteria	Tenericutes	Mollicutes	Mycoplasmatales	Mycoplasmataceae
Zavarzinella	0.0134333	0.05176	-0.0383267	-0.0786554	0.00200202	0.0582613	0.0936342	Bacteria	Planctomycetes	Planctomycetacia	Gemmatales	Gemmataceae
Akkermansia	0.05	0.00372	0.04628	-0.0218017	0.114362	0.142141	0.180179	Bacteria	Verrucomicrobia	Verrucomicrobiae	Verrucomicrobiales	Akkermansiaceae
Bacillus	0.00895	0.0487	-0.03975	-0.0771293	-0.00237071	0.0416194	0.0720335	Bacteria	Firmicutes	Bacilli	Bacillales	Bacillaceae
Plesiomonas	0.0375167	0.00126	0.0362567	-0.0247557	0.097269	0.187266	0.224719	Bacteria	Proteobacteria	Gammaproteobacteria	Enterobacteriales	Enterobacteriaceae
Methanosarcina	0.000866667	0.04154	-0.0406733	-0.0937658	0.0124191	0.100603	0.137187	Archaea	Euryarchaeota	Methanomicrobia	Methanosarcinales	Methanosarcinaceae
