# Supplementary material for: Comparison of the composition and function of gut microbes between adult and juvenile Cipangopaludina chinensis in the rice snail system
Source: PeerJ. 2022 Mar 8;10:e13042. doi: 10.7717/peerj.13042 (PMC8916024; doi:10.7717/peerj.13042)
Supplement: Supplemental Information 5 [file peerj-10-13042-s005.xls]

## Sheet: Heatmap analysis
Level_2	A-1	A-2	A-3	B-1	B-2	B-3	C-1	C-2	C-3	C-4	C-5	Level_1
Metabolism of cofactors and vitamins	543178	609786	541812	565850	598671	568150	387232	408872	389712	386586	396464	Metabolism
Carbohydrate metabolism	528767	595356	526276	551589	586077	556591	383595	407219	396883	381960	395713	Metabolism
Amino acid metabolism	475813	538503	474392	501727	529862	501193	376353	392434	370695	370592	386267	Metabolism
Metabolism of terpenoids and polyketides	330605	363665	330419	322889	351930	351761	292873	307870	295947	290677	300735	Metabolism
Metabolism of other amino acids	316399	354375	297532	328331	344769	317915	222108	228758	206363	217708	224926	Metabolism
Lipid metabolism	225240	259217	227735	240366	255764	237794	183492	190408	182343	179082	187659	Metabolism
Energy metabolism	239431	270085	235634	250733	268692	246385	161110	169344	159633	160305	165535	Metabolism
Replication and repair	193392	214421	191421	193754	209275	203324	152695	160561	152091	152007	156587	Genetic Information Processing
Xenobiotics biodegradation and metabolism	187097	213216	179160	198365	214885	172826	130251	135029	127534	125611	133768	Metabolism
Glycan biosynthesis and metabolism	148997	167504	151468	156528	165568	162309	109651	119073	115774	112329	114020	Metabolism
Cell motility	173209	194409	139774	191635	186300	152738	80376.5	76491.6	60255	75798.6	78696	Cellular Processes
Folding, sorting and degradation	138775	156431	138952	142048	151374	143963	105467	109669	104923	103925	107829	Genetic Information Processing
Translation	107014	119963	109458	107457	116422	114129	92426	96511.4	92343.1	91421.5	94696.1	Genetic Information Processing
Biosynthesis of other secondary metabolites	79550.6	90430.3	94140.7	82149.2	103279	86102.7	79720.2	83808.1	72286.9	78685.1	82419	Metabolism
Membrane transport	106988	117702	92977.4	109753	112246	100649	49392.1	51231.5	47021.6	48534.8	50202.6	Environmental Information Processing
Nucleotide metabolism	73229.9	81474.1	70349.4	74325.9	79313.5	74967.2	50488.8	53087.6	50259.6	50234.1	51945.8	Metabolism
Cell growth and death	49050.3	55460.5	48784	50049.6	53586.4	51084	43414.9	44471.2	40754.5	42471.9	44004.1	Cellular Processes
Transcription	28885.2	33008.7	32810.5	29356.3	31940.6	32850.6	27851.3	29675.3	29975.4	27858.2	28799.9	Genetic Information Processing
Signal transduction	23839.3	27242.4	21382.1	26764.1	27276	22743.3	13445.7	13660.4	12107.6	13100	13590	Environmental Information Processing
Cellular community - prokaryotes	24985.3	27549.2	19602.2	27272.5	26425.9	21718.7	6308.77	6317.3	5100.75	6177.85	6337.09	Cellular Processes
Transport and catabolism	13175	15198.5	12965.3	14494.1	15081.4	13919.2	9195.28	9751.58	9111.64	9218.46	9496.91	Cellular Processes
Environmental adaptation	9826.85	10860.4	8728.21	10131.6	10305.4	9408.67	5302.95	5426.12	4877.93	5217.55	5337.38	Organismal Systems
Infectious diseases	10293.5	11535.9	8334.34	11731.8	12210.2	9600.25	4269.45	4518.28	3867.86	4281.66	4491.41	Human Diseases
Endocrine system	3049.43	3420.62	3250.97	3221.04	3491.45	3345.35	2172.85	2372.57	2249.44	2217.54	2246.31	Organismal Systems
Neurodegenerative diseases	3434.21	3809.99	2999.23	3717.16	3701.04	3331.19	2082.55	2104.2	1609.36	2041.3	2089.79	Human Diseases
Immune system	2828.16	3122.1	2557.07	2942.3	3155.3	2788.58	1316.3	1476.62	1423.94	1403.18	1344.22	Organismal Systems
Digestive system	184.204	300.468	195.199	256.724	287.742	307.545	616.331	606.21	493.345	588.509	661.527	Organismal Systems
Cardiovascular diseases	13.8887	29.8132	42.4979	24.735	26.4882	33.4376	64.0587	58.1758	60.8361	51.5413	54.9479	Human Diseases
Immune diseases	4.173	9.6222	15.8983	9.2817	6.7961	13.76	26.5809	29.5287	44.8613	25.9991	28.7809	Human Diseases
Excretory system	1.4706	1.3529	1.3529	1.8824	1.8235	1.0588	9.5	7.8235	4.1176	10.9471	7.3235	Organismal Systems
Signaling molecules and interaction	2.0424	0	0.0067	0.9353	2.4843	2.3571	6.0019	3.7453	0.991	2.4438	3.8033	Environmental Information Processing
Development	0.3333	0.75	0.4167	0	0	0.0833	0	0	0.8333	0	1.4167	Organismal Systems
Note: A:adult(A1-A3); B: Juvenile(B1-B3); C: Sediment(C1-C5)

## Sheet: Tukey HSD test
Level_2	Adult(A)	Juvenile(B)	Sediment(C)	p(B_vs_A)	p(C_vs_A)	p(C_vs_B)	Level_1
Metabolism of cofactors and vitamins	564926	577557	393773	0.776475	1.62054e-05	9.49552e-06	Metabolism
Carbohydrate metabolism	550133	564752	393074	0.72415	3.55502e-05	1.83658e-05	Metabolism
Amino acid metabolism	496236	510928	379268	0.685387	0.000171244	7.33571e-05	Metabolism
Metabolism of terpenoids and polyketides	341563	342193	297620	0.998225	0.00555458	0.00511264	Metabolism
Metabolism of other amino acids	322768	330338	219973	0.853232	9.26181e-05	5.53147e-05	Metabolism
Lipid metabolism	237397	244641	184597	0.713935	0.000478868	0.00019656	Metabolism
Energy metabolism	248383	255270	163185	0.752223	2.02574e-05	1.13202e-05	Metabolism
Replication and repair	199745	202118	154788	0.929362	0.000141377	9.78434e-05	Genetic Information Processing
Xenobiotics biodegradation and metabolism	193158	195358	130438	0.980189	0.00076168	0.000604661	Metabolism
Glycan biosynthesis and metabolism	155990	161468	114170	0.53687	3.40317e-05	1.36128e-05	Metabolism
Cell motility	169131	176891	74323.6	0.863675	0.000261636	0.000150385	Cellular Processes
Folding, sorting and degradation	144720	145795	106363	0.972765	5.08587e-05	4.15239e-05	Genetic Information Processing
Translation	112145	112669	93479.6	0.988386	0.00103825	0.000865258	Genetic Information Processing
Biosynthesis of other secondary metabolites	88040.5	90510.3	79383.9	0.914649	0.305708	0.165171	Metabolism
Membrane transport	105889	107549	49276.5	0.95485	1.03878e-05	8.35548e-06	Environmental Information Processing
Nucleotide metabolism	75017.8	76202.2	51203.2	0.901018	2.50392e-05	1.74429e-05	Metabolism
Cell growth and death	51098.3	51573.3	43023.3	0.966678	0.00377761	0.00266821	Cellular Processes
Transcription	31568.1	31382.5	28832	0.989377	0.114134	0.142925	Genetic Information Processing
Signal transduction	24154.6	25594.5	13180.8	0.660033	0.000163697	6.75637e-05	Environmental Information Processing
Cellular community - prokaryotes	24045.6	25139	6048.35	0.861273	2.84911e-05	1.83749e-05	Cellular Processes
Transport and catabolism	13779.6	14498.2	9354.77	0.462004	6.91059e-05	2.28514e-05	Cellular Processes
Environmental adaptation	9805.15	9948.55	5232.39	0.954529	1.67097e-05	1.32601e-05	Organismal Systems
Infectious diseases	10054.6	11180.8	4285.73	0.445911	0.000215546	6.01308e-05	Human Diseases
Endocrine system	3240.34	3352.61	2251.74	0.547004	1.32834e-05	5.90672e-06	Organismal Systems
Neurodegenerative diseases	3414.48	3583.13	1985.44	0.740948	0.000257994	0.000117262	Human Diseases
Immune system	2835.78	2962.06	1392.85	0.663583	8.79676e-06	4.66725e-06	Organismal Systems
Digestive system	226.624	284.004	593.184	0.454654	4.86412e-05	0.000165917	Organismal Systems
Cardiovascular diseases	28.7333	28.2203	57.912	0.996836	0.00332925	0.00299419	Human Diseases
Immune diseases	9.89783	9.94593	31.1502	0.999955	0.0051545	0.00522309	Human Diseases
Excretory system	1.39213	1.58823	7.94234	0.990602	0.00305862	0.00367689	Organismal Systems
Signaling molecules and interaction	0.683033	1.92557	3.39706	0.589233	0.0876001	0.412887	Environmental Information Processing
Development	0.5	0.0277667	0.45	0.47381	0.988538	0.474031	Organismal Systems
